# Supplementary material for: Invasive pneumococcal disease, pneumococcal pneumonia and all-cause pneumonia in Hong Kong during the COVID-19 pandemic compared with the preceding 5 years: a retrospective observational study
Source: PubMed Central journal article supplement — BMJ Open. 2021 Oct 11;11(10):e055575. doi: 10.1136/bmjopen-2021-055575 (PMC8506049; doi:10.1136/bmjopen-2021-055575), 2021-10-11
Supplement: bmjopen-2021-055575.draft_revisions.pdf [file bmjopen-2021-055575.draft_revisions.pdf]

# BMJ Open

BMJ Open is committed to open peer review. As part of this commitment we make the peer review history of every article we publish publicly available.

When an article is published we post the peer reviewers' comments and the authors' responses online. We also post the versions of the paper that were used during peer review. These are the versions that the peer review comments apply to.

The versions of the paper that follow are the versions that were submitted during the peer review process. They are not the versions of record or the final published versions. They should not be cited or distributed as the published version of this manuscript.

BMJ Open is an open access journal and the full, final, typeset and author-corrected version of record of the manuscript is available on our site with no access controls, subscription charges or pay-per-view fees (<http://bmjopen.bmj.com>).

If you have any questions on BMJ Open's open peer review process please email [info.bmjopen@bmj.com](mailto:info.bmjopen@bmj.com)

# BMJ Open

## **Invasive pneumococcal disease, pneumococcal pneumonia and all-cause pneumonia during COVID-19 in Hong Kong – a retrospective observational study**

|                               |                                                                                                                                                                                                                                                                                                   |
|-------------------------------|---------------------------------------------------------------------------------------------------------------------------------------------------------------------------------------------------------------------------------------------------------------------------------------------------|
| Journal:                      | <i>BMJ Open</i>                                                                                                                                                                                                                                                                                   |
| Manuscript ID                 | bmjopen-2021-055575                                                                                                                                                                                                                                                                               |
| Article Type:                 | Original research                                                                                                                                                                                                                                                                                 |
| Date Submitted by the Author: | 19-Jul-2021                                                                                                                                                                                                                                                                                       |
| Complete List of Authors:     | Chan, King-Pui Florence; Queen Mary Hospital, Department of Medicine<br>Ma, Ting-Fung; University of Wisconsin-Madison, Department of Statistics<br>Ip, Mary; University of Hong Kong<br>Ho, Pak-leung; Queen Mary Hospital, Microbiology; University of Hong Kong, Carol Yu Centre for Infection |
| Keywords:                     | COVID-19, Respiratory infections < THORACIC MEDICINE, Thoracic medicine < INTERNAL MEDICINE, Epidemiology < INFECTIOUS DISEASES, Public health < INFECTIOUS DISEASES                                                                                                                              |
|                               |                                                                                                                                                                                                                                                                                                   |

SCHOLARONE™  
Manuscripts

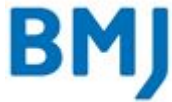

I, the Submitting Author has the right to grant and does grant on behalf of all authors of the Work (as defined in the below author licence), an exclusive licence and/or a non-exclusive licence for contributions from authors who are: i) UK Crown employees; ii) where BMJ has agreed a CC-BY licence shall apply, and/or iii) in accordance with the terms applicable for US Federal Government officers or employees acting as part of their official duties; on a worldwide, perpetual, irrevocable, royalty-free basis to BMJ Publishing Group Ltd ("BMJ") its licensees and where the relevant Journal is co-owned by BMJ to the co-owners of the Journal, to publish the Work in this journal and any other BMJ products and to exploit all rights, as set out in our [licence](#).

The Submitting Author accepts and understands that any supply made under these terms is made by BMJ to the Submitting Author unless you are acting as an employee on behalf of your employer or a postgraduate student of an affiliated institution which is paying any applicable article publishing charge ("APC") for Open Access articles. Where the Submitting Author wishes to make the Work available on an Open Access basis (and intends to pay the relevant APC), the terms of reuse of such Open Access shall be governed by a Creative Commons licence – details of these licences and which [Creative Commons](#) licence will apply to this Work are set out in our licence referred to above.

Other than as permitted in any relevant BMJ Author's Self Archiving Policies, I confirm this Work has not been accepted for publication elsewhere, is not being considered for publication elsewhere and does not duplicate material already published. I confirm all authors consent to publication of this Work and authorise the granting of this licence.

1  
2  
3 1 **Title: Invasive pneumococcal disease, pneumococcal pneumonia and all-cause**  
4 2 **pneumonia during COVID-19 in Hong Kong – a retrospective observational**  
5 3 **study**  
6  
7  
8

9 4  
10  
11 5 King-Pui Florence Chan, MBBS<sup>1</sup>, Ting-Fung Ma, MPhil<sup>2</sup>, Mary Sau-Man Ip<sup>1</sup>, MD,  
12 6 Pak-Leung Ho, MD<sup>3</sup>  
13  
14  
15 7

16  
17  
18 8 **Authors' affiliations:**

- 19  
20  
21 9 1. Department of Medicine, University of Hong Kong, Queen Mary Hospital, Hong  
22 10 Kong SAR, China  
23  
24 11 2. Department of Statistics, University of Wisconsin - Madison, United States of  
25 12 America  
26  
27 13 3. Department of Microbiology, and Carol Yu Centre for Infection, University of Hong  
28 14 Kong, Hong Kong SAR, China  
29  
30

31  
32 15 **ORCID:** [0000-0003-2094-1206](https://orcid.org/0000-0003-2094-1206) (King-Pui Florence Chan); [0000-0001-6028-5640](https://orcid.org/0000-0001-6028-5640)  
33 16 (Ting-Fung Ma); [0000-0002-8692-6933](https://orcid.org/0000-0002-8692-6933) (Mary Sau-Man Ip); [0000-0002-8811-1308](https://orcid.org/0000-0002-8811-1308)  
34 17 (Pak-Leung Ho)  
35  
36  
37 18

38  
39  
40 19 **Correspondence to:**

41  
42 20 Pak-Leung Ho

43  
44 21 Department of Microbiology and Carol Yu Centre for Infection, Queen Mary Hospital,  
45 22 University of Hong Kong, Pokfulam Road, Hong Kong SAR, China

46  
47  
48 23 Email: plho@hku.hk

49  
50  
51 24 Tel: 852-2255-2579  
52  
53  
54  
55  
56  
57  
58  
59  
60

1  
2  
3 26 **Abstract**

4  
5 27 **Objectives:** To compare the incidence and severity of invasive pneumococcal  
6  
7 28 diseases (IPD), pneumococcal pneumonia and pneumonia during COVID-19 period  
8  
9 29 with widely practiced of universal masking and social distancing to that of previous 5  
10  
11 30 years.

12  
13 31 **Design:** Retrospective observational study on incidence of invasive pneumococcal  
14  
15 32 diseases (IPD), pneumococcal pneumonia and all-cause pneumonia between Period  
16  
17 33 1 (January 2015-December 2019) and period 3 (March 2020-March 2021).

18  
19 34 **Setting:** Episode-based data by retrieval of hospitalization records from the Hospital  
20  
21 35 Authority's territory-wide electronic medical record database.

22  
23 36 **Participants:** Hospitalized patients with invasive pneumococcal diseases (IPD)  
24  
25 37 (n=742), pneumococcal pneumonia (n=2163) and all-cause pneumonia (n=453,999)  
26  
27 38 at age 18 or above. Control diagnoses were included to assess confounding from  
28  
29 39 health-seeking behaviors

30  
31 40 **Interventions:** Period 3 with widely practiced of universal masking

32  
33 41 **Primary and secondary outcome:** Primary outcome is the incidence of diseases  
34  
35 42 between two periods. Secondary outcomes include disease severity surrogated by  
36  
37 43 length of stay and mortality.

38  
39 44 **Results:** Monthly average number of IPD, pneumococcal pneumonia and all-cause  
40  
41 45 pneumonia hospitalization significantly decreased by 88.9%, 72.5% and 17.5%  
42  
43 46 (p<0.0005). Change in trend from period 1 to period 3 was -70% (p=0.0025), -43%  
44  
45 47 (p=0.0014) and -11% (p<0.0005). LOS for IPD and pneumococcal pneumonia  
46  
47 48 episodes were insignificantly different in the two periods while that for all-cause  
48  
49 49 pneumonia had a slight decrease from 11.7 days to 10.8 days (p<0.005). No  
50  
51 50 reductions in control diagnoses were observed.

51  
52 51 **Conclusions:** Incidence of IPD, pneumococcal pneumonia, and all-cause pneumonia  
53  
54 52 decreased during COVID-19 pandemic. This was observed with universal masking  
55  
56 53 and social distancing. We proposed this is related to reduce transmission of respiratory  
57  
58 54 viruses and bacteria.

1  
2  
3 56 **Strength and limitations of this study:**  
4

- 5 57 • A territory-wide study with near 100% practice of universal masking  
6  
7 58 • Other factors including temperature and air quality were also included in  
8  
9 59 our analysis  
10  
11 60 • Disease severity of IPD, pneumococcal pneumonia, and all-cause  
12  
13 61 pneumonia were compared between the two periods  
14  
15 62 • Data from private sector (<10%) were not included in our study  
16  
17 63 • The causal relationship cannot be ascertained from this retrospective  
18  
19 64 study  
20

21 66 This research received no specific grant from any funding agency in the public,  
22  
23 67 commercial or not-for-profit sectors.  
24

25  
26 69 There are no competing interests.  
27  
28 70

29 71 **Authors' contributions:**

30  
31 72 **King-Pui Florence Chan and Ting-Fung Ma** were involved in study concept and  
32  
33 73 design; acquisition, analysis and interpretation of data; drafting the work and final  
34  
35 74 approval of the manuscript. **Mary Sau-Man Ip** were involved in critical revision of  
36  
37 75 manuscript for important intellectual content and final approval of the manuscript. **Pak-**  
38  
39 76 **Leung Ho** was involved in study concept and design; analysis and interpretation of  
40  
41 77 data; drafting of manuscript; critical revision of the manuscript for important intellectual  
42  
43 78 content; study supervision; and approval of the final version of the manuscript.  
44

45  
46 80 **Word count:** 3572  
47

48  
49 81 **Keywords:** pneumococcal, COVID-19, masking, regression analysis  
50  
51 82

1  
2  
3 83 **Text**  
4

5  
6 84 **Introduction**  
7

8 85 Coronavirus disease 2019 (COVID-19) due to severe acute respiratory syndrome  
9 86 coronavirus 2 (SARS-CoV-2) infections was first reported in late 2019 [1]. It became  
10 87 a global pandemic and was declared as a public health emergency of international  
11 88 concern on 30 January 2020 by the World Health Organization [2]. As of 21st June  
12 89 2021, more than 178 million people were infected, causing more than 3.8 million  
13 90 deaths globally.

14  
15 91 Pneumococcal disease is caused by *Streptococcus pneumoniae* infection, with at  
16 92 least 100 known serotypes of pneumococci [3]. Pneumococcal disease can be roughly  
17 93 divided into non-invasive disease and invasive disease. Non-invasive disease  
18 94 includes sinusitis, acute otitis media and pneumonia. Invasive pneumococcal disease  
19 95 (IPD) is defined as isolation of *Streptococcus pneumoniae* from a normally sterile sites,  
20 96 including blood and cerebrospinal fluid [4]. IPD is a notifiable disease in Hong Kong  
21 97 since 9th January 2015. Pneumococcal infection is a major cause of morbidity and  
22 98 mortality worldwide [5], with 1.6 million estimated deaths annually in 2005 [6].  
23 99 Incidence of IPD and mortality of pneumococcal pneumonia are higher in extremes of  
24 100 age [7-8].

25  
26 101 The first pneumococcal conjugated vaccine (PCV), Prevnar 7 (PCV7) was  
27 102 introduced to United States in 2000 and incorporated in Hong Kong Childhood  
28 103 Immunisation Programme for children under 2 years old since September 2009. In  
29 104 Hong Kong, PCV7 was replaced by the 10-valent and 13-valent pneumococcal  
30 105 conjugate vaccines (PCV10 and PCV13) in 2010 and 2011 respectively [9-10].  
31 106 PCV13 was effective in preventing vaccine-type pneumococcal pneumonia,  
32 107 bacteraemia and nonbacteraemic community-acquired pneumonia [11]. Decline in  
33 108 incidences of all-cause pneumonia in children and elderly was reported after  
34 109 implementation of PCV in childhood vaccination program [12-13]. 23-valent  
35 110 polysaccharide vaccine (PPSV23) was effective in preventing pneumococcal  
36 111 pneumonia and reducing mortality from pneumococcal pneumonia in nursing home  
37 112 residents [14]. Pneumonia is a common disease causing hospitalization, accounting  
38 113 for 2.9% of all inpatient discharges and death in Hong Kong [15]. It is the second  
39  
40  
41  
42  
43  
44  
45  
46  
47  
48  
49  
50  
51  
52  
53  
54  
55  
56  
57  
58  
59  
60

1  
2  
3 114 leading cause of death with age specific death rates increased markedly after age 65  
4 [16].  
5 115

6 116

7  
8 117 Whether patients with COVID-19 are more susceptible to pneumococcal  
9  
10 118 superinfection is still under debate. Superinfection of pneumococcal in COVID-19  
11  
12 119 patients was reported [17]. Yet, low frequency of bacterial coinfection in patients with  
13  
14 120 early COVID-19 was also observed [18-19]. There is limited evidence on the  
15  
16 121 incidence and severity of IPD, pneumococcal pneumonia, and all-cause pneumonia  
17  
18 122 during COVID-19 pandemic, especially in area where universal masking and social  
19  
20 123 distancing were widely practiced. Since January 2020, universal masking in public  
21  
22 124 area was voluntarily performed by Hong Kong citizens against infection by COVID-  
23  
24 125 19. Cross sectional telephone self-reported surveys by the Hong Kong Public  
25  
26 126 Opinion Research Institute (HKPORI). Percentage of wearing mask was 74.5% on  
27  
28 127 20th-23rd January 2020 (n=1,008), 97.6% on 5th-20th February (n=10,405) and  
29  
30 128 98.9% on 4th-19th March (n=15,739) [20]. On 23rd July 2020, masking was  
31  
32 129 mandatory in public area upon the introduction of Prevention and Control of Disease  
33  
34 130 (Wearing of Mask) Regulation (Cap. 599I). Social distancing measurements were  
35  
36 131 voluntarily practiced by public and implemented by government since 25th January  
37  
38 132 2020. These public health interventions were shown to associated with relatively low  
39  
40 133 rate of COVID-19 and early termination of influenza season in Hong Kong [21]. Our  
41  
42 134 previous studies suggested universal masking and social distancing were associated  
43  
44 135 with significant reduction in acute exacerbation of chronic obstructive pulmonary  
45  
46 136 disease and asthma in Hong Kong [22,23]. In the current study, we hypothesized  
47  
48 137 that the aforementioned COVID-19 related public health interventions and reduction  
49  
50 138 in respiratory virus activities would be associated with reduction in hospitalization  
51  
52 139 due to pneumococcal infections and pneumonia in general.  
53  
54  
55  
56  
57  
58  
59  
60



## 141 **Materials and Methods**

142 A retrospective study assessing the numbers of IPD, pneumococcal pneumonia, and  
143 all-cause pneumonia which required hospital hospitalization during the period of  
144 COVID-19 in Hong Kong, comparing with that in the preceding five years as  
145 baseline. The study period was 1st January 2015 to 31st March 2021 with exclusion  
146 of 1st January 2020 to 28th February 2020 from analysis, when universal masking  
147 was not yet completely executed.

### 149 **Data source**

150 Episode-based data was obtained by retrieval of hospitalization records from the  
151 Hospital Authority's territory-wide electronic medical record database, Clinical Data  
152 Analysis and Reporting System (CDARS), which provides 90% of in-patient hospital  
153 care service in Hong Kong [22,23].

154  
155 Diagnosis code of pneumococcal pneumonia (ICD-9 code 481) was searched on  
156 CDARS. IPD is a notifiable disease since January 2015 with monthly number notified  
157 cases and age obtained from the Department of Health, HKSAR. Monthly number of  
158 influenza virus detection was collected from a territory-wide laboratory surveillance  
159 for both in-patients and out-patients in both public and private medical sectors from  
160 the Centre for Health Protection, HKSAR [15].

161  
162 All-cause pneumonia including the following ICD-9 codes for viral, bacterial,  
163 tuberculous, fungal and unspecified pneumonia, pneumonia due to inhalation of food  
164 or vomitus and lung abscess were obtained from CDARS (ICD-9 code 003.22,  
165 055.1, 0.1160-1.1166, 112.4, 115, 117.3, 480, 481, 482, 483.1, 483.8, 485, 486,  
166 487, 507.0, 513).

### 168 **Patient and public involvement**

169 This observational study based on the practice of universal masking by Hong Kong  
170 citizens to prevent COVID-19 infections and its relationship with hospital admissions  
171 of various diseases, particularly on the infectious disease aided in the development  
172 of the research question. Patients who were admitted with the diagnosis of IPD,  
173 pneumococcal pneumonia, pneumonia, acute kidney injury fracture hip and

1  
2  
3 174 peritonitis due to peritoneal dialysis were included in the study. Demographics data  
4  
5 175 (including sex, age), clinical data (including hospitalization date, length of stay,  
6  
7 176 episode death, date of death) were collected. The results including admission  
8  
9 177 number of various diseases were available in the CHP website and the Hospital  
10 178 Authority Statistics Report [16].  
11

12 179

### 13 180 ***Inclusion/ exclusion criteria***

14  
15 181 Patients with 1) age 18 or above 2) hospitalization for the listed diseases  
16  
17 182 (pneumococcal pneumonia, IPD and pneumonia) were included in the study.  
18

19 183

20 184 Children at aged 0 to 17 years old were excluded in this study. Duplicated record of  
21  
22 185 single patient with different diagnoses in same hospital admission were removed.  
23

24 186

### 25 187 ***Other diagnoses***

26  
27 188 Number of hospitalization for other common medical and surgical conditions including  
28  
29 189 acute kidney injury (ICD-9 code 580, 584), fracture hip (ICD-9 code 820) and peritonitis  
30  
31 190 due to peritoneal dialysis (PD peritonitis) (ICD-9 code 996.68) were collected. These  
32  
33 191 were included to evaluate the possibility of decrease in hospital attendance due to  
34  
35 192 various reasons such as fear of COVID-19 infection in hospital.  
36

37 193

### 38 194 ***Other variables***

39 195 Monthly mean ambient temperature was obtained from the Hong Kong Observatory  
40  
41 196 [24]. Air quality was measured by air quality health index (AQHI), which is calculated  
42  
43 197 based on the cumulative health risk attributable to a 3-hour moving average  
44  
45 198 concentrations of ozone, nitrogen dioxide, sulphur dioxide and particulate matter [25].  
46  
47 199 It was reported in scale of 1 to 10 and 10+ and grouped into five health risk categories,  
48  
49 200 namely low [1-3], moderate [4-6], high [7], very high [8-10] and serious [10+] with  
50  
51 201 different precautionary actions were advised. People with respiratory illness were  
52  
53 202 advised to minimize their outdoor stay when AQHI high to serious. The AQHI was  
54  
55 203 reported hourly in 13 stations located in different area of Hong Kong. The total number  
56  
57 204 of hours with AQHI recorded as high to serious grades were expressed as percentage  
58  
59 205 of total number of hours collected in a month.  
60

206

### 207 ***Statistical method***

1  
2  
3 208 Total number of hospitalizations due to IPD, pneumococcal pneumonia and all-cause  
4 pneumonia were collected and analysed. Each disease was further divided into three  
5 209 different age groups, including 18 to 49 years, 50 to 64 years, and 65 years or above  
6 210 for analysis.  
7 211  
8 212

9 213 Analysis was done on the number of hospitalizations between January 2015 to  
10 214 December 2019, the period prior COVID-19 (period 1) and March 2020 to March  
11 215 2021 (period 3), while January to February 2020 (period 2) was treated as transition  
12 216 period and excluded from the analysis. Wilcoxon rank sum test was first used to  
13 217 analyse the statistical significance of number of hospitalizations between period 1  
14 218 and period 3. Generalized linear models were then applied for statistical inference of  
15 219 various types of responses. Log-linear model was used for studying the effect of  
16 220 pandemic as intervention under segmented regression framework in term of the  
17 221 change in trend (i.e. an increase or decrease in the level of the segment) between  
18 222 period 1 (pre-intervention segment) and period 3 (post-intervention segment) on the  
19 223 monthly hospitalization count [26]. Temporal effect was adjusted by covariates,  
20 224 including AQHI, temperature and effect of masking.  
21 225

22 226 Generalized linear model was used for comparing the mortality rate of individuals  
23 227 between the two time periods [27]. Hospitalization length of stay (LOS) was  
24 228 described in days using mean and standard deviation. Statistical inference of the  
25 229 LOS in hospitalization of individuals was done by Wilcoxon rank sum test with odds  
26 230 ratio and relative risks and confidence intervals calculated [26].  
27 231

28 232 Monthly incidence rate for each disease was calculated using the total population  
29 233 followed by age groups stratification (18 to 49 years, 50 to 64 years and  $\geq 65$  years)  
30 234 and expressed as number per 100,000 person-year. Age-specific population data  
31 235 was obtained from the Census and Statistics Department.  
32 236

### 33 237 ***Ethics Approval***

34 238 The study was approved by the Institutional Review Board of the University of Hong  
35 239 Kong/ Hospital Authority Hong Kong West Cluster (Reference Number UW-21-325).  
36  
37  
38  
39  
40  
41  
42  
43  
44  
45  
46  
47  
48  
49  
50  
51  
52  
53  
54  
55  
56  
57  
58  
59  
60

## 241 Results

### 242 *Invasive pneumococcal disease*

243 The total number of notified IPD episodes was 742 in the entire study, with 699  
244 reported in period 1 and 17 reported in period 3. Pneumococcal serotypes for 684 of  
245 the 699 episodes in period 1, and 13 of the 17 episodes in period 3m were  
246 successfully determined. The proportions attributed to PCV13 serotypes was 66.5%  
247 (465/699) and 29.4% (5/17) respectively for period 1 and period 3. Serotype 3 was  
248 the commonest serotype in both periods, accounting for 41.3% (289/699) and 17.6%  
249 (3/17) of total, respectively. From period 1 to period 3, the monthly number of IPD  
250 caused by PCV13 serotypes declined by 95.1% (95%CI 93.4%-96.4%) while those  
251 for non-PCV13 serotypes declined by 83.0% (95%CI 78.8%-86.5%).

252  
253 Monthly number of IPD peaked in January-February each year except in 2016, with  
254 the peak in April (Figure 1A). Monthly average number of notified IPD episodes was  
255  $11.7 \pm 6.2$  in period 1, with significant decrease to  $1 \pm 4.3$  in period 3 ( $p < 0.0005$ ). By  
256 log-linear model segmented regression, relative risk of IPD in period 3 was 0.85  
257 (95%CI 0.75-0.96,  $p = 0.0089$ ) (Table S1). Further analysis on the relative risk of  
258 different age groups showed significant decline in relative risk of IPD in aged  $\geq 65$   
259 years (0.78, 95%CI 0.61-0.99,  $p = 0.041$ ). Estimated change in trend in the mean  
260 number of cases from period 1 to period 3 was -70% (95%CI -87% to -35%,  
261  $p = 0.0025$ ) (Figure 1A, Table S1).

262  
263 Incidence rate per 100,000 person-years was 2.2 in period 1 and 0.2 in period 3, with  
264 an interval reduction of 88.9% (95%CI 79.8%-98.0%,  $p < 0.0005$ ) (Table 1). IPD is  
265 most prevalent in age  $\geq 65$ . The magnitude of reduction in incidence rate was similar  
266 across different age groups, ranging from 81.3% to 93.5% ( $p < 0.0005$  for all age  
267 groups) (Table 1).

268  
269 The overall LOS for IPD was  $18.8 \pm 48.4$  days in period 1 and  $31.6 \pm 79.2$  days in  
270 period 3 (Table 2), but the difference was statistically insignificant ( $p = 0.89$ ).  
271 Statistically insignificant variations in LOS of different age groups were observed.

272

273

### 274 ***Pneumococcal pneumonia***

275 In the entire study period, there were 2,163 episodes of hospitalization for  
276 pneumococcal pneumonia, with 1970 episodes in period 1 and 119 episodes in  
277 period 3 (Table 1). Monthly number of pneumococcal pneumonia was peaked in  
278 January-February each year except in 2016, with the peak in April (Figure 1B). The  
279 average monthly hospitalizations was  $32.8 \pm 9.9$  episodes in period 1, with significant  
280 drop to  $9.2 \pm 3.9$  episodes in period 3 ( $p < 0.0005$ ). By log-linear model segmented  
281 regression, relative risk of pneumococcal pneumonia was 0.90 (95%CI 0.86-0.95,  
282  $p < 0.005$ ) in period 3. Trend analysis revealed a change of -43% (95%CI -59% to -  
283 19%,  $p = 0.0014$ , Figure 1B, Table S1) from period 1 to period 3. Age groups analysis  
284 showed similar change in trend for all age groups, with statistical significance in  
285 aged  $\geq 65$  years (-41%, 95%CI -61% to -12%,  $p = 0.010$ ) from period 1 to period 3  
286 (Table S1, Figure S1).

287  
288 Overall, the incidence rate of hospitalization for pneumococcal pneumonia  
289 decreased significantly by 72.5% (95%CI 65.9%-79.1%,  $p < 0.0005$ ), from 6.2 per  
290 100,000 person-years in period 1 to 1.7 per 100,000 person-years in period 3 (Table  
291 1). Incidence rate per 100,000 person year showed statistically significant reduction  
292 in all age groups, ranging from 73.0% to 82.5%.

293  
294 The overall LOS for pneumococcal pneumonia in period 1 and period 3 was  
295  $17.7 \pm 27.5$  days and  $19.5 \pm 26.3$  days in all age group ( $p = 0.051$ ) (Table 2). Age group  
296 stratification showed insignificant decrease in length of stay in those aged 18-49  
297 years ( $p = 0.8051$ ) and aged  $\geq 65$  years ( $p = 0.226$ ). Increase in length of stay from  
298  $18.8 \pm 32.6$  days to  $31.7 \pm 48.1$  days was observed in age group 50-64 years, and was  
299 statistically significant ( $p = 0.019$ ). Mortality rate for all ages was 13.1 (95% CI 11.7%-  
300 14.8%) in period 1 and 22.7 (95%CI 15.5%-31.3%) in period 3 ( $p = 0.0187$ ). Mortality  
301 rate was only statistically significant in aged 50-64 years ( $p = 0.0007$ ) but not in aged  
302 18-49 years ( $p = 0.9917$ ) and aged  $\geq 65$  years ( $p = 0.246$ )(Table 2).

### 305 ***All-cause pneumonia***

1  
2  
3 306 In the entire study period, total hospitalization episodes for all-cause pneumonia was  
4  
5 307 453,999, of which 372,660 episodes in period 1 and 67,474 episodes in period 3.  
6  
7 308 Monthly number of all-cause pneumonia peaked in January to March each year  
8  
9 309 (Figure 1C). Mean monthly number of hospitalizations for all-cause pneumonia  
10  
11 310 declined by 16.4% (95%CI 15.7%-17.1%,  $p<0.0005$ ) from  $6211\pm 845.0$  episodes in  
12  
13 311 period 1 to  $5190.3\pm 593.8$  episodes in period 3 ( $p<0.0005$ ) (Figure 1C). Estimated  
14  
15 312 change in trend in the mean number of cases in period 3 was -11% (95%CI -13% to  
16  
17 313 -10%,  $p<0.0005$ ). By log-linear model segmented regression, relative risk of all-  
18  
19 314 cause pneumonia in period 3 compared with period 1 was 0.98 (95%CI 0.98-0.99,  
20  
21 315  $p<0.0005$ ) (Table S1).  
22  
23 316

24  
25 317 Overall, the incidence rate per 100,000 person-years was 1,169.7 in period 1, with  
26  
27 318 17.5% (95%CI 16.8%-18.2%,  $p<0.0005$ ) reduction in period 3 to 964.5 per 100,000  
28  
29 319 person-years in period 3 (Table 1). The incidence rate decrease in period 3  
30  
31 320 compared to period 1 in all age groups.

32  
33 321 The overall LOS for all-cause pneumonia episodes was  $11.7\pm 31.7$  days in period 1  
34  
35 322 and  $10.8\pm 15.0$  days in period 3 ( $p<0.005$ ) (Table 2). Different age groups showed  
36  
37 323 decrease in LOS but were only statistically significant in age 18-49 years and 50-64  
38  
39 324 years. The mortality rate increased from 20.5% (95% CI 20.4%-20.6%) in period 1 to  
40  
41 325 24.2% (95%CI 24.9%-25.6%) in period 3 ( $p<0.005$ ) for all-cause pneumonia. The  
42  
43 326 increase in mortality rate was statistically significant in all age groups (Table 2).  
44  
45 327

### 46 328

### 47 329 **Influenza**

48  
49 330 The total number of influenza A or B viruses detected from January 2015 to March  
50  
51 331 2021 in Hong Kong was 123,732. The monthly number of influenza detections  
52  
53 332 decreased drastically by 99.5% (95%CI 99.4%-99.5%,  $p<0.0005$ ) from  $1,966\pm 2179$  in  
54  
55 333 period 1 to  $10\pm 18$  in period 3 (Figure 1D). The monthly average number of respiratory  
56  
57 334 specimens tested was  $4313\pm 1172$  in period 1 and  $3203\pm 1868$  in period 3.

58  
59 335 By log-linear model segmented regression, relative risk of influenza was 0.92 (95%CI  
60  
336 0.88-0.95,  $p<0.0005$ ). Estimated change in trend in the mean number of detections in  
337  
338 337 period 3 was -99.0% (95%CI -99.3% to -98.7%,  $p<0.0005$ ) of that in period 1 (Figure  
1D)

1  
2  
3 3394  
5 3406  
7 341 ***Other diagnosis: acute kidney injury, PD peritonitis and fracture hip***8  
9 342 The monthly average number of hospitalization episodes for acute kidney injury in10  
11 343 period 1 and period 3 was  $807.8 \pm 87.5$  and  $911.7 \pm 62.6$ , respectively ( $p < 0.0005$ )12  
13 344 (Figure 2) The monthly average number of hospitalization episodes for PD peritonitis14  
15 345 was  $246.7 \pm 27.7$  in period 1 and  $255.9 \pm 31.9$  in period 3 ( $p = 0.23$ ). The monthly16  
17 346 average number of hospitalization episodes for fracture hip was  $432.9 \pm 53.1$  in period18  
19 347 1 and  $417.3 \pm 51.6$  in period 3 ( $p = 0.37$ )  
20  
21  
22  
23  
24  
25  
26  
27  
28  
29  
30  
31  
32  
33  
34  
35  
36  
37  
38  
39  
40  
41  
42  
43  
44  
45  
46  
47  
48  
49  
50  
51  
52  
53  
54  
55  
56  
57  
58  
59  
60



## 349 Discussion

350

351 Hong Kong is a city with population of 7.5 million where universal masking and social  
352 distancing were widely practiced during the COVID-19 pandemic period. This study  
353 showed a drastic decrease in numbers of hospitalization for IPD and pneumococcal  
354 pneumonia and a lesser but still very significant decrease in all cause pneumonia  
355 after anti-COVID-19 measures in March 2020 to March 2021.

356

357 During COVID-19 period, decrease in incidence of IPD were observed in Taiwan and  
358 Singapore [28-29]. The decrease in IPD in Hong Kong was greater magnitude  
359 compare to other countries [30]. Our study added new information on the incidence  
360 and severity of IPD, pneumococcal pneumonia and all-cause pneumonia in terms of  
361 age-stratification.

362

363 Introduction of the current pneumococcal conjugate vaccines has been highly  
364 successful in reducing the incidence of pneumococcal diseases worldwide [31, 32].  
365 Vaccine efficacy of PCV13 against vaccine type IPD in children aged  $\leq 5$  years was  
366 86%-96% [33]. In adults aged  $\geq 65$  years, the vaccine efficacy against vaccine type  
367 IPD was reported as 75% and against vaccine type community-acquired pneumonia  
368 were reported as 45.6% and 72.8% respectively [11, 34]. In contrast, PPV23 only  
369 has vaccine efficacy of 24% against vaccine type community acquired pneumonia in  
370 aged  $\geq 65$  years [35]. In Hong Kong, a marked reduction in vaccine type IPD was  
371 observed in children few years after implementation of PCV in 2009. However, the  
372 indirect effect on adult IPD was not evident. Annual number of adult IPD  
373 hospitalization remains static in period 1 (Figure 1A). Universal masking in Hong  
374 Kong was shown to decrease the incidence of SARS-CoV2 [36-37] and influenza  
375 [38] during the COVID-19 pandemic. Our study showed 88.9% reduction in incidence  
376 of adult IPD. The drastic decrease in incidence of IPD included both vaccine and  
377 non-vaccine types and was comparable and greater than the reported figure after  
378 introduction of pneumococcal vaccines [11,32]. IPD can lead to significant mortality  
379 and morbidity [39]. Our study showed decrease in incidence and trend of IPD and  
380 were statistically significant. The decrease in mortality of IPD during the COVID-19  
381 pandemics was statistically insignificant, which can be contributed by the relative  
382 small sample size.



383

384 The incidence of all-cause pneumonia showed a much lower magnitude of decrease  
385 with the lesser decrease observed in those aged  $\geq 65$  years (supplementary file,  
386 Figure S1C). This can be explained by subgroup of pneumonia due to inhalation of  
387 food or vomitus, i.e. aspiration pneumonia and is more prevalent in age group 65  
388 years old or above. The population of Hong Kong has been seeing an aging trend  
389 and the population of 65 years old or above was 1,114,600 in 2015, and increased to  
390 1,371,800 in 2020. In our study, the lesser decrease in incidence of all-cause  
391 pneumonia in 2019 – 2020 was observed in those aged 65 years or above,  
392 suggesting that the magnitude of decrease in all-cause pneumonia may be limited by  
393 any potential increase in aspiration pneumonia in the expanding number of elderly  
394 people. Secondly, the risk of aspiration pneumonia would not be affected by  
395 measures of universal masking or social distancing, thus reducing their protective  
396 effect on all-cause pneumonia.

397

398 Pneumococcal pneumonia and IPD are debilitating diseases which have been  
399 shown to require long length of hospital stay and high hospital cost [40-41]. The LOS  
400 in pneumococcal pneumonia was slightly increased from 17.7 to 19.5 days but was  
401 statistically insignificant. Looking into different age groups, only patients with age 50  
402 to 64 years old showed statistically significant increase in LOS, while patients in age  
403 group 18 to 49 years old and 65 years old or above showed slight decrease. The  
404 severity of pneumococcal pneumonia can be comparable in the two periods.

405

406 Health seeking behaviour was also evaluated in our study. Admissions of non-  
407 communicable diseases revealed either statistically insignificant decrease in hospital  
408 attendance or statistically significant increase in hospital attendance. Our study  
409 covered more than one year time for COVID-19 pandemics with a relatively stable  
410 number of hospital attendance. Hence, the decrease in incidence of pneumococcal  
411 pneumonia, IPD and all-cause pneumonia cannot be explained by health seeking  
412 behaviour alone.

413

414 Collateral damages were observed during the COVID-19 pandemic [42-43], some of  
415 which were contributed by the decrease in general medical services to concentrate  
416 healthcare resources for the care of SARS-CoV-2 patients and the prevention of

1  
2  
3 417 possible viral spread. However, due to the relatively small number of COVID-19  
4 cases in Hong Kong, provision of acute medical services was minimally disrupted. In  
5 418 our study, the data on admissions for fractures, acute kidney injury and PD peritonitis  
6 419 showed no decrease during the Covid pandemic. Hence the observed decrease in  
7 420 hospital admissions for pneumococcal pneumonia, IPD and all-cause pneumonia  
8 421 should not be artefactual. Masking can be an effective yet low-cost preventive  
9 422 measurement for citizens at high risk of pneumococcal infections.  
10 423  
11 424  
12 425

### 13 426 **Limitations**

14 427 This study is a retrospective observational study and the direct effect of universal  
15 428 masking on pneumococcal pneumonia, IPD and all-cause pneumonia cannot be  
16 429 ascertained. However, our study covered a period of more than one year when  
17 430 universal masking was practiced and a consistent observation of decrease in  
18 431 hospitalization for these diseases were seen. Other factors, namely ambient  
19 432 temperature and AQHI, that might have possible effect on the hospitalization  
20 433 numbers were also included in our analysis.  
21 434

22 435 Our study focused on hospital hospitalization numbers to Hospital Authority. For IPD,  
23 436 the incidence was obtained from Central of Health Protection, HKSAR, which  
24 437 included data from both public and private hospitals data. The LOS and mortality  
25 438 data of IPD were retrieved from the database in Hospital Authority. Admissions to  
26 439 private hospital due to pneumococcal pneumonia and all-cause pneumonia were not  
27 440 included in our study. However, Hospital Authority is the largest healthcare provider  
28 441 in Hong Kong which provides 90% of in-patient services in Hong Kong [44]. Data  
29 442 from Hospital Authority is representable for the general epidemiology of Hong Kong.  
30 443

### 31 444 **Conclusions**

32 445 The incidence of pneumococcal pneumonia, IPD and all-cause pneumonia  
33 446 decreased during COVID-19 pandemics compare to the data in previous five years.  
34 447 This was observed with widely practice of universal masking and social distancing.  
35 448 We propose the decrease is attributed to universal masking and social distancing  
36 449 which reduced the transmission of bacteria or virus and related bacterial  
37 450 superinfection.

## References

1. Wu Z, McGoogan JM. Characteristics of and Important Lessons from the Coronavirus Disease 2019 (COVID-19) Outbreak in China: Summary of a Report of 72314 Cases From the Chinese Center for Disease Control and Prevention. *JAMA*. 2020.
2. World Health Organization statement on the second meeting of the International Health Regulations (2005) Emergency Committee regarding the outbreak of novel coronavirus (2019-nCoV) [https://www.who.int/news/item/30-01-2020-statement-on-the-second-meeting-of-the-international-health-regulations-\(2005\)-emergency-committee-regarding-the-outbreak-of-novel-coronavirus-\(2019-ncov\)](https://www.who.int/news/item/30-01-2020-statement-on-the-second-meeting-of-the-international-health-regulations-(2005)-emergency-committee-regarding-the-outbreak-of-novel-coronavirus-(2019-ncov))
3. Ganaie F, Saad JS, McGee L, van Tonder AJ, Bentley SD, Lo SW, et al. A New Pneumococcal Capsule Type, 10D, is the 100th Serotype and Has a Large *cps* Fragment from an Oral *Streptococcus*. *mBio*. 2020 May 19;11(3):e00937-20.
4. Ludwig E, Bonanni P, Rohde G, Sayiner A, Torres A. The remaining challenges of pneumococcal disease in adults. *Eur Respir Rev*. 2012 Mar 1;21(123):57-65.
5. Drijkoningen JJ, Rohde GG. Pneumococcal infection in adults: burden of disease. *Clin Microbiol Infect*. 2014 May;20 Suppl 5:45-51.
6. World Health Organization Pneumococcal Disease. Available from: <https://www.who.int/ith/diseases/pneumococcal/en/>
7. Burgos J, Luján M, Larrosa MN, Pedro-Botet ML, Fontanals D, Quesada MD, et al. The problem of early mortality in pneumococcal pneumonia: a study of risk factors. *Eur Respir J*. 2015 Aug;46(2):561-4.
8. Chi RC, Jackson LA, Neuzil KM. Characteristics and outcomes of older adults with community-acquired pneumococcal bacteremia. *J Am Geriatr Soc*. 2006 Jan;54(1):115-20.
9. Deloria, K.M., Bennett, J.C., Garcia, Q.M., Kagucia, E.W., Peterson, M.E., Feikin, D.R., et al. Global Landscape Review of Serotype-Specific Invasive Pneumococcal Disease Surveillance among Countries Using PCV10/13: The Pneumococcal Serotype Replacement and Distribution Estimation (PSERENADE) Project. *Microorganisms*. 9.
10. Ho, P.L., Law, P.Y., and Chiu, S.S., 2019. Increase in incidence of invasive pneumococcal disease caused by serotype 3 in children eight years after the introduction of the pneumococcal conjugate vaccine in Hong Kong. *Hum. Vaccin. Immunother*. 15: 455-458.
11. Bonten MJ, Huijts SM, Bolkenbaas M, Webber C, Patterson S, Gault S, et al. Polysaccharide conjugate vaccine against pneumococcal pneumonia in adults. *N Engl J Med*. 2015 Mar 19;372(12):1114-25.
12. López EL, Glatstein E, Ezcurra GC, Iacono M, Teplitz E, Garner AV, et al. Rapid Decrease in Rates of Hospitalization Resulting From Invasive Pneumococcal Disease and Community-

- 1  
2  
3  
4  
5  
6  
7  
8  
9  
10  
11  
12  
13  
14  
15  
16  
17  
18  
19  
20  
21  
22  
23  
24  
25  
26  
27  
28  
29  
30  
31  
32  
33  
34  
35  
36  
37  
38  
39  
40  
41  
42  
43  
44  
45  
46  
47  
48  
49  
50  
51  
52  
53  
54  
55  
56  
57  
58  
59  
60
- Acquired Pneumonia in Children Aged <60 Months After 13-Valent Pneumococcal Conjugate Vaccine Introduction in Argentina. *J Pediatric Infect Dis Soc.* 2018 Feb 19;7(1):30-35.
13. Nieto Guevara J, Daza C, Smith R. Decrease in Hospitalizations for Pneumonia in Children under Five Years of Age in an Indian Reservation in Panama after the Introduction of the Heptavalent Pneumococcal Conjugate Vaccine (PCV7). *Int J Pediatr.* 2013;2013:514578.
14. Maruyama T, Taguchi O, Niederman MS, Morser J, Kobayashi H, Kobayashi T, et al. Efficacy of 23-valent pneumococcal vaccine in preventing pneumonia and improving survival in nursing home residents: double blind, randomised and placebo controlled trial. *BMJ.* 2010 Mar 8;340:c1004.
15. Department of Health Public Health Information System (PHIS)  
[https://www.healthyhk.gov.hk/phিসweb/en/chart\\_detail/26/](https://www.healthyhk.gov.hk/phিসweb/en/chart_detail/26/)
16. Centre for Health Protection, Department of Health, Hong Kong Special Administrative Region.  
<https://www.chp.gov.hk/>
17. Cucchiari D, Pericàs JM, Riera J, Gumucio R, Md EC, Nicolás D; Hospital Clínic 4H Team. Pneumococcal superinfection in COVID-19 patients: A series of 5 cases. *Med Clin (Barc).* 2020 Dec 11;155(11):502-505.
18. Karami Z, Knoop BT, Dofferhoff ASM, Blaauw MJT, Janssen NA, van Apeldoorn M, et al. Few bacterial co-infections but frequent empiric antibiotic use in the early phase of hospitalized patients with COVID-19: results from a multicentre retrospective cohort study in The Netherlands. *Infect Dis (Lond).* 2021 Feb;53(2):102-110.
19. Hughes S, Troise O, Donaldson H, Mughal N, Moore LSP. Bacterial and fungal coinfection among hospitalized patients with COVID-19: a retrospective cohort study in a UK secondary-care setting. *Clin Microbiol Infect.* 2020 Oct;26(10):1395-1399.
20. Community Health Module Research Reports, Hong Kong Public Opinion Research Institute. Available from: <https://www.pori.hk/research-reports>
21. Chan KH, Lee PW, Chan CY, Lam KBH, Ho PL. Monitoring respiratory infections in covid-19 epidemics. *BMJ.* 2020;369:m1628.
22. Chan KPF, Ma TF, Kwok WC, Leung JKC, Chiang KY, Ho JCM, et al. Significant reduction in hospital admissions for acute exacerbation of chronic obstructive pulmonary disease in Hong Kong during coronavirus disease 2019 pandemic. *Respir Med.* 2020 Sep;171:106085.
23. Chan KPF, Kwok WC, Ma TF, Hui CH, Tam TC, Wang JK, et al. Territory-wide Study on Hospital Admissions for Asthma exacerbation in COVID-19 Pandemic. *Ann Am Thorac Soc.* 2021 Feb 26.
24. Hong Kong Observatory. <https://www.hko.gov.hk/en/wxinfo/pastwx/mws/mws.htm>
25. Air Quality Health Index monthly summary. <https://www.aqhi.gov.hk/en/aqhi/statistics-of-aqhi/aqhi-monthly-summary.html>

26. Wagner AK, Soumerai SB, Zhang F, Ross-Degnan D. Segmented regression analysis of interrupted time series studies in medication use research. *J Clin Pharm Ther.* 2002 Aug;27(4):299-309.
27. A. Agresti (2012). *Categorical Data Analysis*, 3rd Edition. Wiley
28. Lim RH, Chow A, Ho HJ. Decline in pneumococcal disease incidence in the time of COVID-19 in Singapore. *J Infect.* 2020;81(6):e19-e21.
29. Juan HC, Chao CM, Lai CC, Tang HJ. Decline in invasive pneumococcal disease during COVID-19 pandemic in Taiwan. *J Infect.* 2021 Feb;82(2):282-327.
30. Teng JLL, Fok KMN, Lin KPK, Chan E, Ma Y, Lau SKP, Woo PCY. Substantial decline in invasive pneumococcal disease (IPD) during COVID-19 pandemic in Hong Kong. *Clin Infect Dis.* 2021 Apr 27:ciab382.
31. Bennett JC, Hetrich MK, Garcia Quesada M, Sinkevitch JN, Deloria Knoll M, Feikin DR, et al. Changes in Invasive Pneumococcal Disease Caused by *Streptococcus pneumoniae* Serotype 1 Following Introduction of PCV10 and PCV13: Findings from the PSERENADE Project. *Microorganisms.* 2021 Mar 27;9(4):696.
32. Waight PA, Andrews NJ, Ladhani SN, Sheppard CL, Slack MP, Miller E. Effect of the 13-valent pneumococcal conjugate vaccine on invasive pneumococcal disease in England and Wales 4 years after its introduction: an observational cohort study. *Lancet Infect Dis.* 2015 May;15(5):535-43.
33. Berman-Rosa M, O'Donnell S, Barker M, Quach C. Efficacy and Effectiveness of the PCV-10 and PCV-13 Vaccines Against Invasive Pneumococcal Disease. *Pediatrics.* 2020 Apr;145(4):e20190377.
34. McLaughlin JM, Jiang Q, Isturiz RE, Singhs HL, Swerdlow DL, Gessner BD et al. Effectiveness of 13-Valent Pneumococcal Conjugate Vaccine Against Hospitalization for Community-Acquired Pneumonia in Older US Adults: A Test-Negative Design. *Clin Infect Dis.* 2018 Oct 30;67(10):1498-1506.
35. Lawrence H, Pick H, Baskaran V, Daniel P, Rodrigo C, Ashton D et al. Effectiveness of the 23-valent pneumococcal polysaccharide vaccine against vaccine serotype pneumococcal pneumonia in adults: A case-control test-negative design study. *PLoS Med.* 2020 Oct 23;17(10):e1003326.
36. Cheng VC, Wong SC, Chuang VW, So SY, Chen JH, Sridhar S et al. The role of community-wide wearing of face mask for control of coronavirus disease 2019 (COVID-19) epidemic due to SARS-CoV-2. *J Infect.* 2020 Jul;81(1):107-114.
37. Chan JF, Yuan S, Zhang AJ, Poon VK, Chan CC, Lee AC et al. Surgical Mask Partition Reduces the Risk of Noncontact Transmission in a Golden Syrian Hamster Model for Coronavirus Disease 2019 (COVID-19). *Clin Infect Dis.* 2020 Nov 19;71(16):2139-2149.

38. Wong SC, Lam GK, AuYeung CH, Chan VW, Wong NL, So SY et al. Absence of nosocomial influenza and respiratory syncytial virus infection in the coronavirus disease 2019 (COVID-19) era: Implication of universal masking in hospitals. *Infect Control Hosp Epidemiol*. 2021 Feb;42(2):218-221.
39. Chan T, Tay MZ, Kyaw WM, Chow A, Ho HJ. Epidemiology, vaccine effectiveness, and risk factors for mortality for pneumococcal disease among hospitalised adults in Singapore: a case-control study. *BMC Infect Dis*. 2020 Jun 17;20(1):423.
40. Darbà J, Marsà A. Hospital incidence, in-hospital mortality and medical costs of pneumococcal disease in Spain (2008-2017): a retrospective multicentre study. *Curr Med Res Opin*. 2021 Mar;37(3):523-530.
41. Brotons P, Gelabert G, Launes C, Sicuri E, Pallares R, Muñoz-Almagro C. Cost of hospitalizing children with invasive pneumococcal pneumonia. *Vaccine*. 2013 Feb 4;31(7):1117-22.
42. Bersano A, Kraemer M, Touzé E, Weber R, Alamowitch S, Sibon I et al. Stroke care during the COVID-19 pandemic: experience from three large European countries. *Eur J Neurol*. 2020 Sep;27(9):1794-1800.
43. Del Vecchio Blanco G, Calabrese E, Biancone L, Monteleone G, Paoluzi OA. The impact of COVID-19 pandemic in the colorectal cancer prevention. *Int J Colorectal Dis*. 2020 Oct;35(10):1951-1954.
44. Hospital Authority Statistical Report. Available from: <https://www3.ha.org.hk/data/HAStatistics/DownloadReport/2>.



**Table 1.** Incidence and number per 100,000 person year of pneumococcal pneumonia, invasive pneumococcal disease (IPD) and pneumonia

| Disease <sup>a</sup>     | All ages        |                                         | 18-49 years     |                                         | 50-64 years     |                                         | ≥65 years    |                                         |
|--------------------------|-----------------|-----------------------------------------|-----------------|-----------------------------------------|-----------------|-----------------------------------------|--------------|-----------------------------------------|
|                          | No. of episodes | Incidence rate per 100,000 person-years | No. of episodes | Incidence rate per 100,000 person-years | No. of episodes | Incidence rate per 100,000 person-years | No. of cases | Incidence rate per 100,000 person-years |
| IPD                      |                 |                                         |                 |                                         |                 |                                         |              |                                         |
| Period 1                 | 699             | 2.2                                     | 125             | 0.7                                     | 195             | 2.2                                     | 379          | 6.2                                     |
| Period 2                 | 26              | 2.4                                     | 5               | 0.9                                     | 6               | 2.0                                     | 15           | 6.6                                     |
| Period 3                 | 17              | 0.2                                     | 3               | 0.08                                    | 8               | 0.4                                     | 6            | 0.4                                     |
| % reduction <sup>b</sup> |                 | 88.9% (79.8%-98.0%) <sup>***</sup>      |                 | 88.6% (66.8%-110.4%) <sup>***</sup>     |                 | 81.3% (62.1%-100.4%) <sup>***</sup>     |              | 93.5% (82.2%-104.8%) <sup>***</sup>     |
| Pneumococcal pneumonia   |                 |                                         |                 |                                         |                 |                                         |              |                                         |
| Period 1                 | 1,970           | 6.2                                     | 217             | 1.3                                     | 435             | 4.9                                     | 1,318        | 21.7                                    |
| Period 2                 | 74              | 6.9                                     | 11              | 2.0                                     | 14              | 4.7                                     | 49           | 32.4                                    |
| Period 3                 | 119             | 1.7                                     | 8               | 0.2                                     | 24              | 1.2                                     | 87           | 5.9                                     |
| % reduction              |                 | 72.5% (65.9%-79.1%) <sup>***</sup>      |                 | 82.5% (64.5%-100.5%) <sup>***</sup>     |                 | 74.8% (61.0%-88.6%) <sup>***</sup>      |              | 73.0% (65.2%-80.8%) <sup>***</sup>      |
| All-cause pneumonia      |                 |                                         |                 |                                         |                 |                                         |              |                                         |
| Period 1                 | 372,660         | 1169.7                                  | 19,502          | 115.3                                   | 38,360          | 432.4                                   | 314,798      | 5177.1                                  |
| Period 2                 | 13,865          | 1288.2                                  | 843             | 153.6                                   | 1,448           | 484.6                                   | 11,574       | 5062.3                                  |
| Period 3                 | 67,474          | 964.5                                   | 2,473           | 69.3                                    | 6,181           | 318.3                                   | 58,820       | 3958.0                                  |
| % reduction              |                 | 17.5% (16.8%-18.2%) <sup>***</sup>      |                 | 39.9% (37.1%-42.7%) <sup>***</sup>      |                 | 26.4% (24.3%-28.5%) <sup>***</sup>      |              | 23.5% (22.8%-24.3%) <sup>***</sup>      |

<sup>a</sup>Period 1, January 2015 to December 2019 (before covid-19); period 2, January 2020 to February 2020 (transition period); period 3 March 2020 to March 2021 (post-COVID-19).

<sup>b</sup> Percentage reduction in period 3 relative to period 1 as the baseline

\*p < 0.05 to 0.01, \*\*p < 0.01 to 0.005, \*\*\*p < 0.005

**Table 2.** Mean length of stay and mortality rate of pneumococcal pneumonia, invasive pneumococcal disease (IPD) and pneumonia in the periods

|                               | Mean length of stay (days) |                |               |             | Mortality rate (%) |               |                    |                    |
|-------------------------------|----------------------------|----------------|---------------|-------------|--------------------|---------------|--------------------|--------------------|
|                               | All ages                   | 18-49 years    | 50-64 years   | ≥65 years   | All ages           | 18-49 years   | 50-64 years        | ≥65 years          |
| <b>IPD</b>                    |                            |                |               |             |                    |               |                    |                    |
| Period 1                      | 18.8 ± 48.4                | 27.9 ± 102.8   | 17.7 ± 19.1   | 15.9 ± 18.9 | 12.1(8.8-16.1)     | 9.1(3.4-18.7) | 8.4(3.7-15.9)      | 15.3(10.3-21.4)    |
| Period 3                      | 31.6 ± 79.2                | 6.3 ± 5.2      | 76.4 ± 140.3  | 14.1 ± 9.9  | 6.3(1.6-30.2)      | 0.0           | 0.0                | 14.3(3.6-57.9)     |
| <b>Pneumococcal Pneumonia</b> |                            |                |               |             |                    |               |                    |                    |
| Period 1                      | 17.7 ± 27.5                | 16.9 ± 28.0    | 18.8 ± 32.6*  | 17.5 ± 25.6 | 13.1(11.7-14.8)*   | 4.2(1.9-7.7)  | 7.5(5.3-10.5)**    | 16.3(13.6-18.7)    |
| Period 3                      | 19.5 ± 26.3                | 13.6 ± 15.6    | 31.7 ± 48.1*  | 16.8 ± 16.6 | 22.7(15.5-31.3)*   | 0.0           | 29.2(12.6-51.1)**  | 23.0(14.6-33.2)    |
| <b>All-cause pneumonia</b>    |                            |                |               |             |                    |               |                    |                    |
| Period 1                      | 11.7 ± 31.7***             | 10.3 ± 42.5*** | 13.4 ± 45.1** | 11.7 ± 28.9 | 20.5(20.4-20.6)*** | 5.3(4.9-5.6)* | 13.0(11.4-12.0)*** | 22.4(22.2-22.4)*** |
| Period 3                      | 10.8 ± 15.0***             | 9.4 ± 16.5***  | 11.9 ± 20.1** | 10.7 ± 14.3 | 24.2(24.9-25.6)*** | 6.8(5.9-7.9)* | 16.1(5.2-17.0)***  | 27.0(26.6-27.3)*** |

\*p <0.05 to 0.01, \*\*p <0.01 to 0.005, \*\*\*p<0.005



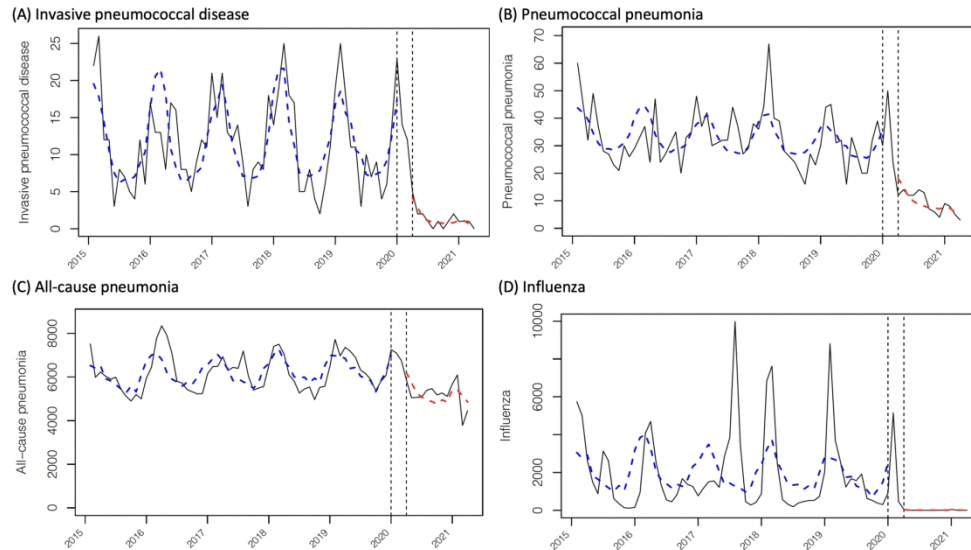

Figure 1. Trend analysis of monthly numbers of invasive pneumococcal disease (IPD), pneumococcal pneumonia, all-cause pneumonia, and influenza in Hong Kong, January 2015 to March 2021. Numbers of IPD were those obtained through mandatory notification. Numbers of pneumococcal pneumonia and all-cause pneumonia were territory-wide hospitalizations by discharge diagnoses. Numbers of influenza viruses were those detected in respiratory specimens in a territory-wide laboratory surveillance.

419x237mm (144 x 144 DPI)

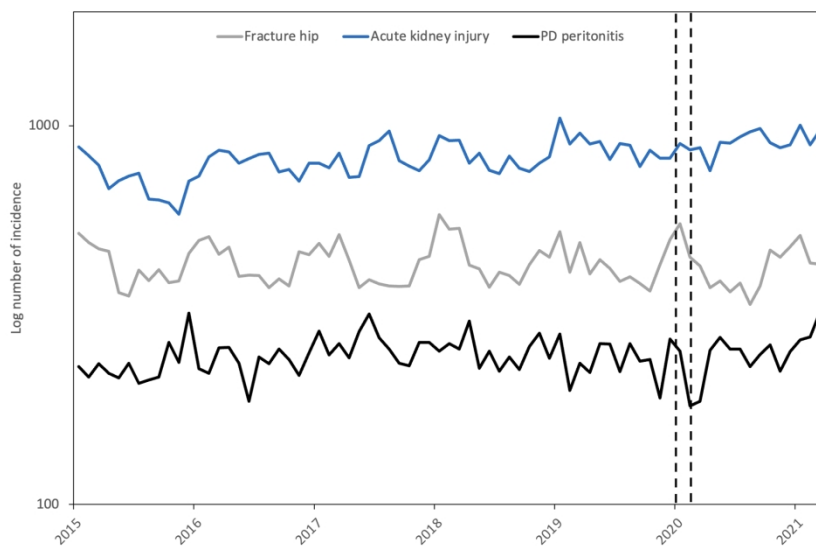

Figure 2. Admission numbers of fracture hip, acute kidney injury and PD peritonitis.

419x237mm (144 x 144 DPI)

## Supplementary file.

**Figure S1.** Trend analysis of monthly number of (A) age-stratified hospitalizations for invasive pneumococcal disease, (B) age-stratified hospitalizations for pneumococcal pneumonia, (C) age-stratified hospitalizations for and (D) monthly percentage of air quality health index (AQHI) high to serious and (E) monthly average ambient temperature.

### (A) Invasive pneumococcal disease

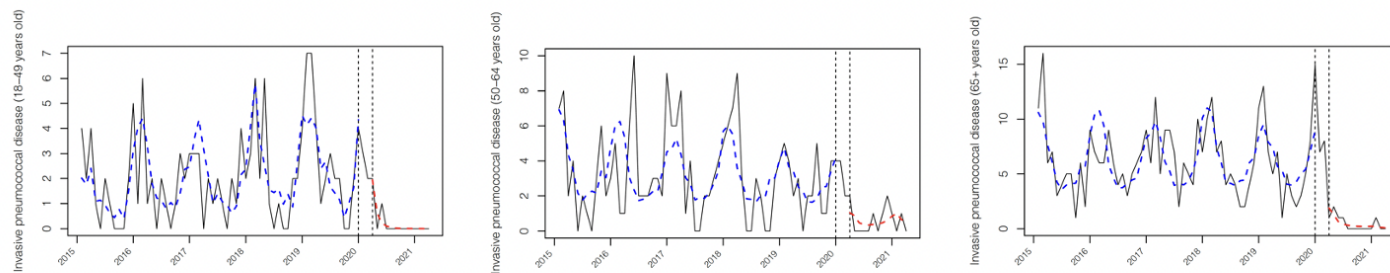

### (B) Pneumococcal pneumonia

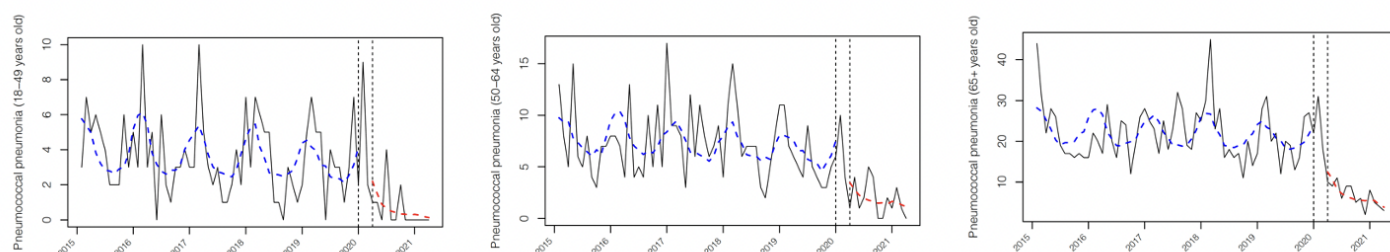

### (C) All cause pneumonia

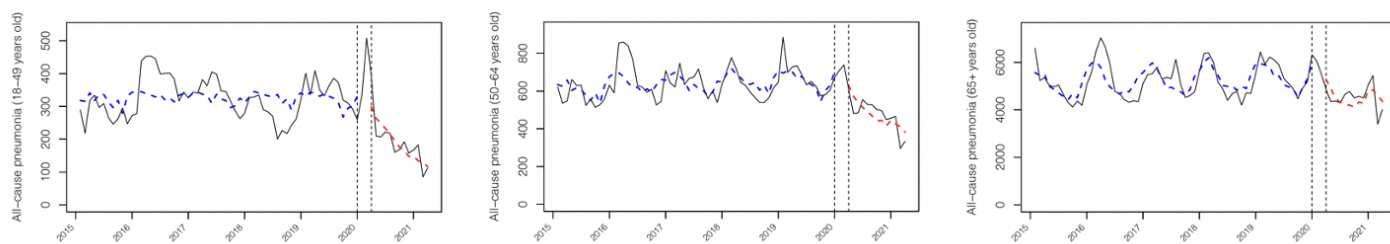

### (D) Monthly % of AQHI high to serious

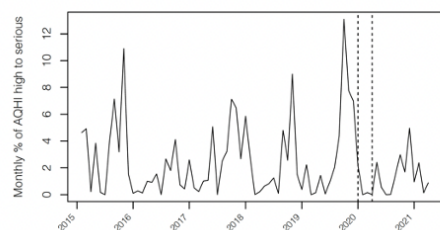

### (E) Monthly average temperature

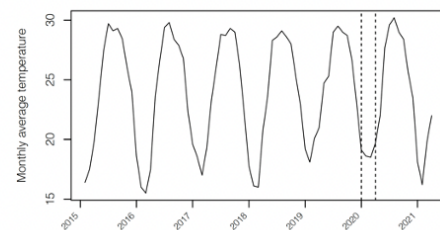

**Table S1.** Trend analysis of monthly number of hospitalization by age groups in periods before and after the COVID-19 pandemic

|                                   | Relative risk (95% CI)   |                          | Change in trend#               |
|-----------------------------------|--------------------------|--------------------------|--------------------------------|
|                                   | Period 1 ^               | Period 3^                |                                |
| <b>IPD</b>                        |                          |                          |                                |
| All ages                          | 1.0020 (0.9977-1.064)    | 0.8484 (0.7501-0.9597)** | -70.39% (-86.55% to -34.73%)** |
| 18-49 years                       | 1.0129 (1.0022-1.0238)   | 0.5272 (0.2176-1.2772)   | -31.27% (-89.72% to 359.72%)   |
| 50-64 years                       | 0.9969 (0.9888-1.0051)   | 0.9585 (0.8087-1.1362)   | -70.43% (-92.80% to 21.42%)    |
| 65 years or above                 | 1.0012 (0.9953-1.0071)   | 0.7777 (0.6111-0.9897)*  | -70.83% (-91.59% to 1.12%)     |
| <b>Pneumococcal<br/>Pneumonia</b> |                          |                          |                                |
| All ages                          | 0.9978(0.9953-1.0004)    | 0.9042(0.8621-0.9483)*** | -42.79% (-59.36% to -19.48%)*  |
| 18-49 years                       | 0.9964(0.9887-1.0042)    | 0.6768(0.2171-2.1093)    | -32.32% (-78.29% to 110.93%)   |
| 50-64 years                       | 0.9962(0.9907-1.0017)    | 0.9174(0.8260-1.0189)    | -50.21% (-76.93% to 7.48%)     |
| 65 years or above                 | 0.9986(0.9954-1.0017)    | 0.9107(0.8612-0.9640)*   | -41.19% (-60.82% to -11.73%)*  |
| <b>All-cause pneumonia</b>        |                          |                          |                                |
| All ages                          | 1.0014(1.0012-1.0016)*** | 0.9835(0.9815-0.9855)*** | -11.24% (-12.76% to -9.7%)***  |
| 18-49 years                       | 1.0000(0.9992-1.0008)    | 0.9263(0.9164-0.9364)*** | -6.05% (-13.41% to 1.94%)      |
| 50-64 years                       | 1.0015(1.0009-1.0021)*** | 0.9620(0.9556-0.9684)*** | -9.32% (-14.14% to -4.22%)***  |
| 65 years or above                 | 1.0011(1.0009-1.0013)*** | 0.9879(0.9858-0.9901)*** | -13.30% (-12.94% to -9.64%)*** |

^Trend in period 1 (January 2015 to December 2019) and 3 (March 2020 to March 2021), the (relative risk expressed the month-to-month change in hospitalization numbers

#Estimate the change in trend in the mean monthly number of cases in period 3, compare with the monthly trend in period 1

\*p <0.05 to 0.01, \*\*p <0.01 to 0.005, \*\*\*p<0.005

## STROBE Statement—checklist of items that should be included in reports of observational studies

|                              | Item No | Recommendation                                                                                                                                                                                                                                                                                                                                                                                                                                                         | Page No |
|------------------------------|---------|------------------------------------------------------------------------------------------------------------------------------------------------------------------------------------------------------------------------------------------------------------------------------------------------------------------------------------------------------------------------------------------------------------------------------------------------------------------------|---------|
| <b>Title and abstract</b>    | 1       | (a) Indicate the study's design with a commonly used term in the title or the abstract                                                                                                                                                                                                                                                                                                                                                                                 | 1       |
|                              |         | (b) Provide in the abstract an informative and balanced summary of what was done and what was found                                                                                                                                                                                                                                                                                                                                                                    | 2       |
| <b>Introduction</b>          |         |                                                                                                                                                                                                                                                                                                                                                                                                                                                                        |         |
| Background/rationale         | 2       | Explain the scientific background and rationale for the investigation being reported                                                                                                                                                                                                                                                                                                                                                                                   | 4       |
| Objectives                   | 3       | State specific objectives, including any prespecified hypotheses                                                                                                                                                                                                                                                                                                                                                                                                       | 5       |
| <b>Methods</b>               |         |                                                                                                                                                                                                                                                                                                                                                                                                                                                                        |         |
| Study design                 | 4       | Present key elements of study design early in the paper                                                                                                                                                                                                                                                                                                                                                                                                                | 6       |
| Setting                      | 5       | Describe the setting, locations, and relevant dates, including periods of recruitment, exposure, follow-up, and data collection                                                                                                                                                                                                                                                                                                                                        | 6,7     |
| Participants                 | 6       | (a) <i>Cohort study</i> —Give the eligibility criteria, and the sources and methods of selection of participants. Describe methods of follow-up<br><i>Case-control study</i> —Give the eligibility criteria, and the sources and methods of case ascertainment and control selection. Give the rationale for the choice of cases and controls<br><i>Cross-sectional study</i> —Give the eligibility criteria, and the sources and methods of selection of participants | 6,7     |
|                              |         | (b) <i>Cohort study</i> —For matched studies, give matching criteria and number of exposed and unexposed<br><i>Case-control study</i> —For matched studies, give matching criteria and the number of controls per case                                                                                                                                                                                                                                                 | 6,7     |
| Variables                    | 7       | Clearly define all outcomes, exposures, predictors, potential confounders, and effect modifiers. Give diagnostic criteria, if applicable                                                                                                                                                                                                                                                                                                                               | 6,7     |
| Data sources/<br>measurement | 8*      | For each variable of interest, give sources of data and details of methods of assessment (measurement). Describe comparability of assessment methods if there is more than one group                                                                                                                                                                                                                                                                                   | 6,7     |
| Bias                         | 9       | Describe any efforts to address potential sources of bias                                                                                                                                                                                                                                                                                                                                                                                                              | 7       |
| Study size                   | 10      | Explain how the study size was arrived at                                                                                                                                                                                                                                                                                                                                                                                                                              | 6       |
| Quantitative variables       | 11      | Explain how quantitative variables were handled in the analyses. If applicable, describe which groupings were chosen and why                                                                                                                                                                                                                                                                                                                                           | 7,8     |
| Statistical methods          | 12      | (a) Describe all statistical methods, including those used to control for confounding                                                                                                                                                                                                                                                                                                                                                                                  | 7,8     |
|                              |         | (b) Describe any methods used to examine subgroups and interactions                                                                                                                                                                                                                                                                                                                                                                                                    | 7,8     |
|                              |         | (c) Explain how missing data were addressed                                                                                                                                                                                                                                                                                                                                                                                                                            | N/A     |
|                              |         | (d) <i>Cohort study</i> —If applicable, explain how loss to follow-up was addressed<br><i>Case-control study</i> —If applicable, explain how matching of cases and controls was addressed<br><i>Cross-sectional study</i> —If applicable, describe analytical methods taking account of sampling strategy                                                                                                                                                              | N/A     |
|                              |         | (e) Describe any sensitivity analyses                                                                                                                                                                                                                                                                                                                                                                                                                                  | 7,8     |

Continued on next page

| <b>Results</b>           |     |                                                                                                                                                                                                              |       |
|--------------------------|-----|--------------------------------------------------------------------------------------------------------------------------------------------------------------------------------------------------------------|-------|
| Participants             | 13* | (a) Report numbers of individuals at each stage of study—eg numbers potentially eligible, examined for eligibility, confirmed eligible, included in the study, completing follow-up, and analysed            | 9-12  |
|                          |     | (b) Give reasons for non-participation at each stage                                                                                                                                                         | N/A   |
|                          |     | (c) Consider use of a flow diagram                                                                                                                                                                           | N/A   |
| Descriptive data         | 14* | (a) Give characteristics of study participants (eg demographic, clinical, social) and information on exposures and potential confounders                                                                     | 9-12  |
|                          |     | (b) Indicate number of participants with missing data for each variable of interest                                                                                                                          | N/A   |
|                          |     | (c) <i>Cohort study</i> —Summarise follow-up time (eg, average and total amount)                                                                                                                             |       |
| Outcome data             | 15* | <i>Cohort study</i> —Report numbers of outcome events or summary measures over time                                                                                                                          | 9-12  |
|                          |     | <i>Case-control study</i> —Report numbers in each exposure category, or summary measures of exposure                                                                                                         |       |
|                          |     | <i>Cross-sectional study</i> —Report numbers of outcome events or summary measures                                                                                                                           |       |
| Main results             | 16  | (a) Give unadjusted estimates and, if applicable, confounder-adjusted estimates and their precision (eg, 95% confidence interval). Make clear which confounders were adjusted for and why they were included | 9-12  |
|                          |     | (b) Report category boundaries when continuous variables were categorized                                                                                                                                    |       |
|                          |     | (c) If relevant, consider translating estimates of relative risk into absolute risk for a meaningful time period                                                                                             |       |
| Other analyses           | 17  | Report other analyses done—eg analyses of subgroups and interactions, and sensitivity analyses                                                                                                               | 9-12  |
| <b>Discussion</b>        |     |                                                                                                                                                                                                              |       |
| Key results              | 18  | Summarise key results with reference to study objectives                                                                                                                                                     | 13    |
| Limitations              | 19  | Discuss limitations of the study, taking into account sources of potential bias or imprecision. Discuss both direction and magnitude of any potential bias                                                   | 15    |
| Interpretation           | 20  | Give a cautious overall interpretation of results considering objectives, limitations, multiplicity of analyses, results from similar studies, and other relevant evidence                                   | 13-15 |
| Generalisability         | 21  | Discuss the generalisability (external validity) of the study results                                                                                                                                        | 13,14 |
| <b>Other information</b> |     |                                                                                                                                                                                                              |       |
| Funding                  | 22  | Give the source of funding and the role of the funders for the present study and, if applicable, for the original study on which the present article is based                                                | 3     |

\*Give information separately for cases and controls in case-control studies and, if applicable, for exposed and unexposed groups in cohort and cross-sectional studies.

**Note:** An Explanation and Elaboration article discusses each checklist item and gives methodological background and published examples of transparent reporting. The STROBE checklist is best used in conjunction with this article (freely available on the Web sites of PLoS Medicine at <http://www.plosmedicine.org/>, Annals of Internal Medicine at <http://www.annals.org/>, and Epidemiology at <http://www.epidem.com/>). Information on the STROBE Initiative is available at [www.strobe-statement.org](http://www.strobe-statement.org).

# BMJ Open

## **Invasive pneumococcal disease, pneumococcal pneumonia and all-cause pneumonia in Hong Kong during the COVID-19 pandemic compared with the preceding 5 years: a retrospective observational study**

|                                 |                                                                                                                                                                                                                                                                                                   |
|---------------------------------|---------------------------------------------------------------------------------------------------------------------------------------------------------------------------------------------------------------------------------------------------------------------------------------------------|
| Journal:                        | <i>BMJ Open</i>                                                                                                                                                                                                                                                                                   |
| Manuscript ID                   | bmjopen-2021-055575.R1                                                                                                                                                                                                                                                                            |
| Article Type:                   | Original research                                                                                                                                                                                                                                                                                 |
| Date Submitted by the Author:   | 30-Aug-2021                                                                                                                                                                                                                                                                                       |
| Complete List of Authors:       | Chan, King-Pui Florence; Queen Mary Hospital, Department of Medicine<br>Ma, Ting-Fung; University of Wisconsin-Madison, Department of Statistics<br>Ip, Mary; University of Hong Kong<br>Ho, Pak-leung; Queen Mary Hospital, Microbiology; University of Hong Kong, Carol Yu Centre for Infection |
| <b>Primary Subject Heading</b>: | Infectious diseases                                                                                                                                                                                                                                                                               |
| Secondary Subject Heading:      | Epidemiology, Public health, Respiratory medicine                                                                                                                                                                                                                                                 |
| Keywords:                       | COVID-19, Respiratory infections < THORACIC MEDICINE, Thoracic medicine < INTERNAL MEDICINE, Epidemiology < INFECTIOUS DISEASES, Public health < INFECTIOUS DISEASES                                                                                                                              |
|                                 |                                                                                                                                                                                                                                                                                                   |

SCHOLARONE™  
Manuscripts



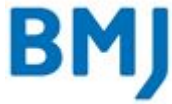

I, the Submitting Author has the right to grant and does grant on behalf of all authors of the Work (as defined in the below author licence), an exclusive licence and/or a non-exclusive licence for contributions from authors who are: i) UK Crown employees; ii) where BMJ has agreed a CC-BY licence shall apply, and/or iii) in accordance with the terms applicable for US Federal Government officers or employees acting as part of their official duties; on a worldwide, perpetual, irrevocable, royalty-free basis to BMJ Publishing Group Ltd ("BMJ") its licensees and where the relevant Journal is co-owned by BMJ to the co-owners of the Journal, to publish the Work in this journal and any other BMJ products and to exploit all rights, as set out in our [licence](#).

The Submitting Author accepts and understands that any supply made under these terms is made by BMJ to the Submitting Author unless you are acting as an employee on behalf of your employer or a postgraduate student of an affiliated institution which is paying any applicable article publishing charge ("APC") for Open Access articles. Where the Submitting Author wishes to make the Work available on an Open Access basis (and intends to pay the relevant APC), the terms of reuse of such Open Access shall be governed by a Creative Commons licence – details of these licences and which [Creative Commons](#) licence will apply to this Work are set out in our licence referred to above.

Other than as permitted in any relevant BMJ Author's Self Archiving Policies, I confirm this Work has not been accepted for publication elsewhere, is not being considered for publication elsewhere and does not duplicate material already published. I confirm all authors consent to publication of this Work and authorise the granting of this licence.



1  
2  
3 1 **Title: Invasive pneumococcal disease, pneumococcal pneumonia and all-cause**  
4 2 **pneumonia in Hong Kong during the COVID-19 pandemic compared with the**  
5 3 **preceding 5 years: a retrospective observational study**  
6  
7  
8

9 4  
10  
11 5 King-Pui Florence Chan, MBBS<sup>1</sup>, Ting-Fung Ma, MPhil<sup>2</sup>, Mary Sau-Man Ip<sup>1</sup>, MD,  
12 6 Pak-Leung Ho, MD<sup>3</sup>  
13  
14  
15 7

16  
17  
18 8 **Authors' affiliations:**

- 19  
20  
21 9 1. Department of Medicine, University of Hong Kong, Queen Mary Hospital, Hong  
22 10 Kong SAR, China  
23  
24 11 2. Department of Statistics, University of Wisconsin - Madison, United States of  
25 12 America  
26  
27 13 3. Department of Microbiology, and Carol Yu Centre for Infection, University of Hong  
28 14 Kong, Hong Kong SAR, China  
29  
30

31  
32 15 **ORCID:** [0000-0003-2094-1206](https://orcid.org/0000-0003-2094-1206) (King-Pui Florence Chan); [0000-0001-6028-5640](https://orcid.org/0000-0001-6028-5640)  
33 16 (Ting-Fung Ma); [0000-0002-8692-6933](https://orcid.org/0000-0002-8692-6933) (Mary Sau-Man Ip); [0000-0002-8811-1308](https://orcid.org/0000-0002-8811-1308)  
34 17 (Pak-Leung Ho)  
35  
36  
37 18

38  
39  
40 19 **Correspondence to:**

41  
42 20 Pak-Leung Ho

43  
44 21 Department of Microbiology and Carol Yu Centre for Infection, Queen Mary Hospital,  
45 22 University of Hong Kong, Pokfulam Road, Hong Kong SAR, China

46  
47  
48 23 Email: [plho@hku.hk](mailto:plho@hku.hk)

49  
50  
51 24 Tel: 852-2255-2579  
52  
53  
54  
55  
56  
57  
58  
59  
60

## 26 **Abstract**

27 **Objectives:** To compare the incidence and severity of invasive pneumococcal  
28 diseases (IPD), pneumococcal pneumonia and all-cause pneumonia during COVID-  
29 19 period with widely practiced of universal masking and social distancing to that of  
30 previous 5 years.

31 **Design:** Retrospective observational study on incidence of invasive pneumococcal  
32 diseases (IPD), pneumococcal pneumonia and all-cause pneumonia between January  
33 2015-December 2019 and March 2020-March 2021. January-February 2020 was  
34 excluded from analysis as it was treated as transitional period between normal time  
35 and pandemic, where universal masking was not completely executed.

36 **Setting:** Episode-based data by retrieval of hospitalization records from the Hospital  
37 Authority's territory-wide electronic medical record database in Hong Kong.

38 **Participants:** Hospitalized patients with invasive pneumococcal diseases (IPD)  
39 (n=742), pneumococcal pneumonia (n=2163) and all-cause pneumonia (including  
40 COVID-19 pneumonia, n=453,999) at age 18 or above. Control diagnoses were  
41 included to assess confounding from health-seeking behaviors.

42 **Primary and secondary outcome:** Primary outcome is the incidence of diseases  
43 between two periods. Secondary outcomes include disease severity surrogated by  
44 length of stay and mortality.

45 **Results:** Monthly average number of IPD, pneumococcal pneumonia and all-cause  
46 pneumonia hospitalization significantly decreased by 88.9% (95%CI 79.8%-98.0%,  
47  $p<0.0005$ ), 72.5% (95%CI 65.9%-79.1%,  $p<0.0005$ ) and 17.5% (95%CI 16.8%-18.2%,  
48  $p<0.0005$ ). Change in trend from January 2015-December 2019 to March 2020-March  
49 2021 was -70% (95%CI -87% to -35%,  $p=0.0025$ ), -43% (95%CI -59% to -19%,  
50  $p=0.0014$ ) and -11% (95%CI -13% to -10%,  $p<0.0005$ ). LOS for IPD and  
51 pneumococcal pneumonia episodes were insignificantly different in the two periods.  
52 No reductions in control diagnoses were observed.

53 **Conclusions:** Incidence of IPD, pneumococcal pneumonia, and all-cause pneumonia  
54 decreased during COVID-19 pandemic. This was observed with universal masking  
55 and social distancing. We proposed this is related to reduce transmission of respiratory  
56 viruses and bacteria.

1  
2  
3  
4  
57 **Strength and limitations of this study:**

- 58       • A territory-wide study with near 100% practice of universal masking  
59       • Other factors including temperature and air quality were also included in  
60       our analysis  
61       • Disease severity of IPD, pneumococcal pneumonia, and all-cause  
62       pneumonia were compared between the two periods  
63       • Data from private sector (<10%) were not included in our study  
64       • The causal relationship cannot be ascertained from this retrospective  
65       study  
66

67 **Funding:** This research received no specific grant from any funding agency in the  
68 public, commercial or not-for-profit sectors.  
69

70 **Competing interests:** There are no competing interests.  
71

72 **Data availability statements:** No additional data is available.  
73

74 **Authors' contributions:**

75 **King-Pui Florence Chan and Ting-Fung Ma** were involved in study concept and  
76 design; acquisition, analysis and interpretation of data; drafting the work and final  
77 approval of the manuscript. **Mary Sau-Man Ip** were involved in critical revision of  
78 manuscript for important intellectual content and final approval of the manuscript. **Pak-**  
79 **Leung Ho** was involved in study concept and design; analysis and interpretation of  
80 data; drafting of manuscript; critical revision of the manuscript for important intellectual  
81 content; study supervision; and approval of the final version of the manuscript.  
82

83 **Word count:** 3991

84 **Keywords:** pneumococcal, COVID-19, masking, regression analysis  
85

1  
2  
3 86 **Text**  
4

5  
6 87 **Introduction**  
7

8 88 Coronavirus disease 2019 (COVID-19) due to severe acute respiratory syndrome  
9 coronavirus 2 (SARS-CoV-2) infections was first reported in late 2019 [1]. It became  
10 89 a global pandemic and was declared as a public health emergency of international  
11 90 concern on 30 January 2020 by the World Health Organization [2]. As of 21st June  
12 91 2021, more than 178 million people were infected, causing more than 3.8 million  
13 92 deaths globally.  
14 93

15 94 Pneumococcal disease is caused by *Streptococcus pneumoniae* infection, with at  
16 95 least 100 known serotypes of pneumococci [3]. Pneumococcal disease can be  
17 96 roughly divided into non-invasive disease and invasive disease. Non-invasive  
18 97 disease includes sinusitis, acute otitis media and pneumonia. Invasive  
19 98 pneumococcal disease (IPD) is defined as isolation of *Streptococcus pneumoniae*  
20 99 from a normally sterile sites, including blood and cerebrospinal fluid [4]. IPD is a  
21 100 notifiable disease in Hong Kong since 9th January 2015. Pneumococcal infection is  
22 101 a major cause of morbidity and mortality worldwide [5], with 1.6 million estimated  
23 102 deaths annually in 2005 [6]. Incidence of IPD and mortality of pneumococcal  
24 103 pneumonia are higher in extremes of age [7-8].  
25 26 27 28 29

30 104 The first pneumococcal conjugated vaccine (PCV), Prevnar 7 (PCV7) was  
31 105 introduced to United States in 2000 and incorporated in Hong Kong Childhood  
32 106 Immunisation Programme for children under 2 years old since September 2009 [9-  
33 107 10]. In Hong Kong, PCV7 was replaced by the 10-valent and 13-valent  
34 108 pneumococcal conjugate vaccines (PCV10 and PCV13) in 2010 and 2011  
35 109 respectively [11-12]. PCV13 was effective in preventing vaccine-type pneumococcal  
36 110 pneumonia, bacteraemia and nonbacteraemic community-acquired pneumonia [13].  
37 111 Decline in incidences of all-cause pneumonia in children and elderly was reported  
38 112 after implementation of PCV in childhood vaccination program [14-15]. 23-valent  
39 113 polysaccharide vaccine (PPSV23) was effective in preventing pneumococcal  
40 114 pneumonia and reducing mortality from pneumococcal pneumonia in nursing home  
41 115 residents [16]. In our locality, elderly at age 65 years and above without high risk  
42 116 conditions, namely immunodeficiency or chronic cardiac, pulmonary, liver or renal  
43 117 disease, or diabetes mellitus were recommended to receive either a single dose of  
44 45 46 47 48 49 50 51 52 53 54 55 56 57 58 59 60

1  
2  
3 118 PCV13 or a single dose of PPSV23. Number of PPSV23 vaccine recipients at age  
4  
5 119 65 years or above increased from 35,000 in year 2015/2016 to 81,700 in 2019/2020,  
6  
7 120 reaching accumulative 45.5% of population in the age group vaccinated in  
8  
9 121 2019/2020 [17]. Pneumonia is a common disease causing hospitalization,  
10  
11 122 accounting for 2.9% of all inpatient discharges and death in Hong Kong [18]. It is the  
12  
13 123 second leading cause of death with age specific death rates increased markedly  
14  
15 124 after age 65 [17].  
16

125

17 126 Whether patients with COVID-19 are more susceptible to pneumococcal  
18  
19 127 superinfection is still under debate. Superinfection of pneumococcal in COVID-19  
20  
21 128 patients was reported [19]. Yet, low frequency of bacterial coinfection in patients with  
22  
23 129 early COVID-19 was also observed [20-21]. There is limited evidence on the  
24  
25 130 incidence and severity of IPD, pneumococcal pneumonia, and all-cause pneumonia  
26  
27 131 during COVID-19 pandemic, especially in area where universal masking and social  
28  
29 132 distancing were widely practiced. Since January 2020, universal masking in public  
30  
31 133 area was voluntarily performed by Hong Kong citizens against infection by COVID-  
32  
33 134 19. Cross sectional telephone self-reported surveys by the Hong Kong Public  
34  
35 135 Opinion Research Institute (HKPORI) showed percentage of wearing mask was  
36  
37 136 74.5% on 20th-23rd January 2020 (n=1,008), 97.6% on 5th-20th February  
38  
39 137 (n=10,405) and 98.9% on 4th-19th March (n=15,739) [22]. On 23rd July 2020,  
40  
41 138 masking was mandatory in public area upon the introduction of Prevention and  
42  
43 139 Control of Disease (Wearing of Mask) Regulation (Cap. 599I). Social distancing  
44  
45 140 measurements were voluntarily practiced by public and implemented by government  
46  
47 141 since 25th January 2020. These public health interventions were shown to  
48  
49 142 associated with relatively low rate of COVID-19 and early termination of influenza  
50  
51 143 season in Hong Kong [23]. Our previous studies suggested universal masking and  
52  
53 144 social distancing were associated with significant reduction in acute exacerbation of  
54  
55 145 chronic obstructive pulmonary disease and asthma in Hong Kong [24,25]. In the  
56  
57 146 current study, we hypothesized that the aforementioned COVID-19 related public  
58  
59 147 health interventions and reduction in respiratory virus activities would be associated  
60  
148 with reduction in hospitalization due to pneumococcal infections and pneumonia in  
149 general.

## 151 **Materials and Methods**

152 A retrospective study assessing the numbers of IPD, pneumococcal pneumonia, and  
153 all-cause pneumonia which required hospital hospitalization during the period of  
154 COVID-19 in Hong Kong, comparing with that in the preceding five years as  
155 baseline. The study period was 1st January 2015 to 31st March 2021 with exclusion  
156 of 1st January 2020 to 28th February 2020 from analysis, when universal masking  
157 was not yet completely executed.

### 159 **Data source**

160 Episode-based data was obtained by retrieval of hospitalization records from the  
161 Hospital Authority's territory-wide electronic medical record database, Clinical Data  
162 Analysis and Reporting System (CDARS), which provides 90% of in-patient hospital  
163 care service in Hong Kong [24,25].

164  
165 Diagnosis code of pneumococcal pneumonia (ICD-9 code 481) was searched on  
166 CDARS. IPD is a notifiable disease since January 2015 with monthly number notified  
167 cases and age obtained from the Department of Health, Hong Kong Special  
168 Administrative Region (HKSAR). Monthly number of influenza virus detection was  
169 collected from a territory-wide laboratory surveillance for both in-patients and out-  
170 patients in both public and private medical sectors from the Centre for Health  
171 Protection (CHP), HKSAR [17].

172  
173 All-cause pneumonia including the following ICD-9 codes for viral, bacterial,  
174 tuberculous, fungal and unspecified pneumonia, pneumonia due to inhalation of food  
175 or vomitus and lung abscess were obtained from CDARS (ICD-9 code 003.22,  
176 055.1, 0.1160-1.1166, 112.4, 115, 117.3, 480, 481, 482, 483.1, 483.8, 485, 486,  
177 487, 507.0, 513). Patient with COVID-19 associated pneumonia was included in the  
178 all-cause pneumonia dataset. The contribution of COVID-19 within all-cause  
179 pneumonia was queried using ICD codes for COVID-19 disease (ICD-9 code 079.89,  
180 480.8, 519.8). Demographics data (including sex, age), clinical data (including  
181 hospitalization date, length of stay, episode death, date of death) were collected. The  
182 results including admission number of various diseases were available in the CHP  
183 website and the Hospital Authority Statistics Report [17,26].

184

**Inclusion/ exclusion criteria**

186 Patients with 1) age 18 or above 2) hospitalization for the listed diseases  
187 (pneumococcal pneumonia, IPD and pneumonia) were included in the study.

188

189 Children at aged 0 to 17 years old were excluded in this study. Duplicated record of  
190 single patient with different diagnoses in same hospital admission were removed.

191

**Other diagnoses**

193 Number of hospitalization for other common medical and surgical conditions including  
194 acute kidney injury (ICD-9 code 580, 584), fracture hip (ICD-9 code 820) and peritonitis  
195 due to peritoneal dialysis (PD peritonitis) (ICD-9 code 996.68) were collected. These  
196 were included to evaluate the possibility of decrease in hospital attendance due to  
197 various reasons such as fear of COVID-19 infection in hospital. These diseases were  
198 selected as are non-communicable diseases and have minimal interactions with  
199 environmental factors including mean ambient temperature and air-pollution.

200

**Other variables**

202 Monthly mean ambient temperature was obtained from the Hong Kong Observatory  
203 [27]. Air quality was measured by air quality health index (AQHI), which is calculated  
204 based on the cumulative health risk attributable to a 3-hour moving average  
205 concentrations of ozone, nitrogen dioxide, sulphur dioxide and particulate matter [28].  
206 It was reported in scale of 1 to 10 and 10+ and grouped into five health risk categories,  
207 namely low [1-3], moderate [4-6], high [7], very high [8-10] and serious [10+] with  
208 different precautionary actions were advised. People with respiratory illness were  
209 advised to minimize their outdoor stay when AQHI high to serious. The AQHI was  
210 reported hourly in 13 stations located in different area of Hong Kong. The total number  
211 of hours with AQHI recorded as high to serious grades were expressed as percentage  
212 of total number of hours collected in a month.

213

**Statistical method**

215 Total number of hospitalizations due to IPD, pneumococcal pneumonia and all-cause  
216 pneumonia were collected and analysed. Each disease was further divided into three



1  
2  
3 217 different age groups, including 18 to 49 years, 50 to 64 years, and 65 years or above  
4  
5 218 for analysis.

6  
7 219

8 220 Analysis was done on the number of hospitalizations between January 2015 to  
9  
10 221 December 2019, the period prior COVID-19 (period 1) and March 2020 to March  
11  
12 222 2021 (period 3), while January to February 2020 (period 2) was treated as transition  
13  
14 223 period and excluded from the analysis. Wilcoxon rank sum test was first used to  
15  
16 224 analyse the statistical significance of number of hospitalizations between period 1  
17  
18 225 and period 3. Generalized linear models were then applied for statistical inference of  
19  
20 226 various types of responses. Log-linear model was used for studying the effect of  
21  
22 227 pandemic as intervention under segmented regression framework in term of the  
23  
24 228 change in trend (i.e. an increase or decrease in the level of the segment) between  
25  
26 229 period 1 (pre-intervention segment) and period 3 (post-intervention segment) on the  
27  
28 230 monthly hospitalization count. Regression coefficients of log-linear model can be  
29  
30 231 interpreted as the effect due to pandemic by log-linear model [29]. Temporal effect  
31  
32 232 was adjusted by covariates, including AQHI, temperature and effect of masking.

33  
34 233

35 234 Generalized linear model was used for comparing the mortality rate of individuals  
36  
37 235 between the two time periods [30]. Hospitalization length of stay (LOS) was  
38  
39 236 described in days using median and standard deviation. Statistical inference of the  
40  
41 237 LOS in hospitalization of individuals was done by Wilcoxon rank sum test with odds  
42  
43 238 ratio and relative risks and confidence intervals calculated [29].

44  
45 239

46 240 Monthly incidence rate for each disease was calculated using the total population  
47  
48 241 followed by age groups stratification (18 to 49 years, 50 to 64 years and  $\geq 65$  years)  
49  
50 242 and expressed as number per 100,000 person-year. Age-specific population data  
51  
52 243 was obtained from the Census and Statistics Department.

53  
54 244

### 55 245 ***Ethics Approval***

56 246 The study was approved by the Institutional Review Board of the University of Hong  
57  
58 247 Kong/ Hospital Authority Hong Kong West Cluster (Reference Number UW-21-325).

59  
60 248

### 61 249 ***Patient and public involvement***



1  
2  
3 250 Patients or the public were not involved in the design, or conduct, or reporting, or  
4  
5 251 dissemination plans of our research.  
6  
7  
8  
9  
10  
11  
12  
13  
14  
15  
16  
17  
18  
19  
20  
21  
22  
23  
24  
25  
26  
27  
28  
29  
30  
31  
32  
33  
34  
35  
36  
37  
38  
39  
40  
41  
42  
43  
44  
45  
46  
47  
48  
49  
50  
51  
52  
53  
54  
55  
56  
57  
58  
59  
60

For peer review only

## 253 **Results**

### 254 ***Invasive pneumococcal disease***

255 The total number of notified IPD episodes was 742 in the entire study, with 699  
256 reported in period 1 and 17 reported in period 3. Pneumococcal serotypes for 684 of  
257 the 699 episodes in period 1, and 13 of the 17 episodes in period 3 were  
258 successfully determined. The proportions attributed to PCV13 serotypes was 66.5%  
259 (465/699) and 29.4% (5/17) respectively for period 1 and period 3. Serotype 3 was  
260 the commonest serotype in both periods, accounting for 41.3% (289/699) and 17.6%  
261 (3/17) of total, respectively. From period 1 to period 3, the monthly number of IPD  
262 caused by PCV13 serotypes declined by 95.1% (95%CI 93.4%-96.4%) while those  
263 for non-PCV13 serotypes declined by 83.0% (95%CI 78.8%-86.5%), and those for  
264 PPSV23 serotypes declined by 94.1% (95% CI 92.3%-95.5%). The small difference  
265 between declines in PCV13 and PPSV23 serotypes was mainly attributed to  
266 serotype 6A which was included in PCV13 but not in PPSV23.

267

268 Monthly number of IPD peaked in January-February each year except in 2016, with  
269 the peak in April (Figure 1A and Figure S2). Monthly average number of notified IPD  
270 episodes was  $11.7 \pm 6.2$  in period 1, with significant decrease to  $1 \pm 4.3$  in period 3  
271 ( $p < 0.0005$ ). By log-linear model segmented regression, relative risk of IPD in period  
272 3 was 0.85 (95%CI 0.75-0.96,  $p = 0.0089$ ) (Table S1). Further analysis on the relative  
273 risk of different age groups showed significant decline in relative risk of IPD in aged  
274  $\geq 65$  years (0.78, 95%CI 0.61-0.99,  $p = 0.041$ ). Estimated change in trend in the mean  
275 number of cases from period 1 to period 3 was -70% (95%CI -87% to -35%,  
276  $p = 0.0025$ ) (Figure 1A, Table S1).

277

278 Incidence rate per 100,000 person-years was 2.2 in period 1 and 0.2 in period 3, with  
279 an interval reduction of 88.9% (95%CI 79.8%-98.0%,  $p < 0.0005$ ). Incidence rate ratio  
280 between period 1 and period 3 was 0.11 (95%CI 0.07-0.18,  $p < 0.0005$ ) (Table 1). IPD  
281 is most prevalent in age  $\geq 65$ . The magnitude of reduction in incidence rate was  
282 similar across different age groups, ranging from 81.3% to 93.5% ( $p < 0.0005$  for all  
283 age groups) (Table 1).

284

1  
2  
3 285 The overall median LOS for IPD was 12 (Interquartile range, IQR 16) days in period  
4 286 1 and 12 (IQR 11) days in period 3 (Table 2), with statistically insignificant difference  
5 287 (p=0.89). Statistically insignificant variations in LOS of different age groups were  
6 288 observed.  
7  
8  
9

10 289

### 11 290 ***Pneumococcal pneumonia***

12 291 In the entire study period, there were 2,163 episodes of hospitalization for  
13 292 pneumococcal pneumonia, with 1970 episodes in period 1 and 119 episodes in  
14 293 period 3 (Table 1). Monthly number of pneumococcal pneumonia was peaked in  
15 294 January-February each year except in 2016, with the peak in April (Figure 1B and  
16 295 Figure S2). The average monthly hospitalizations was  $32.8 \pm 9.9$  episodes in period 1,  
17 296 with significant drop to  $9.2 \pm 3.9$  episodes in period 3 ( $p < 0.0005$ ). By log-linear model  
18 297 segmented regression, relative risk of pneumococcal pneumonia was 0.90 (95%CI  
19 298 0.86-0.95,  $p < 0.005$ ) in period 3. Trend analysis revealed a change of -43% (95%CI -  
20 299 59% to -19%,  $p = 0.0014$ , Figure 1B, Table S1) from period 1 to period 3. Age groups  
21 300 analysis showed similar change in trend for all age groups, with statistically  
22 301 significance in aged  $\geq 65$  years (-41%, 95%CI -61% to -12%,  $p = 0.010$ ) from period 1  
23 302 to period 3 (Table S1, Figure S1).  
24  
25  
26  
27  
28  
29  
30  
31  
32  
33  
34  
35

36 304 Overall, the incidence rate of hospitalization for pneumococcal pneumonia  
37 305 decreased significantly by 72.5% (95%CI 65.9%-79.1%,  $p < 0.0005$ ), from 6.2 per  
38 306 100,000 person-years in period 1 to 1.7 per 100,000 person-years in period 3.  
39 307 Incidence rate ratio between period 1 and period 3 was 0.28 (95%CI 0.23-0.33,  
40 308  $p < 0.0005$ ) (Table 1). Incidence rate per 100,000 person year showed statistically  
41 309 significant reduction in all age groups, ranging from 73.0% to 82.5%.  
42  
43  
44  
45  
46  
47

48 311 The overall median LOS for pneumococcal pneumonia in period 1 and period 3 was  
49 312 9 (IQR 14) days and 12 (IQR 17) days in all age group ( $p = 0.051$ ) (Table 2). Age  
50 313 group stratification showed insignificant changes in length of stay in those aged 18-  
51 314 49 years ( $p = 0.8051$ ) and aged  $\geq 65$  years ( $p = 0.226$ ). Increase in length of stay from 9  
52 315 (IQR 15) days to 13 (IQR 20) days was observed in age group 50-64 years, and was  
53 316 statistically significant ( $p = 0.019$ ). Mortality rate for all ages was 13.1% (95% CI  
54 317 11.7%-14.8%) in period 1 and 22.7% (95%CI 15.5%-31.3%) in period 3 ( $p = 0.0187$ ).  
55  
56  
57  
58  
59  
60

1  
2  
3 318 Mortality rate was only statistically significant in aged 50-64 years ( $p=0.0007$ ) but not  
4  
5 319 in aged 18-49 years ( $p=0.9917$ ) and aged  $\geq 65$  years ( $p=0.246$ ) (Table 2).  
6  
7 320  
8  
9 321

### 10 322 **All-cause pneumonia**

11 323 In the entire study period, total hospitalization episodes for all-cause pneumonia was  
12 324 453,999, of which 372,660 episodes in period 1 and 67,474 episodes in period 3.

13  
14  
15 325 Monthly number of all-cause pneumonia peaked in January to March each year  
16  
17 326 (Figure 1C and Figure S2). Mean monthly number of hospitalizations for all-cause  
18  
19 327 pneumonia declined by 16.4% (95%CI 15.7%-17.1%,  $p<0.0005$ ) from  $6211\pm 845.0$   
20  
21 328 episodes in period 1 to  $5190.3\pm 593.8$  episodes in period 3 ( $p<0.0005$ ) (Figure 1C).  
22  
23 329 Estimated change in trend in the mean number of cases in period 3 was -11%  
24  
25 330 (95%CI -13% to -10%,  $p<0.0005$ ). By log-linear model segmented regression,  
26  
27 331 relative risk of all-cause pneumonia in period 3 compared with period 1 was 0.98  
28  
29 332 (95%CI 0.98-0.99,  $p<0.0005$ ) (Table S1).  
30

31 334 Overall, the incidence rate per 100,000 person-years was 1,169.7 in period 1, with  
32  
33 335 17.5% (95%CI 16.8%-18.2%,  $p<0.0005$ ) reduction in period 3 to 964.5 per 100,000  
34  
35 336 person-years in period 3. Incidence rate ratio between period 1 and period 3 was  
36  
37 337 0.83 (95%CI 0.82-0.83,  $p<0.0005$ ) (Table 1). The incidence rate decrease in period  
38  
39 338 3 compared to period 1 in all age groups.  
40

41 340 The overall median LOS for all-cause pneumonia episodes was 6 (IQR 9) days in  
42  
43 341 period 1 and 6 (IQR 10) days in period 3 ( $p<0.005$ ) (Table 2). Different age groups  
44  
45 342 showed decrease in LOS but were only statistically significant in age 18-49 years  
46  
47 343 and 50-64 years. The mortality rate increased from 20.5% (95% CI 20.4%-20.6%) in  
48  
49 344 period 1 to 24.2% (95%CI 24.9%-25.6%) in period 3 ( $p<0.005$ ) for all-cause  
50  
51 345 pneumonia. The increase in mortality rate was statistically significant in all age  
52  
53 346 groups (Table 2).  
54

55 348 For subgroup of aspiration pneumonia, total number of hospitalization in the entire  
56  
57 349 study period was 21,183, with 17990 episodes in period 1 and 2684 episodes in  
58  
59  
60

1  
2  
3 350 period 3. Mean monthly number of aspiration pneumonia was  $299.8 \pm 31.3$  in period 1  
4  
5 351 and  $206.5 \pm 30.5$  in period 3 ( $p < 0.0005$ ).  
6  
7 352  
8  
9 353

### 10 354 **COVID-19**

11  
12 355 In period 3, the total reported cases of COVID-19 infection at age 18 or above was  
13  
14 356 10,348 [15]. Among these patients, 331 were diagnosed with pneumonia. Majority of  
15  
16 357 them were in the age group 65 years old or above ( $n=175$ ). 58 of them were in age  
17  
18 358 group 18-49 while 98 patients in age group 50-64.  
19  
20 359

### 21 360 22 361 **Influenza**

23  
24 362 The total number of influenza A or B viruses detected from January 2015 to March  
25  
26 363 2021 in Hong Kong was 123,732. The monthly number of influenza detections  
27  
28 364 decreased drastically by 99.5% (95%CI 99.4%-99.5%,  $p < 0.0005$ ) from  $1,966 \pm 2179$  in  
29  
30 365 period 1 to  $10 \pm 18$  in period 3 (Figure 1D and Figure S2). The monthly average number  
31  
32 366 of respiratory specimens tested was  $4313 \pm 1172$  in period 1 and  $3203 \pm 1868$  in period  
33  
34 367 3.

35  
36 368 By log-linear model segmented regression, relative risk of influenza was 0.92 (95%CI  
37  
38 369 0.88-0.95,  $p < 0.0005$ ). Estimated change in trend in the mean number of detections in  
39  
40 370 period 3 was -99.0% (95%CI -99.3% to -98.7%,  $p < 0.0005$ ) of that in period 1 (Figure  
41  
42 371 1D)  
43  
44 372

45 373

### 46 374 **Other diagnosis: acute kidney injury, PD peritonitis and fracture hip**

47  
48 375 The monthly average number of hospitalization episodes for acute kidney injury in  
49  
50 376 period 1 and period 3 was  $807.8 \pm 87.5$  and  $911.7 \pm 62.6$ , respectively ( $p < 0.0005$ )  
51  
52 377 (Figure 2) The monthly average number of hospitalization episodes for PD peritonitis  
53  
54 378 was  $246.7 \pm 27.7$  in period 1 and  $255.9 \pm 31.9$  in period 3 ( $p = 0.23$ ). The monthly  
55  
56 379 average number of hospitalization episodes for fracture hip was  $432.9 \pm 53.1$  in period  
57  
58 380 1 and  $417.3 \pm 51.6$  in period 3 ( $p = 0.37$ )  
59  
60

## Discussion

Hong Kong is a city with population of 7.5 million where universal masking and social distancing were widely practiced during the COVID-19 pandemic period. This study showed a drastic decrease in numbers of hospitalization for IPD and pneumococcal pneumonia and a lesser but still very significant decrease in all cause pneumonia after anti-COVID-19 measures in March 2020 to March 2021.

During COVID-19 period, decrease in incidence of IPD were observed in Taiwan and Singapore [31-32]. The decrease in IPD in Hong Kong was greater magnitude compare to other countries [33]. Our study added new information on the incidence and severity of IPD, pneumococcal pneumonia and all-cause pneumonia in terms of age-stratification.

Introduction of the current pneumococcal conjugate vaccines has been highly successful in reducing the incidence of pneumococcal diseases worldwide [34,35]. Vaccine efficacy of PCV13 against vaccine type IPD in children aged  $\leq 5$  years was 86%-96% [36]. In adults aged  $\geq 65$  years, the vaccine efficacy against vaccine type IPD was reported as 75% and against vaccine type community-acquired pneumonia were reported as 45.6% and 72.8% respectively [13,37]. In contrast, PPV23 only has vaccine efficacy of 24% against vaccine type community acquired pneumonia in aged  $\geq 65$  years [38]. In Hong Kong, a marked reduction in vaccine type IPD was observed in children few years after implementation of PCV in 2009 [10,12]. However, the indirect effect on adult IPD was not evident. Annual number of adult IPD hospitalization remains static in period 1 (Figure 1A). Universal masking in Hong Kong was shown to decrease the incidence of SARS-CoV2 [39,40] and influenza [41] during the COVID-19 pandemic. Our study showed 88.9% reduction in incidence of adult IPD. The drastic decrease in incidence of IPD included both vaccine and non-vaccine types and was comparable and greater than the reported figure after introduction of pneumococcal vaccines [13,35]. IPD can lead to significant mortality and morbidity [42]. Our study showed decrease in incidence and trend of IPD and were statistically significant. The decrease in mortality of IPD during the COVID-19 pandemics was statistically insignificant, which can be contributed by the relative small sample size.

1  
2  
3 416

417 Incidence of all-cause pneumonia showed a much lower magnitude of decrease with  
418 the lesser decrease observed in those aged  $\geq 65$  years (supplementary file, Figure  
419 S1C). In our study, patients with diagnosis of pneumonia during the hospital stay  
420 were included. On review of data, majority of pneumonia patients in age group 65  
421 years or above had other comorbidities including dementia, diabetes mellitus and  
422 malignancy included in the same admission. The prevalence of chronic disease is  
423 higher in elderly. The population of Hong Kong has been seeing an aging trend and  
424 the population of 65 years old or above was 1,114,600 in 2015, and increased to  
425 1,371,800 in 2020. The incidence of chronic disease, for example, malignancy  
426 increased for 38.1% from 2008 to 2018 [17]. Patients with chronic diseases are at  
427 higher risk of acquiring infection including pneumonia. Moreover, chronic disease  
428 can be the cause leading to hospital admission with subsequent development of  
429 hospital acquired pneumonia.

430

431 Pneumococcal pneumonia and IPD are debilitating diseases which have been  
432 shown to require long length of hospital stay and high hospital cost [43-44]. The LOS  
433 in pneumococcal pneumonia was slightly increased from 17.7 to 19.5 days but was  
434 statistically insignificant. Looking into different age groups, only patients with age 50  
435 to 64 years old showed statistically significant increase in LOS, while patients in age  
436 group 18 to 49 years old and 65 years old or above showed slight decrease. The  
437 severity of pneumococcal pneumonia can be comparable in the two periods.

438

439 Health seeking behaviour was also evaluated in our study. Admissions of non-  
440 communicable diseases revealed either statistically insignificant decrease in hospital  
441 attendance or statistically significant increase in hospital attendance. The incidence  
442 of AKI increased in our study from  $807.8 \pm 87.5$  in period 1 to  $911.7 \pm 62.6$  in period 3.  
443 Drug induced AKI is an important cause in Asia [45]. Possible explanation can be  
444 due to the health seeking behaviour of patients with intake of over-the counter  
445 medication for mild diseases prior seeking help from the hospital. Yet the exact  
446 cause of increase in incidence of AKI should be investigated. Our study covered  
447 more than one year time for COVID-19 pandemics with a relatively stable number of  
448 hospital attendance. Hence, the decrease in incidence of pneumococcal pneumonia,



1  
2  
3 449 IPD and all-cause pneumonia cannot be explained by health seeking behaviour  
4  
5 450 alone.

6 451  
7  
8 452 Collateral damages were observed during the COVID-19 pandemic [46-47], some of  
9  
10 453 which were contributed by the decrease in general medical services to concentrate  
11  
12 454 healthcare resources for the care of SARS-CoV-2 patients and the prevention of  
13  
14 455 possible viral spread. However, due to the relatively small number of COVID-19  
15  
16 456 cases in Hong Kong, provision of acute medical services was minimally disrupted. In  
17  
18 457 our study, the data on admissions for fractures, acute kidney injury and PD peritonitis  
19  
20 458 showed no decrease during the Covid pandemic. Hence the observed decrease in  
21  
22 459 hospital admissions for pneumococcal pneumonia, IPD and all-cause pneumonia  
23  
24 460 should not be artefactual. Masking can be an effective yet low-cost preventive  
25  
26 461 measurement for citizens at high risk of pneumococcal infections.  
27  
28 462

29 463

### 29 464 **Limitations**

30 465 This study is a retrospective observational study and the direct effect of universal  
31  
32 466 masking on pneumococcal pneumonia, IPD and all-cause pneumonia cannot be  
33  
34 467 ascertained. However, our study covered a period of more than one year when  
35  
36 468 universal masking was practiced and a consistent observation of decrease in  
37  
38 469 hospitalization for these diseases were seen. Other factors, namely ambient  
39  
40 470 temperature and AQHI, that might have possible effect on the hospitalization  
41  
42 471 numbers were also included in our analysis. However, the individual effects of  
43  
44 472 universal masking, social distancing (e.g. closure of schools, bars and pubs) and  
45  
46 473 other strategies cannot be evaluated separately. It is modelled by the effect of  
47  
48 474 pandemic as a whole in our study.

49 475

50 476 Our study focused on hospital hospitalization numbers to Hospital Authority. For IPD,  
51  
52 477 the incidence was obtained from Central of Health Protection, HKSAR, which  
53  
54 478 included data from both public and private hospitals data. The LOS and mortality  
55  
56 479 data of IPD were retrieved from the database in Hospital Authority. Admissions to  
57  
58 480 private hospital or those received out-patient treatment for pneumococcal pneumonia  
59  
60 481 and all-cause pneumonia were not included in our study. However, Hospital  
482 Authority is the largest healthcare provider in Hong Kong which provides 90% of in-

1  
2  
3 483 patient services in Hong Kong [26]. Data from Hospital Authority is representable for  
4 the general epidemiology of Hong Kong.  
5 484  
6  
7 485

8 486 **Conclusions**

9  
10 487 The incidence of pneumococcal pneumonia, IPD and all-cause pneumonia  
11 decreased during COVID-19 pandemics compare to the data in previous five years.  
12 488  
13 489 This was observed with widely practice of universal masking and social distancing.  
14  
15 490 We propose the decrease is attributed to universal masking and social distancing  
16  
17 491 which reduced the transmission of bacteria or virus and related bacterial  
18  
19 492 superinfection.  
20  
21  
22  
23  
24  
25  
26  
27  
28  
29  
30  
31  
32  
33  
34  
35  
36  
37  
38  
39  
40  
41  
42  
43  
44  
45  
46  
47  
48  
49  
50  
51  
52  
53  
54  
55  
56  
57  
58  
59  
60

1  
2  
3 494 **Figure caption**  
4  
5

6 495 **Figure 1.** Trend analysis of monthly numbers of invasive pneumococcal disease  
7 496 (IPD), pneumococcal pneumonia, all-cause pneumonia, and influenza in Hong Kong,  
8 497 January 2015 to March 2021. Numbers of IPD were those obtained through  
9 498 mandatory notification. Numbers of pneumococcal pneumonia and all-cause  
10 499 pneumonia were territory-wide hospitalizations by discharge diagnoses. Numbers of  
11 500 influenza viruses were those detected in respiratory specimens in a territory-wide  
12 501 laboratory surveillance. The two vertical lines delineated the time intervals from  
13 502 January 2015 to December 2019 (period 1, prior to COVID-19), January to February  
14 503 2020 (period 2, excluded from analysis) and March 2020 to March 2021 (period 3,  
15 504 COVID-19 pandemic).  
16  
17  
18  
19  
20  
21  
22

23 505

24 506 **Figure 2.** Admission numbers of fracture hip, acute kidney injury and PD peritonitis.  
25  
26  
27  
28  
29  
30  
31  
32  
33  
34  
35  
36  
37  
38  
39  
40  
41  
42  
43  
44  
45  
46  
47  
48  
49  
50  
51  
52  
53  
54  
55  
56  
57  
58  
59  
60

508 **References**

- 509 1. Wu Z, McGoogan JM. Characteristics of and Important Lessons from the  
510 Coronavirus Disease 2019 (COVID-19) Outbreak in China: Summary of a Report  
511 of 72314 Cases From the Chinese Center for Disease Control and Prevention.  
512 JAMA. 2020.
- 513 2. World Health Organization statement on the second meeting of the International  
514 Health Regulations (2005) Emergency Committee regarding the outbreak of  
515 novel coronavirus (2019-nCoV) [https://www.who.int/news/item/30-01-2020-](https://www.who.int/news/item/30-01-2020-statement-on-the-second-meeting-of-the-international-health-regulations-(2005)-emergency-committee-regarding-the-outbreak-of-novel-coronavirus-(2019-ncov))  
516 [statement-on-the-second-meeting-of-the-international-health-regulations-\(2005\)-](https://www.who.int/news/item/30-01-2020-statement-on-the-second-meeting-of-the-international-health-regulations-(2005)-emergency-committee-regarding-the-outbreak-of-novel-coronavirus-(2019-ncov))  
517 [emergency-committee-regarding-the-outbreak-of-novel-coronavirus-\(2019-ncov\)](https://www.who.int/news/item/30-01-2020-statement-on-the-second-meeting-of-the-international-health-regulations-(2005)-emergency-committee-regarding-the-outbreak-of-novel-coronavirus-(2019-ncov))
- 518 3. Ganaie F, Saad JS, McGee L, van Tonder AJ, Bentley SD, Lo SW, et al. A New  
519 Pneumococcal Capsule Type, 10D, is the 100th Serotype and Has a Large *cps*  
520 Fragment from an Oral Streptococcus. *mBio*. 2020 May 19;11(3):e00937-20.
- 521 4. Ludwig E, Bonanni P, Rohde G, Sayiner A, Torres A. The remaining challenges  
522 of pneumococcal disease in adults. *Eur Respir Rev*. 2012 Mar 1;21(123):57-65.
- 523 5. Drijkoningen JJ, Rohde GG. Pneumococcal infection in adults: burden of disease.  
524 *Clin Microbiol Infect*. 2014 May;20 Suppl 5:45-51.
- 525 6. World Health Organization Pneumococcal Disease. Available from:  
526 <https://www.who.int/ith/diseases/pneumococcal/en/>
- 527 7. Burgos J, Luján M, Larrosa MN, Pedro-Botet ML, Fontanals D, Quesada MD, et  
528 al. The problem of early mortality in pneumococcal pneumonia: a study of risk  
529 factors. *Eur Respir J*. 2015 Aug;46(2):561-4.
- 530 8. Chi RC, Jackson LA, Neuzil KM. Characteristics and outcomes of older adults  
531 with community-acquired pneumococcal bacteremia. *J Am Geriatr Soc*. 2006  
532 Jan;54(1):115-20.
- 533 9. Ho PL, Chiu SS, Chow FK, Mak GC, Lau YL. Pediatric hospitalization for  
534 pneumococcal diseases preventable by 7-valent pneumococcal conjugate  
535 vaccine in Hong Kong. *Vaccine*. 2007 Sep 28;25(39-40):6837-41.
- 536 10. Ho PL, Chiu SS, Ang I, Lau YL. Serotypes and antimicrobial susceptibilities of  
537 invasive *Streptococcus pneumoniae* before and after introduction of 7-valent  
538 pneumococcal conjugate vaccine, Hong Kong, 1995-2009. *Vaccine*. 2011 Apr  
539 12;29(17):3270-5.

- 1  
2  
3 540 11. Deloria, K.M., Bennett, J.C., Garcia, Q.M., Kagucia, E.W., Peterson, M.E., Feikin,  
4 541 D.R., et al. Global Landscape Review of Serotype-Specific Invasive  
5 542 Pneumococcal Disease Surveillance among Countries Using PCV10/13: The  
6 543 Pneumococcal Serotype Replacement and Distribution Estimation  
7 544 (PSERENADE) Project. *Microorganisms*. 9.  
8  
9  
10 544  
11  
12 545 12. Ho, P.L., Law, P.Y., and Chiu, S.S., 2019. Increase in incidence of invasive  
13 546 pneumococcal disease caused by serotype 3 in children eight years after the  
14 547 introduction of the pneumococcal conjugate vaccine in Hong Kong. *Hum. Vaccin.*  
15 548 *Immunother.* 15: 455-458.  
16  
17  
18 549 13. Bonten MJ, Huijts SM, Bolkenbaas M, Webber C, Patterson S, Gault S, et al.  
19 550 Polysaccharide conjugate vaccine against pneumococcal pneumonia in adults. *N*  
20 551 *Engl J Med.* 2015 Mar 19;372(12):1114-25.  
21  
22  
23 552 14. López EL, Glatstein E, Ezcurra GC, Iacono M, Teplitz E, Garneró AV, et al. Rapid  
24 553 Decrease in Rates of Hospitalization Resulting From Invasive Pneumococcal  
25 554 Disease and Community-Acquired Pneumonia in Children Aged <60 Months  
26 555 After 13-Valent Pneumococcal Conjugate Vaccine Introduction in Argentina. *J*  
27 556 *Pediatric Infect Dis Soc.* 2018 Feb 19;7(1):30-35.  
28  
29  
30 557 15. Nieto Guevara J, Daza C, Smith R. Decrease in Hospitalizations for Pneumonia  
31 558 in Children under Five Years of Age in an Indian Reservation in Panama after the  
32 559 Introduction of the Heptavalent Pneumococcal Conjugate Vaccine (PCV7). *Int J*  
33 560 *Pediatr.* 2013;2013:514578.  
34  
35  
36 561 16. Maruyama T, Taguchi O, Niederman MS, Morser J, Kobayashi H, Kobayashi T,  
37 562 et al. Efficacy of 23-valent pneumococcal vaccine in preventing pneumonia and  
38 563 improving survival in nursing home residents: double blind, randomised and  
39 564 placebo controlled trial. *BMJ.* 2010 Mar 8;340:c1004.  
40  
41  
42 565 17. Centre for Health Protection, Department of Health, Hong Kong Special  
43 566 Administrative Region. <https://www.chp.gov.hk/>  
44 567  
45 568 18. Department of Health Public Health Information System (PHIS)  
46 569 [https://www.healthyhk.gov.hk/phishweb/en/chart\\_detail/26/](https://www.healthyhk.gov.hk/phishweb/en/chart_detail/26/)  
47 570  
48 571 19. Cucchiari D, Pericàs JM, Riera J, Gumucio R, Md EC, Nicolás D; Hospital Clínic  
49 572 4H Team. Pneumococcal superinfection in COVID-19 patients: A series of 5  
50 573 cases. *Med Clin (Barc).* 2020 Dec 11;155(11):502-505.  
51  
52  
53 574 20. Karami Z, Knoop BT, Dofferhoff ASM, Blaauw MJT, Janssen NA, van Apeldoorn  
54 575 M, et al. Few bacterial co-infections but frequent empiric antibiotic use in the early

- 1  
2  
3 574 phase of hospitalized patients with COVID-19: results from a multicentre  
4 retrospective cohort study in The Netherlands. *Infect Dis (Lond)*. 2021  
5 575 Feb;53(2):102-110.  
6 576  
7  
8 577 21. Hughes S, Troise O, Donaldson H, Mughal N, Moore LSP. Bacterial and fungal  
9 coinfection among hospitalized patients with COVID-19: a retrospective cohort  
10 578 study in a UK secondary-care setting. *Clin Microbiol Infect*. 2020  
11 579 Oct;26(10):1395-1399.  
12 580  
13 581 22. Community Health Module Research Reports, Hong Kong Public Opinion  
14 582 Research Institute. Available from: <https://www.pori.hk/research-reports>  
15 583  
16 583 23. Chan KH, Lee PW, Chan CY, Lam KBH, Ho PL. Monitoring respiratory infections  
17 584 in covid-19 epidemics. *BMJ*. 2020;369:m1628.  
18 585  
19 585 24. Chan KPF, Ma TF, Kwok WC, Leung JKC, Chiang KY, Ho JCM, et al. Significant  
20 586 reduction in hospital admissions for acute exacerbation of chronic obstructive  
21 587 pulmonary disease in Hong Kong during coronavirus disease 2019 pandemic.  
22 588 *Respir Med*. 2020 Sep;171:106085.  
23 589  
24 589 25. Chan KPF, Kwok WC, Ma TF, Hui CH, Tam TC, Wang JK, et al. Territory-wide  
25 590 Study on Hospital Admissions for Asthma exacerbation in COVID-19 Pandemic.  
26 591 *Ann Am Thorac Soc*. 2021 Feb 26.  
27 592  
28 592 26. Hospital Authority Statistical Report. Available from:  
29 593 <https://www3.ha.org.hk/data/HASStatistics/DownloadReport/2>  
30 594  
31 594 27. Hong Kong Observatory. <https://www.hko.gov.hk/en/wxinfo/pastwx/mws/mws.htm>  
32 595  
33 595 28. Air Quality Health Index monthly summary.  
34 596 <https://www.aqhi.gov.hk/en/aqhi/statistics-of-aqhi/aqhi-monthly-summary.html>  
35 597  
36 597 29. Wagner AK, Soumerai SB, Zhang F, Ross-Degnan D. Segmented regression  
37 598 analysis of interrupted time series studies in medication use research. *J Clin Pharm*  
38 599 *Ther*. 2002 Aug;27(4):299-309.  
39 600  
40 600 30. A. Agresti (2012). *Categorical Data Analysis*, 3rd Edition. Wiley  
41 601  
42 601 31. Lim RH, Chow A, Ho HJ. Decline in pneumococcal disease incidence in the time  
43 602 of COVID-19 in Singapore. *J Infect*. 2020;81(6):e19-e21.  
44 603  
45 603 32. Juan HC, Chao CM, Lai CC, Tang HJ. Decline in invasive pneumococcal disease  
46 604 during COVID-19 pandemic in Taiwan. *J Infect*. 2021 Feb;82(2):282-327.  
47 605  
48 605 33. Teng JLL, Fok KMN, Lin KPK, Chan E, Ma Y, Lau SKP, Woo PCY. Substantial  
49 606 decline in invasive pneumococcal disease (IPD) during COVID-19 pandemic in  
50 607 Hong Kong. *Clin Infect Dis*. 2021 Apr 27:ciab382.

- 1  
2  
3 608 34. Bennett JC, Hetrich MK, Garcia Quesada M, Sinkevitch JN, Deloria Knoll M,  
4 609 Feikin DR, et al. Changes in Invasive Pneumococcal Disease Caused by  
5 610 *Streptococcus pneumoniae* Serotype 1 Following Introduction of PCV10 and  
6 611 PCV13: Findings from the PSERENADE Project. *Microorganisms*. 2021 Mar  
7 612 27;9(4):696.  
8  
9  
10  
11  
12 613 35. Waight PA, Andrews NJ, Ladhani SN, Sheppard CL, Slack MP, Miller E. Effect of  
13 614 the 13-valent pneumococcal conjugate vaccine on invasive pneumococcal  
14 615 disease in England and Wales 4 years after its introduction: an observational  
15 616 cohort study. *Lancet Infect Dis*. 2015 May;15(5):535-43.  
16  
17  
18 617 36. Berman-Rosa M, O'Donnell S, Barker M, Quach C. Efficacy and Effectiveness of  
19 618 the PCV-10 and PCV-13 Vaccines Against Invasive Pneumococcal Disease.  
20 619 *Pediatrics*. 2020 Apr;145(4):e20190377.  
21  
22  
23  
24 620 37. McLaughlin JM, Jiang Q, Isturiz RE, Sings HL, Swerdlow DL, Gessner BD et al.  
25 621 Effectiveness of 13-Valent Pneumococcal Conjugate Vaccine Against  
26 622 Hospitalization for Community-Acquired Pneumonia in Older US Adults: A Test-  
27 623 Negative Design. *Clin Infect Dis*. 2018 Oct 30;67(10):1498-1506.  
28  
29  
30  
31 624 38. Lawrence H, Pick H, Baskaran V, Daniel P, Rodrigo C, Ashton D et al.  
32 625 Effectiveness of the 23-valent pneumococcal polysaccharide vaccine against  
33 626 vaccine serotype pneumococcal pneumonia in adults: A case-control test-  
34 627 negative design study. *PLoS Med*. 2020 Oct 23;17(10):e1003326.  
35  
36  
37  
38 628 39. Cheng VC, Wong SC, Chuang VW, So SY, Chen JH, Sridhar S et al. The role of  
39 629 community-wide wearing of face mask for control of coronavirus disease 2019  
40 630 (COVID-19) epidemic due to SARS-CoV-2. *J Infect*. 2020 Jul;81(1):107-114.  
41  
42  
43 631 40. Chan JF, Yuan S, Zhang AJ, Poon VK, Chan CC, Lee AC et al. Surgical Mask  
44 632 Partition Reduces the Risk of Noncontact Transmission in a Golden Syrian  
45 633 Hamster Model for Coronavirus Disease 2019 (COVID-19). *Clin Infect Dis*. 2020  
46 634 Nov 19;71(16):2139-2149.  
47  
48  
49  
50 635 41. Wong SC, Lam GK, AuYeung CH, Chan VW, Wong NL, So SY et al. Absence of  
51 636 nosocomial influenza and respiratory syncytial virus infection in the coronavirus  
52 637 disease 2019 (COVID-19) era: Implication of universal masking in hospitals.  
53 638 *Infect Control Hosp Epidemiol*. 2021 Feb;42(2):218-221.  
54  
55  
56  
57 639 42. Chan T, Tay MZ, Kyaw WM, Chow A, Ho HJ. Epidemiology, vaccine  
58 640 effectiveness, and risk factors for mortality for pneumococcal disease among  
59  
60



- 1  
2  
3 641 hospitalised adults in Singapore: a case-control study. *BMC Infect Dis.* 2020 Jun  
4 642 17;20(1):423.  
5  
6 643 43. Darbà J, Marsà A. Hospital incidence, in-hospital mortality and medical costs of  
7 644 pneumococcal disease in Spain (2008-2017): a retrospective multicentre study.  
8 645 *Curr Med Res Opin.* 2021 Mar;37(3):523-530.  
9  
10 646 44. Brotons P, Gelabert G, Launes C, Sicuri E, Pallares R, Muñoz-Almagro C. Cost  
11 647 of hospitalizing children with invasive pneumococcal pneumonia. *Vaccine.* 2013  
12 648 Feb 4;31(7):1117-22.  
13  
14 649 45. Yang L. Acute Kidney Injury in Asia. *Kidney Dis (Basel).* 2016;2(3):95-102.  
15  
16 650 46. Bersano A, Kraemer M, Touzé E, Weber R, Alamowitch S, Sibon I et al. Stroke  
17 651 care during the COVID-19 pandemic: experience from three large European  
18 652 countries. *Eur J Neurol.* 2020 Sep;27(9):1794-1800.  
19  
20 653 47. Del Vecchio Blanco G, Calabrese E, Biancone L, Monteleone G, Paoluzi OA. The  
21 654 impact of COVID-19 pandemic in the colorectal cancer prevention. *Int J*  
22 655 *Colorectal Dis.* 2020 Oct;35(10):1951-1954.  
23  
24  
25  
26  
27  
28  
29  
30  
31  
32  
33  
34  
35  
36  
37  
38  
39  
40  
41  
42  
43  
44  
45  
46  
47  
48  
49  
50  
51  
52  
53  
54  
55  
56  
57  
58  
59  
60

**Table 1.** Incidence and number per 100,000 person year of pneumococcal pneumonia, invasive pneumococcal disease (IPD) and pneumonia

| Disease <sup>a</sup>     | All ages        |                                         | 18-49 years     |                                         | 50-64 years     |                                         | ≥65 years    |                                         |
|--------------------------|-----------------|-----------------------------------------|-----------------|-----------------------------------------|-----------------|-----------------------------------------|--------------|-----------------------------------------|
|                          | No. of episodes | Incidence rate per 100,000 person-years | No. of episodes | Incidence rate per 100,000 person-years | No. of episodes | Incidence rate per 100,000 person-years | No. of cases | Incidence rate per 100,000 person-years |
| IPD                      |                 |                                         |                 |                                         |                 |                                         |              |                                         |
| Period 1                 | 699             | 2.2                                     | 125             | 0.7                                     | 195             | 2.2                                     | 379          | 6.2                                     |
| Period 2                 | 26              | 2.4                                     | 5               | 0.9                                     | 6               | 2.0                                     | 15           | 6.6                                     |
| Period 3                 | 17              | 0.2                                     | 3               | 0.08                                    | 8               | 0.4                                     | 6            | 0.4                                     |
| % reduction <sup>b</sup> |                 | 88.9% (79.8%-98.0%) <sup>***</sup>      |                 | 88.6% (66.8%-110.4%) <sup>***</sup>     |                 | 81.3% (62.1%-100.4%) <sup>***</sup>     |              | 93.5% (82.2%-104.8%) <sup>***</sup>     |
| IRR <sup>c</sup>         |                 | 0.11(0.07-0.18) <sup>***</sup>          |                 | 0.11(0.04-0.36) <sup>***</sup>          |                 | 0.19(0.09-0.38) <sup>***</sup>          |              | 0.07(0.03-0.15) <sup>***</sup>          |
| Pneumococcal pneumonia   |                 |                                         |                 |                                         |                 |                                         |              |                                         |
| Period 1                 | 1,970           | 6.2                                     | 217             | 1.3                                     | 435             | 4.9                                     | 1,318        | 21.7                                    |
| Period 2                 | 74              | 6.9                                     | 11              | 2.0                                     | 14              | 4.7                                     | 49           | 32.4                                    |
| Period 3                 | 119             | 1.7                                     | 8               | 0.2                                     | 24              | 1.2                                     | 87           | 5.9                                     |
| % reduction              |                 | 72.5% (65.9%-79.1%) <sup>***</sup>      |                 | 82.5% (64.5%-100.5%) <sup>***</sup>     |                 | 74.8% (61.0%-88.6%) <sup>***</sup>      |              | 73.0% (65.2%-80.8%) <sup>***</sup>      |
| IRR <sup>c</sup>         |                 | 0.28(0.23-0.33) <sup>***</sup>          |                 | 0.18(0.09-0.35) <sup>***</sup>          |                 | 0.25(0.17-0.38) <sup>***</sup>          |              | 0.27(0.22-0.34) <sup>***</sup>          |
| All-cause pneumonia      |                 |                                         |                 |                                         |                 |                                         |              |                                         |
| Period 1                 | 372,660         | 1169.7                                  | 19,502          | 115.3                                   | 38,360          | 432.4                                   | 314,798      | 5177.1                                  |
| Period 2                 | 13,865          | 1288.2                                  | 843             | 153.6                                   | 1,448           | 484.6                                   | 11,574       | 5062.3                                  |
| Period 3                 | 67,474          | 964.5                                   | 2,473           | 69.3                                    | 6,181           | 318.3                                   | 58,820       | 3958.0                                  |
| % reduction              |                 | 17.5% (16.8%-18.2%) <sup>***</sup>      |                 | 39.9% (37.1%-42.7%) <sup>***</sup>      |                 | 26.4% (24.3%-28.5%) <sup>***</sup>      |              | 23.5% (22.8%-24.3%) <sup>***</sup>      |
| IRR <sup>c</sup>         |                 | 0.83(0.82-0.83) <sup>***</sup>          |                 | 0.60(0.58-0.63) <sup>***</sup>          |                 | 0.74(0.72-0.76) <sup>***</sup>          |              | 0.77(0.76-0.77) <sup>***</sup>          |

<sup>a</sup> Period 1, January 2015 to December 2019 (before covid-19); period 2, January 2020 to February 2020 (transition period); period 3 March 2020 to March 2021 (post-COVID-19).

<sup>b</sup> Percentage reduction in period 3 relative to period 1 as the baseline

<sup>c</sup> Incidence ratio between period 1 and period 3

\*p < 0.05 to 0.01, \*\*p < 0.01 to 0.005, \*\*\*p < 0.005

**Table 2.** Median length of stay and mortality rate of pneumococcal pneumonia, invasive pneumococcal disease (IPD) and pneumonia in the periods

|                               | Median length of stay; days (IQR)# |             |             |           | Mortality rate; % (95%CI) |                |                     |                     |
|-------------------------------|------------------------------------|-------------|-------------|-----------|---------------------------|----------------|---------------------|---------------------|
|                               | All ages                           | 18-49 years | 50-64 years | ≥65 years | All ages                  | 18-49 years    | 50-64 years         | ≥65 years           |
| <b>IPD</b>                    |                                    |             |             |           |                           |                |                     |                     |
| Period 1                      | 12 (16)                            | 13 (19)     | 13 (17)     | 12 (13)   | 12.1 (8.8-16.1)           | 9.1 (3.4-18.7) | 8.4 (3.7-15.9)      | 15.3 (10.3-21.4)    |
| Period 3                      | 12 (11)                            | 4 (3)       | 16 (19)     | 12 (6)    | 6.3 (1.6-30.2)            | 0.0            | 0.0                 | 14.3 (3.6-57.9)     |
| <b>Pneumococcal Pneumonia</b> |                                    |             |             |           |                           |                |                     |                     |
| Period 1                      | 9 (14)                             | 7 (14)      | 9 (15)*     | 10 (14)   | 13.1 (11.7-14.8)*         | 4.2 (1.9-7.7)  | 7.5 (5.3-10.5)**    | 16.3 (13.6-18.7)    |
| Period 3                      | 12 (17)                            | 7 (13)      | 13 (20)*    | 12 (16)   | 22.7 (15.5-31.3)*         | 0.0            | 29.2 (12.6-51.1)**  | 23.0 (14.6-33.2)    |
| <b>All-cause pneumonia</b>    |                                    |             |             |           |                           |                |                     |                     |
| Period 1                      | 6 (9)***                           | 4 (6)***    | 6 (9)**     | 6 (10)    | 20.5 (20.4-20.6)***       | 5.3 (4.9-5.6)* | 13.0 (11.4-12.0)*** | 22.4 (22.2-22.4)*** |
| Period 3                      | 6 (10)***                          | 4 (8)***    | 6 (10)**    | 6 (10)    | 24.2 (24.9-25.6)***       | 6.8 (5.9-7.9)* | 16.1 (5.2-17.0)***  | 27.0 (26.6-27.3)*** |

\*p &lt;0.05 to 0.01, \*\*p &lt;0.01 to 0.005, \*\*\*p&lt;0.005

# IQR= interquartile range

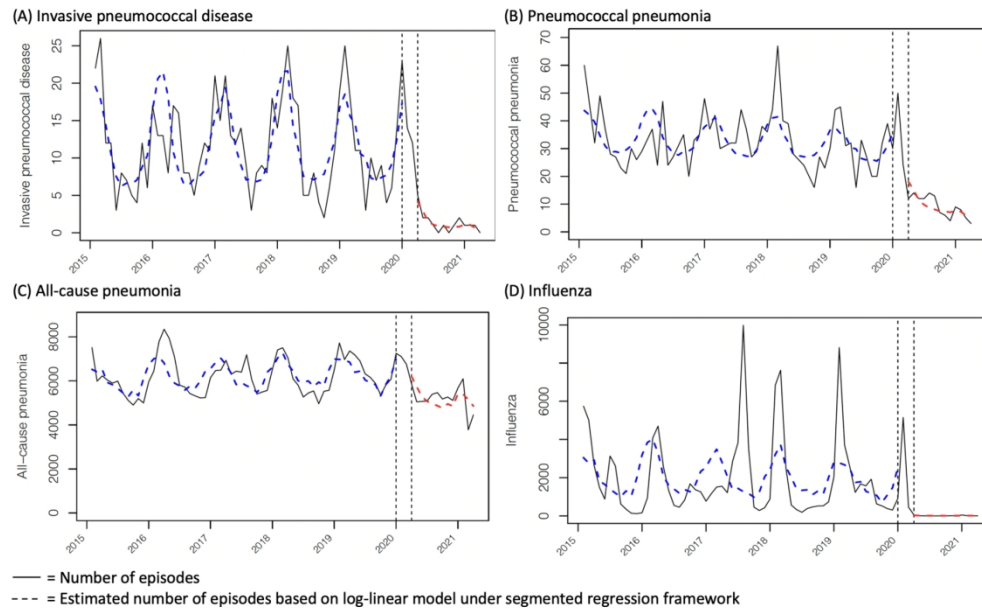

Figure 1. Trend analysis of monthly numbers of invasive pneumococcal disease (IPD), pneumococcal pneumonia, all-cause pneumonia, and influenza in Hong Kong, January 2015 to March 2021. Numbers of IPD were those obtained through mandatory notification. Numbers of pneumococcal pneumonia and all-cause pneumonia were territory-wide hospitalizations by discharge diagnoses. Numbers of influenza viruses were those detected in respiratory specimens in a territory-wide laboratory surveillance. The two vertical lines delineated the time intervals from January 2015 to December 2019 (period 1, prior to COVID-19), January to February 2020 (period 2, excluded from analysis) and March 2020 to March 2021 (period 3, COVID-19 pandemic).

352x218mm (144 x 144 DPI)



Figure 2. Admission numbers of fracture hip, acute kidney injury and PD peritonitis.

419x237mm (144 x 144 DPI)

## Supplementary file.

**Figure S1.** Trend analysis of monthly number of (A) age-stratified hospitalizations for invasive pneumococcal disease, (B) age-stratified hospitalizations for pneumococcal pneumonia, (C) age-stratified hospitalizations for and (D) monthly percentage of air quality health index (AQHI) high to serious and (E) monthly average ambient temperature.

### (A) Invasive pneumococcal disease



### (B) Pneumococcal pneumonia



### (C) All cause pneumonia

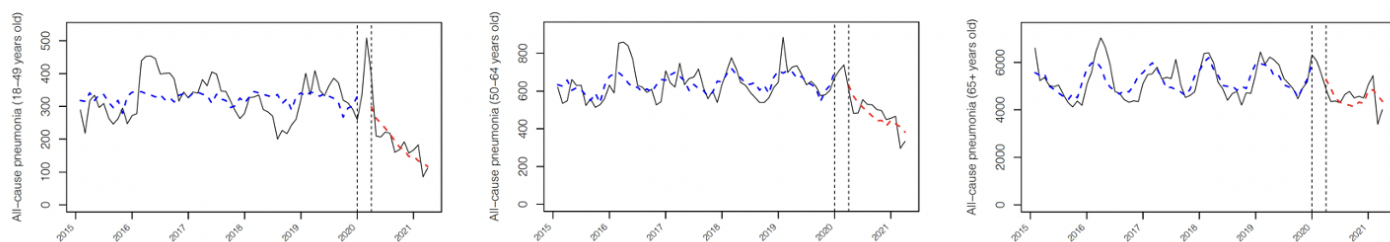

### (D) Monthly % of AQHI high to serious

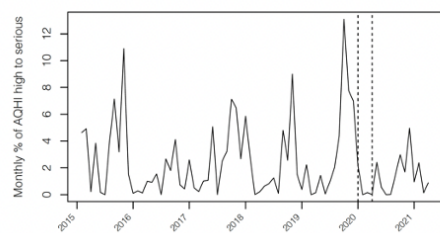

### (E) Monthly average temperature

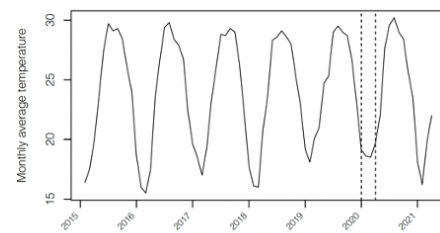

**Figure S2.** Monthly incidence of (A) Invasive pneumococcal disease (IPD), (B) Pneumococcal pneumonia, (C) All-cause pneumonia and (D) Influenza in January 2015 to March 2021.

(A) Invasive pneumococcal disease

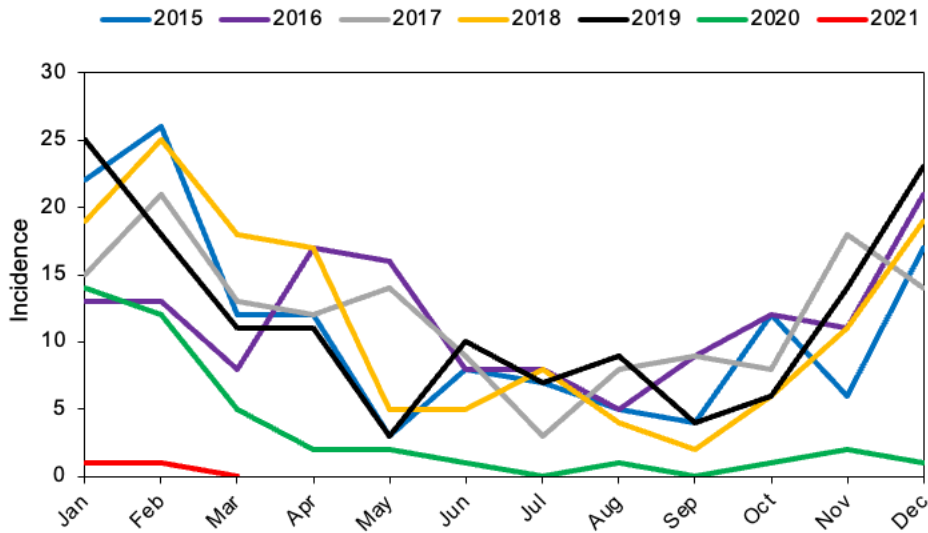

(B) Pneumococcal pneumonia

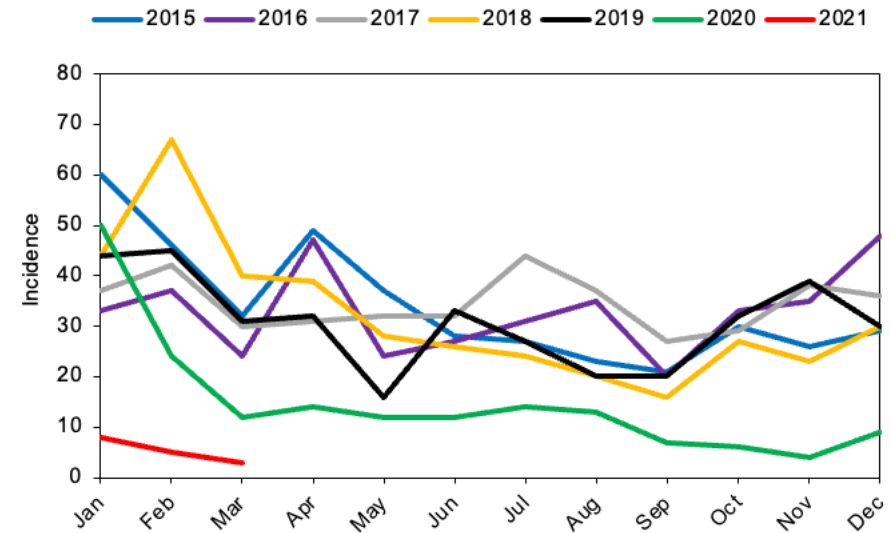

(C) All-cause pneumonia

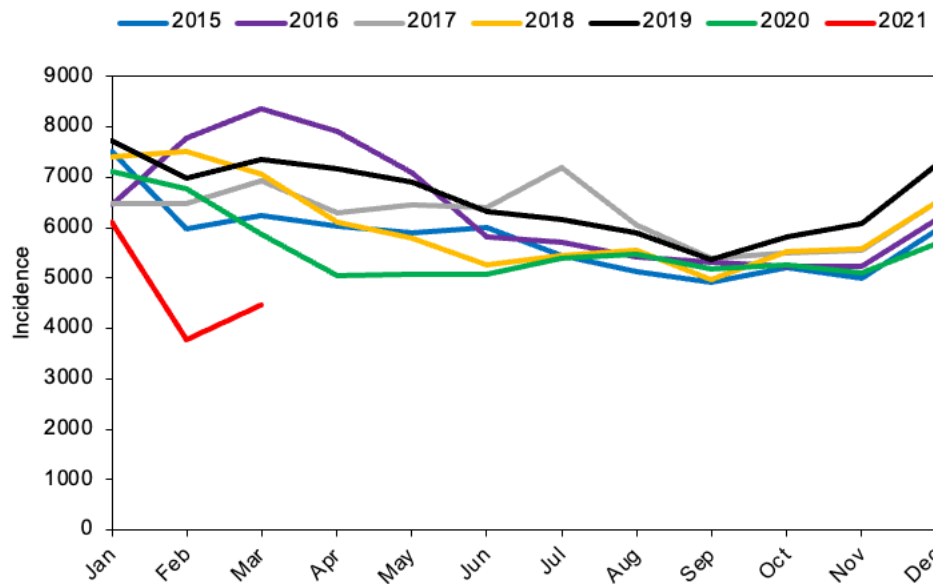

(D) Influenza

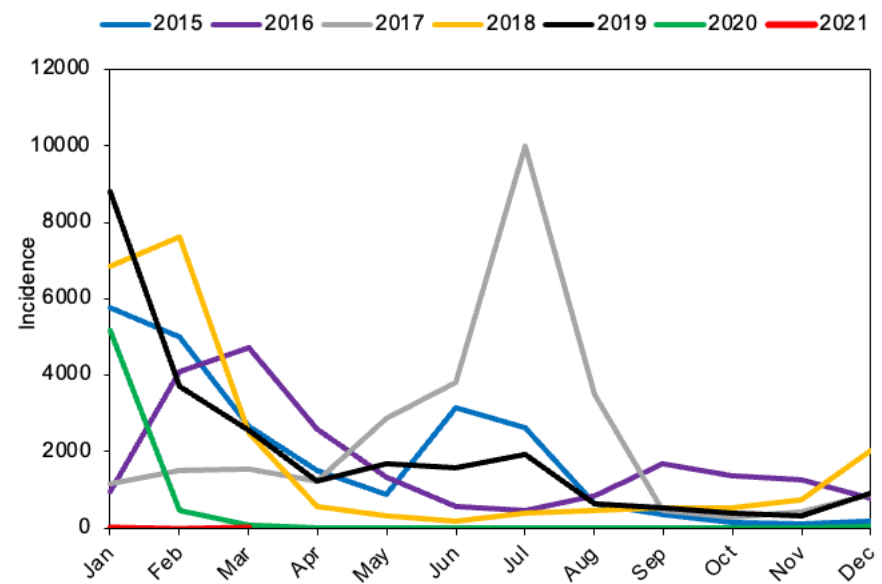



**Table S1.** Trend analysis of monthly number of hospitalization by age groups in periods before and after the COVID-19 pandemic

|                                   | Relative risk (95% CI)   |                          | Change in trend#               |
|-----------------------------------|--------------------------|--------------------------|--------------------------------|
|                                   | Period 1 ^               | Period 3^                |                                |
| <b>IPD</b>                        |                          |                          |                                |
| All ages                          | 1.0020 (0.9977-1.064)    | 0.8484 (0.7501-0.9597)** | -70.39% (-86.55% to -34.73%)** |
| 18-49 years                       | 1.0129 (1.0022-1.0238)   | 0.5272 (0.2176-1.2772)   | -31.27% (-89.72% to 359.72%)   |
| 50-64 years                       | 0.9969 (0.9888-1.0051)   | 0.9585 (0.8087-1.1362)   | -70.43% (-92.80% to 21.42%)    |
| 65 years or above                 | 1.0012 (0.9953-1.0071)   | 0.7777 (0.6111-0.9897)*  | -70.83% (-91.59% to 1.12%)     |
| <b>Pneumococcal<br/>Pneumonia</b> |                          |                          |                                |
| All ages                          | 0.9978(0.9953-1.0004)    | 0.9042(0.8621-0.9483)*** | -42.79% (-59.36% to -19.48%)*  |
| 18-49 years                       | 0.9964(0.9887-1.0042)    | 0.6768(0.2171-2.1093)    | -32.32% (-78.29% to 110.93%)   |
| 50-64 years                       | 0.9962(0.9907-1.0017)    | 0.9174(0.8260-1.0189)    | -50.21% (-76.93% to 7.48%)     |
| 65 years or above                 | 0.9986(0.9954-1.0017)    | 0.9107(0.8612-0.9640)*   | -41.19% (-60.82% to -11.73%)*  |
| <b>All-cause pneumonia</b>        |                          |                          |                                |
| All ages                          | 1.0014(1.0012-1.0016)*** | 0.9835(0.9815-0.9855)*** | -11.24% (-12.76% to -9.7%)***  |
| 18-49 years                       | 1.0000(0.9992-1.0008)    | 0.9263(0.9164-0.9364)*** | -6.05% (-13.41% to 1.94%)      |
| 50-64 years                       | 1.0015(1.0009-1.0021)*** | 0.9620(0.9556-0.9684)*** | -9.32% (-14.14% to -4.22%)***  |
| 65 years or above                 | 1.0011(1.0009-1.0013)*** | 0.9879(0.9858-0.9901)*** | -13.30% (-12.94% to -9.64%)*** |

^Trend in period 1 (January 2015 to December 2019) and 3 (March 2020 to March 2021), the (relative risk expressed the month-to-month change in hospitalization numbers

#Estimate the change in trend in the mean monthly number of cases in period 3, compare with the monthly trend in period 1

\*p <0.05 to 0.01, \*\*p <0.01 to 0.005, \*\*\*p<0.005

## STROBE Statement—checklist of items that should be included in reports of observational studies

|                              | Item No | Recommendation                                                                                                                                                                                                                                                                                                                                                                                                                                                         | Page No |
|------------------------------|---------|------------------------------------------------------------------------------------------------------------------------------------------------------------------------------------------------------------------------------------------------------------------------------------------------------------------------------------------------------------------------------------------------------------------------------------------------------------------------|---------|
| <b>Title and abstract</b>    | 1       | (a) Indicate the study's design with a commonly used term in the title or the abstract                                                                                                                                                                                                                                                                                                                                                                                 | 1       |
|                              |         | (b) Provide in the abstract an informative and balanced summary of what was done and what was found                                                                                                                                                                                                                                                                                                                                                                    | 2       |
| <b>Introduction</b>          |         |                                                                                                                                                                                                                                                                                                                                                                                                                                                                        |         |
| Background/rationale         | 2       | Explain the scientific background and rationale for the investigation being reported                                                                                                                                                                                                                                                                                                                                                                                   | 4-5     |
| Objectives                   | 3       | State specific objectives, including any prespecified hypotheses                                                                                                                                                                                                                                                                                                                                                                                                       | 5       |
| <b>Methods</b>               |         |                                                                                                                                                                                                                                                                                                                                                                                                                                                                        |         |
| Study design                 | 4       | Present key elements of study design early in the paper                                                                                                                                                                                                                                                                                                                                                                                                                | 6       |
| Setting                      | 5       | Describe the setting, locations, and relevant dates, including periods of recruitment, exposure, follow-up, and data collection                                                                                                                                                                                                                                                                                                                                        | 6,7     |
| Participants                 | 6       | (a) <i>Cohort study</i> —Give the eligibility criteria, and the sources and methods of selection of participants. Describe methods of follow-up<br><i>Case-control study</i> —Give the eligibility criteria, and the sources and methods of case ascertainment and control selection. Give the rationale for the choice of cases and controls<br><i>Cross-sectional study</i> —Give the eligibility criteria, and the sources and methods of selection of participants | 6,7     |
|                              |         | (b) <i>Cohort study</i> —For matched studies, give matching criteria and number of exposed and unexposed<br><i>Case-control study</i> —For matched studies, give matching criteria and the number of controls per case                                                                                                                                                                                                                                                 | 6,7     |
| Variables                    | 7       | Clearly define all outcomes, exposures, predictors, potential confounders, and effect modifiers. Give diagnostic criteria, if applicable                                                                                                                                                                                                                                                                                                                               | 6,7     |
| Data sources/<br>measurement | 8*      | For each variable of interest, give sources of data and details of methods of assessment (measurement). Describe comparability of assessment methods if there is more than one group                                                                                                                                                                                                                                                                                   | 6,7     |
| Bias                         | 9       | Describe any efforts to address potential sources of bias                                                                                                                                                                                                                                                                                                                                                                                                              | 7       |
| Study size                   | 10      | Explain how the study size was arrived at                                                                                                                                                                                                                                                                                                                                                                                                                              | 6,7     |
| Quantitative variables       | 11      | Explain how quantitative variables were handled in the analyses. If applicable, describe which groupings were chosen and why                                                                                                                                                                                                                                                                                                                                           | 7,8     |
| Statistical methods          | 12      | (a) Describe all statistical methods, including those used to control for confounding                                                                                                                                                                                                                                                                                                                                                                                  | 7,8     |
|                              |         | (b) Describe any methods used to examine subgroups and interactions                                                                                                                                                                                                                                                                                                                                                                                                    | 7,8     |
|                              |         | (c) Explain how missing data were addressed                                                                                                                                                                                                                                                                                                                                                                                                                            | N/A     |
|                              |         | (d) <i>Cohort study</i> —If applicable, explain how loss to follow-up was addressed<br><i>Case-control study</i> —If applicable, explain how matching of cases and controls was addressed<br><i>Cross-sectional study</i> —If applicable, describe analytical methods taking account of sampling strategy                                                                                                                                                              | N/A     |
|                              |         | (e) Describe any sensitivity analyses                                                                                                                                                                                                                                                                                                                                                                                                                                  | 7,8     |

Continued on next page

1  
2  
3  
4  
5  
6  
7  
8  
9  
10  
11  
12  
13  
14  
15  
16  
17  
18  
19  
20  
21  
22  
23  
24  
25  
26  
27  
28  
29  
30  
31  
32  
33  
34  
35  
36  
37  
38  
39  
40  
41  
42  
43  
44  
45  
46  
47  
48  
49  
50  
51  
52  
53  
54  
55  
56  
57  
58  
59  
60**Results**

|                  |     |                                                                                                                                                                                                              |       |
|------------------|-----|--------------------------------------------------------------------------------------------------------------------------------------------------------------------------------------------------------------|-------|
| Participants     | 13* | (a) Report numbers of individuals at each stage of study—eg numbers potentially eligible, examined for eligibility, confirmed eligible, included in the study, completing follow-up, and analysed            | 10-13 |
|                  |     | (b) Give reasons for non-participation at each stage                                                                                                                                                         | N/A   |
|                  |     | (c) Consider use of a flow diagram                                                                                                                                                                           | N/A   |
| Descriptive data | 14* | (a) Give characteristics of study participants (eg demographic, clinical, social) and information on exposures and potential confounders                                                                     | 10-13 |
|                  |     | (b) Indicate number of participants with missing data for each variable of interest                                                                                                                          | N/A   |
|                  |     | (c) <i>Cohort study</i> —Summarise follow-up time (eg, average and total amount)                                                                                                                             |       |
| Outcome data     | 15* | <i>Cohort study</i> —Report numbers of outcome events or summary measures over time                                                                                                                          | 10-13 |
|                  |     | <i>Case-control study</i> —Report numbers in each exposure category, or summary measures of exposure                                                                                                         |       |
|                  |     | <i>Cross-sectional study</i> —Report numbers of outcome events or summary measures                                                                                                                           |       |
| Main results     | 16  | (a) Give unadjusted estimates and, if applicable, confounder-adjusted estimates and their precision (eg, 95% confidence interval). Make clear which confounders were adjusted for and why they were included | 10-13 |
|                  |     | (b) Report category boundaries when continuous variables were categorized                                                                                                                                    |       |
|                  |     | (c) If relevant, consider translating estimates of relative risk into absolute risk for a meaningful time period                                                                                             |       |
| Other analyses   | 17  | Report other analyses done—eg analyses of subgroups and interactions, and sensitivity analyses                                                                                                               | 10-13 |

**Discussion**

|                  |    |                                                                                                                                                                            |       |
|------------------|----|----------------------------------------------------------------------------------------------------------------------------------------------------------------------------|-------|
| Key results      | 18 | Summarise key results with reference to study objectives                                                                                                                   | 14-15 |
| Limitations      | 19 | Discuss limitations of the study, taking into account sources of potential bias or imprecision. Discuss both direction and magnitude of any potential bias                 | 16    |
| Interpretation   | 20 | Give a cautious overall interpretation of results considering objectives, limitations, multiplicity of analyses, results from similar studies, and other relevant evidence | 14-16 |
| Generalisability | 21 | Discuss the generalisability (external validity) of the study results                                                                                                      | 14-15 |

**Other information**

|         |    |                                                                                                                                                               |   |
|---------|----|---------------------------------------------------------------------------------------------------------------------------------------------------------------|---|
| Funding | 22 | Give the source of funding and the role of the funders for the present study and, if applicable, for the original study on which the present article is based | 3 |
|---------|----|---------------------------------------------------------------------------------------------------------------------------------------------------------------|---|

\*Give information separately for cases and controls in case-control studies and, if applicable, for exposed and unexposed groups in cohort and cross-sectional studies.

**Note:** An Explanation and Elaboration article discusses each checklist item and gives methodological background and published examples of transparent reporting. The STROBE checklist is best used in conjunction with this article (freely available on the Web sites of PLoS Medicine at <http://www.plosmedicine.org/>, Annals of Internal Medicine at <http://www.annals.org/>, and Epidemiology at <http://www.epidem.com/>). Information on the STROBE Initiative is available at [www.strobe-statement.org](http://www.strobe-statement.org).

# BMJ Open

## **Invasive pneumococcal disease, pneumococcal pneumonia and all-cause pneumonia in Hong Kong during the COVID-19 pandemic compared with the preceding 5 years: a retrospective observational study**

|                                 |                                                                                                                                                                                                                                                                                                   |
|---------------------------------|---------------------------------------------------------------------------------------------------------------------------------------------------------------------------------------------------------------------------------------------------------------------------------------------------|
| Journal:                        | <i>BMJ Open</i>                                                                                                                                                                                                                                                                                   |
| Manuscript ID                   | bmjopen-2021-055575.R2                                                                                                                                                                                                                                                                            |
| Article Type:                   | Original research                                                                                                                                                                                                                                                                                 |
| Date Submitted by the Author:   | 28-Sep-2021                                                                                                                                                                                                                                                                                       |
| Complete List of Authors:       | Chan, King-Pui Florence; Queen Mary Hospital, Department of Medicine<br>Ma, Ting-Fung; University of Wisconsin-Madison, Department of Statistics<br>Ip, Mary; University of Hong Kong<br>Ho, Pak-leung; Queen Mary Hospital, Microbiology; University of Hong Kong, Carol Yu Centre for Infection |
| <b>Primary Subject Heading</b>: | Infectious diseases                                                                                                                                                                                                                                                                               |
| Secondary Subject Heading:      | Epidemiology, Public health, Respiratory medicine                                                                                                                                                                                                                                                 |
| Keywords:                       | COVID-19, Respiratory infections < THORACIC MEDICINE, Thoracic medicine < INTERNAL MEDICINE, Epidemiology < INFECTIOUS DISEASES, Public health < INFECTIOUS DISEASES                                                                                                                              |
|                                 |                                                                                                                                                                                                                                                                                                   |

SCHOLARONE™  
Manuscripts



I, the Submitting Author has the right to grant and does grant on behalf of all authors of the Work (as defined in the below author licence), an exclusive licence and/or a non-exclusive licence for contributions from authors who are: i) UK Crown employees; ii) where BMJ has agreed a CC-BY licence shall apply, and/or iii) in accordance with the terms applicable for US Federal Government officers or employees acting as part of their official duties; on a worldwide, perpetual, irrevocable, royalty-free basis to BMJ Publishing Group Ltd ("BMJ") its licensees and where the relevant Journal is co-owned by BMJ to the co-owners of the Journal, to publish the Work in this journal and any other BMJ products and to exploit all rights, as set out in our [licence](#).

The Submitting Author accepts and understands that any supply made under these terms is made by BMJ to the Submitting Author unless you are acting as an employee on behalf of your employer or a postgraduate student of an affiliated institution which is paying any applicable article publishing charge ("APC") for Open Access articles. Where the Submitting Author wishes to make the Work available on an Open Access basis (and intends to pay the relevant APC), the terms of reuse of such Open Access shall be governed by a Creative Commons licence – details of these licences and which [Creative Commons](#) licence will apply to this Work are set out in our licence referred to above.

Other than as permitted in any relevant BMJ Author's Self Archiving Policies, I confirm this Work has not been accepted for publication elsewhere, is not being considered for publication elsewhere and does not duplicate material already published. I confirm all authors consent to publication of this Work and authorise the granting of this licence.

1  
2  
3 1 **Title: Invasive pneumococcal disease, pneumococcal pneumonia and all-**  
4 **cause pneumonia in Hong Kong during the COVID-19 pandemic compared**  
5 **with the preceding 5 years: a retrospective observational study**  
6  
7  
8

9 4  
10  
11 5 King-Pui Florence Chan, MBBS<sup>1</sup>, Ting-Fung Ma, MPhil<sup>2</sup>, Mary Sau-Man Ip<sup>1</sup>, MD,  
12 Pak-Leung Ho, MD<sup>3</sup>  
13  
14  
15 7  
16  
17

18 8 **Authors' affiliations:**

- 19  
20  
21 9 1. Department of Medicine, University of Hong Kong, Queen Mary Hospital, Hong  
22 Kong SAR, China  
23  
24 11 2. Department of Statistics, University of Wisconsin - Madison, United States of  
25 America  
26 12  
27 13 3. Department of Microbiology, and Carol Yu Centre for Infection, University of  
28 Hong Kong, Hong Kong SAR, China  
29  
30  
31

32 15 **ORCID:** [0000-0003-2094-1206](https://orcid.org/0000-0003-2094-1206) (King-Pui Florence Chan); [0000-0001-6028-5640](https://orcid.org/0000-0001-6028-5640)  
33 (Ting-Fung Ma); [0000-0002-8692-6933](https://orcid.org/0000-0002-8692-6933) (Mary Sau-Man Ip); [0000-0002-8811-1308](https://orcid.org/0000-0002-8811-1308)  
34 (Pak-Leung Ho)  
35  
36  
37 18

38  
39 19 **Correspondence to:**

40  
41  
42 20 Pak-Leung Ho

43  
44 21 Department of Microbiology and Carol Yu Centre for Infection, Queen Mary Hospital,  
45 University of Hong Kong, Pokfulam Road, Hong Kong SAR, China  
46  
47

48  
49 23 Email: [plho@hku.hk](mailto:plho@hku.hk)

50  
51 24 Tel: 852-2255-2579  
52  
53  
54  
55  
56  
57  
58  
59  
60

1  
2  
3 26 **Abstract**

4  
5 27 **Objectives:** To compare the incidence and severity of invasive pneumococcal  
6  
7 28 diseases (IPD), pneumococcal pneumonia and all-cause pneumonia during COVID-  
8  
9 29 19 pandemic period with universal masking and social distancing to that of previous  
10  
11 30 5 years.

12  
13 31 **Design:** Retrospective observational study on incidence of invasive pneumococcal  
14  
15 32 diseases (IPD), pneumococcal pneumonia and all-cause pneumonia between  
16  
17 33 January 2015-December 2019 and March 2020-March 2021. January-February 2020  
18  
19 34 was excluded from analysis as it was treated as transitional period between normal  
20  
21 35 time and pandemic.

22  
23 36 **Setting:** Episode-based data by retrieval of hospitalization records from the Hospital  
24  
25 37 Authority's territory-wide electronic medical record database in Hong Kong.

26  
27 38 **Participants:** Hospitalized patients with invasive pneumococcal diseases (IPD)  
28  
29 39 (n=742), pneumococcal pneumonia (n=2163) and all-cause pneumonia (including  
30  
31 40 COVID-19 pneumonia, n=453,999) at age 18 or above. Control diagnoses were  
32  
33 41 included to assess confounding from health-seeking behaviors.

34  
35 42 **Primary and secondary outcome:** Primary outcome is the incidence of diseases  
36  
37 43 between two periods. Secondary outcomes include disease severity surrogated by  
38  
39 44 length of stay and mortality.

40  
41 45 **Results:** Monthly average number of IPD, pneumococcal pneumonia and all-cause  
42  
43 46 pneumonia hospitalization significantly decreased by 88.9% (95%CI 79.8%-98.0%,  
44  
45 47  $p<0.0005$ ), 72.5% (95%CI 65.9%-79.1%,  $p<0.0005$ ) and 17.5% (95%CI 16.8%-  
46  
47 48 18.2%,  $p<0.0005$ ), respectively. Change in trend from January 2015-December 2019  
48  
49 49 to March 2020-March 2021 was -70% (95%CI -87% to -35%,  $p=0.0025$ ), -43%  
50  
51 50 (95%CI -59% to -19%,  $p=0.0014$ ) and -11% (95%CI -13% to -10%,  $p<0.0005$ ),  
52  
53 51 respectively. Length of stay for IPD and pneumococcal pneumonia episodes were  
54  
55 52 insignificantly different in the two periods. No reductions in hospitalizations for control  
56  
57 53 diagnoses were observed.

56  
57 54 **Conclusions:** Incidence of IPD, pneumococcal pneumonia, and all-cause  
58  
59 55 pneumonia decreased during COVID-19 pandemic. This was observed with  
60



1  
2  
3 56 universal masking and social distancing. We postulated this is related to reduced  
4  
5 57 transmission of respiratory viruses and bacteria.  
6  
7  
8 58

9  
10 59 **Strength and limitations of this study:**

- 11  
12 60 • A territory-wide study with near 100% practice of universal masking and  
13  
14 61 wide practice of social distancing  
15  
16 62 • Other factors including temperature and air quality were also included in  
17  
18 63 our analysis  
19  
20 64 • Disease severity of IPD, pneumococcal pneumonia, and all-cause  
21  
22 65 pneumonia were compared between the two periods  
23  
24 66 • Data from private sector (<10%) were not included in our study  
25  
26 67 • The causal relationship cannot be ascertained from this retrospective  
27  
28 68 study  
29

30 70 **Funding:** This work is partly funded by a grant from the Health and Medical  
31  
32 71 Research Fund (reference number CID-HKU1-13), Food and Health Bureau, The  
33  
34 72 Government of the Hong Kong Special Administrative Region.  
35

36 74 **Competing interests:** There are no competing interests.  
37  
38 75

39  
40 76 **Data availability statements:** No additional data is available.  
41  
42 77

43 78 **Authors' contributions:**

44  
45 79 **King-Pui Florence Chan and Ting-Fung Ma** were involved in study concept and  
46  
47 80 design; acquisition, analysis and interpretation of data; drafting the work and final  
48  
49 81 approval of the manuscript. **Mary Sau-Man Ip** were involved in critical revision of  
50  
51 82 manuscript for important intellectual content and final approval of the manuscript.  
52  
53 83 **Pak-Leung Ho** was involved in study concept and design; analysis and  
54  
55 84 interpretation of data; drafting of manuscript; critical revision of the manuscript for  
56  
57 85 important intellectual content; study supervision; and approval of the final version of  
58  
59 86 the manuscript.  
60 87

1  
2  
3  
4  
5  
6  
7  
8  
9  
10  
11  
12  
13  
14  
15  
16  
17  
18  
19  
20  
21  
22  
23  
24  
25  
26  
27  
28  
29  
30  
31  
32  
33  
34  
35  
36  
37  
38  
39  
40  
41  
42  
43  
44  
45  
46  
47  
48  
49  
50  
51  
52  
53  
54  
55  
56  
57  
58  
59  
60

88 **Word count:** 4174

89 **Keywords:** pneumococcal, COVID-19, masking, regression analysis

90

For peer review only

## 91 Text

### 92 Introduction

93 Coronavirus disease 2019 (COVID-19) due to severe acute respiratory syndrome  
94 coronavirus 2 (SARS-CoV-2) infections was first reported in late 2019 [1]. It became  
95 a global pandemic and was declared as a public health emergency of international  
96 concern on 30 January 2020 by the World Health Organization [2]. As of 22  
97 September 2021, more than 229 million people were infected, causing more than 4.7  
98 million deaths globally.

99 Pneumococcal disease is caused by *Streptococcus pneumoniae* infection, with at  
100 least 100 known serotypes of pneumococci [3]. Pneumococcal disease can be  
101 roughly divided into non-invasive disease and invasive disease. Non-invasive  
102 disease includes sinusitis, acute otitis media and pneumonia. Invasive  
103 pneumococcal disease (IPD) is defined as isolation of *Streptococcus pneumoniae*  
104 from a normally sterile sites, including blood and cerebrospinal fluid [4]. IPD is a  
105 notifiable disease in Hong Kong since 9th January 2015. Pneumococcal infection is  
106 a major cause of morbidity and mortality worldwide [5], with 1.6 million estimated  
107 deaths annually in 2005 [6]. Incidence of IPD and mortality of pneumococcal  
108 pneumonia are higher at extremes of age [7-8].

109 The first pneumococcal conjugated vaccine (PCV), Prevnar 7 (PCV7) was  
110 introduced to United States in 2000 and incorporated in Hong Kong Childhood  
111 Immunisation Programme for children under 2 years old since September 2009 [9-  
112 10]. In Hong Kong, PCV7 was replaced by the 10-valent and 13-valent  
113 pneumococcal conjugate vaccines (PCV10 and PCV13) in 2010 and 2011  
114 respectively [11-12]. PCV13 was effective in preventing vaccine-type pneumococcal  
115 pneumonia, bacteraemia and nonbacteraemic community-acquired pneumonia [13].  
116 Decline in incidences of all-cause pneumonia in children and elderly was reported  
117 after implementation of PCV in childhood vaccination program [14-15]. 23-valent  
118 polysaccharide vaccine (PPSV23) was effective in preventing pneumococcal  
119 pneumonia and reducing mortality from pneumococcal pneumonia in nursing home  
120 residents [16]. In our locality, elderly at age 65 years and above without high risk  
121 conditions, namely immunodeficiency or chronic cardiac, pulmonary, liver or renal  
122 disease, or diabetes mellitus were recommended to receive either a single dose of

1  
2  
3 123 PCV13 or a single dose of PPSV23. Number of PPSV23 vaccine recipients at age  
4  
5 124 65 years or above increased from 35,000 in year 2015/2016 to 81,700 in 2019/2020,  
6  
7 125 with approximately 46% of population in the age group cumulatively vaccinated in  
8  
9 126 2020 [17]. Pneumonia is a common disease causing hospitalization, accounting for  
10  
11 127 2.9% of all inpatient discharges and death in Hong Kong [18]. It is the second  
12  
13 128 leading cause of death with age specific death rates increased markedly after age 65  
14  
15 129 [17].  
16

130

17 131 Whether patients with COVID-19 are more susceptible to pneumococcal  
18  
19 132 superinfection is still under debate. Superinfection of pneumococcal in COVID-19  
20  
21 133 patients was reported [19]. Yet, low frequency of bacterial coinfection in patients with  
22  
23 134 early COVID-19 was also observed [20-21]. There is limited evidence on the  
24  
25 135 incidence and severity of IPD, pneumococcal pneumonia, and all-cause pneumonia  
26  
27 136 during COVID-19 pandemic, especially in area where universal masking and social  
28  
29 137 distancing were widely practiced. Since January 2020, universal masking in public  
30  
31 138 area was voluntarily performed by Hong Kong citizens against COVID-19. Cross  
32  
33 139 sectional telephone self-reported surveys by the Hong Kong Public Opinion  
34  
35 140 Research Institute (HKPORI) showed percentage of wearing mask was 74.5% on  
36  
37 141 20th-23rd January 2020 (n=1,008), 97.6% on 5th-20th February (n=10,405) and  
38  
39 142 98.9% on 4th-19th March (n=15,739) [22]. On 23rd July 2020, masking was  
40  
41 143 mandatory in public area upon the introduction of Prevention and Control of Disease  
42  
43 144 (Wearing of Mask) Regulation (Cap. 599I). Social distancing measurements were  
44  
45 145 voluntarily practiced by public and implemented by government since 25th January  
46  
47 146 2020. These public health interventions were shown to associate with relatively low  
48  
49 147 rate of COVID-19 and early termination of influenza season in Hong Kong [23]. Our  
50  
51 148 previous studies suggested universal masking and social distancing were associated  
52  
53 149 with significant reduction in acute exacerbation of chronic obstructive pulmonary  
54  
55 150 disease and asthma in Hong Kong [24,25]. In the current study, we hypothesized  
56  
57 151 that the aforementioned COVID-19 related public health interventions and reduction  
58  
59 152 in respiratory virus activities would be associated with reduction in hospitalization  
60  
153 due to pneumococcal infections and pneumonia in general.

## 155 **Materials and Methods**

156 A retrospective study assessing the numbers of IPD, pneumococcal pneumonia, and  
157 all-cause pneumonia which required hospital hospitalization during the period of  
158 COVID-19 in Hong Kong, comparing with that in the preceding five years as baseline  
159 was conducted. The study period was 1st January 2015 to 31st March 2021 with  
160 exclusion of 1st January 2020 to 28th February 2020 from analysis, when public  
161 health practices such as mask wearing were not yet fully adopted.

### 163 **Data source**

164 Episode-based data was obtained by retrieval of hospitalization records from the  
165 Hospital Authority's territory-wide electronic medical record database, Clinical Data  
166 Analysis and Reporting System (CDARS), which provides 90% of in-patient hospital  
167 care service in Hong Kong [24,25].

169 Diagnosis code of pneumococcal pneumonia (ICD-9 code 481) was searched on  
170 CDARS. IPD is a notifiable disease since January 2015 with monthly number notified  
171 cases and age obtained from the Department of Health, Hong Kong Special  
172 Administrative Region (HKSAR). Monthly number of influenza virus detection was  
173 collected from a territory-wide laboratory surveillance for both in-patients and out-  
174 patients in both public and private medical sectors from the Centre for Health  
175 Protection (CHP), HKSAR [17].

177 All-cause pneumonia including the following ICD-9 codes for viral, bacterial,  
178 tuberculous, fungal and unspecified pneumonia, pneumonia due to inhalation of food  
179 or vomitus and lung abscess were obtained from CDARS (ICD-9 code 003.22,  
180 055.1, 0.1160-1.1166, 112.4, 115, 117.3, 480, 481, 482, 483.1, 483.8, 485, 486, 487,  
181 507.0, 513). Patient with COVID-19 associated pneumonia was included in the all-  
182 cause pneumonia dataset. The contribution of COVID-19 within all-cause pneumonia  
183 was queried using ICD codes for COVID-19 disease (ICD-9 code 079.89, 480.8,  
184 519.8). Demographics data (including sex, age), clinical data (including  
185 hospitalization date, length of stay, episode death, date of death) were collected. The  
186 results including admission number of various diseases were available in the CHP  
187 website and the Hospital Authority Statistics Report [17,26].

188

**Inclusion/ exclusion criteria**

Patients with 1) age 18 or above 2) hospitalization for the listed diseases (pneumococcal pneumonia, IPD and pneumonia) were included in the study.

192

Children at aged 0 to 17 years old were excluded in this study. Duplicated record of single patient with different diagnoses in same hospital admission were removed.

195

**Other diagnoses**

Number of hospitalization for other common medical and surgical conditions including acute kidney injury (ICD-9 code 580, 584), fracture hip (ICD-9 code 820) and peritonitis due to peritoneal dialysis (PD peritonitis) (ICD-9 code 996.68) were collected. These were included to evaluate the possibility of decrease in hospital attendance due to various reasons such as fear of COVID-19 infection in hospital. These diseases were selected as are non-communicable diseases and have minimal interactions with environmental factors including mean ambient temperature and air-pollution.

205

**Other variables**

Monthly mean ambient temperature was obtained from the Hong Kong Observatory [27]. Air quality was measured by air quality health index (AQHI), which is calculated based on the cumulative health risk attributable to a 3-hour moving average concentrations of ozone, nitrogen dioxide, sulphur dioxide and particulate matter [28]. It was reported in scale of 1 to 10 and 10+ and grouped into five health risk categories, namely low [1-3], moderate [4-6], high [7], very high [8-10] and serious [10+] with different precautionary actions were advised. People with respiratory illness were advised to minimize their outdoor stay when AQHI high to serious. The AQHI was reported hourly in 13 stations located in different area of Hong Kong. The total number of hours with AQHI recorded as high to serious grades were expressed as percentage of total number of hours collected in a month.

218

**Statistical method**

Total number of hospitalizations due to IPD, pneumococcal pneumonia and all-cause pneumonia were collected and analysed. Each disease was further divided into three

1  
2  
3 222 different age groups, including 18 to 49 years, 50 to 64 years, and 65 years or above  
4  
5 223 for analysis.  
6  
7 224

8 225 Analysis was done on the number of hospitalizations between January 2015 to  
9  
10 226 December 2019, the period prior COVID-19 (period 1) and March 2020 to March  
11  
12 227 2021 (period 3), while January to February 2020 (period 2) was treated as transition  
13  
14 228 period and excluded from the analysis. Wilcoxon rank sum test was first used to  
15  
16 229 analyse the statistical significance of number of hospitalizations between period 1  
17  
18 230 and period 3. Generalized linear models were then applied for statistical inference of  
19  
20 231 various types of responses. Log-linear model was used for studying the effect of  
21  
22 232 pandemic as intervention under segmented regression framework in term of the  
23  
24 233 change in trend (i.e. an increase or decrease in the level of the segment) between  
25  
26 234 period 1 (pre-intervention segment) and period 3 (post-intervention segment) on the  
27  
28 235 monthly hospitalization count. Regression coefficients of log-linear model can be  
29  
30 236 interpreted as the effect due to pandemic by log-linear model [29]. We assumed  
31  
32 237 temporal dependence can be adjusted by the effect of pandemic, including masking,  
33  
34 238 social distancing and other behavioural changes, and climate related variables  
35  
36 239 including temperature and AQHI.  
37  
38 240

39 241 Generalized linear model was used for comparing the mortality rate of individuals  
40  
41 242 between the two time periods [30]. Hospitalization length of stay (LOS) was  
42  
43 243 described in days using median and standard deviation. Statistical inference of the  
44  
45 244 LOS in hospitalization of individuals was done by Wilcoxon rank sum test with odds  
46  
47 245 ratio and relative risks and confidence intervals calculated [29].  
48  
49 246

50 247 Monthly incidence rate for each disease was calculated using the total population  
51  
52 248 followed by age groups stratification (18 to 49 years, 50 to 64 years and  $\geq 65$  years)  
53  
54 249 and expressed as number per 100,000 person-year. Age-specific population data  
55  
56 250 was obtained from the Census and Statistics Department.  
57  
58 251

### 59 252 ***Ethics Approval***

60 253 The study was approved by the Institutional Review Board of the University of Hong  
254  
255 Kong/ Hospital Authority Hong Kong West Cluster (Reference Number UW-21-325).



1  
2  
3  
4  
5  
6  
7  
8  
9  
10  
11  
12  
13  
14  
15  
16  
17  
18  
19  
20  
21  
22  
23  
24  
25  
26  
27  
28  
29  
30  
31  
32  
33  
34  
35  
36  
37  
38  
39  
40  
41  
42  
43  
44  
45  
46  
47  
48  
49  
50  
51  
52  
53  
54  
55  
56  
57  
58  
59  
60

256 ***Patient and public involvement***

257 Patients or the public were not involved in the design, or conduct, or reporting, or  
258 dissemination plans of our research.

For peer review only

## 260 **Results**

### 261 ***Invasive pneumococcal disease***

262 The total number of notified IPD episodes was 742 in the entire study, with 699  
263 reported in period 1 and 17 reported in period 3. Pneumococcal serotypes for 684 of  
264 the 699 episodes in period 1, and 13 of the 17 episodes in period 3 were  
265 successfully determined. The proportions attributed to PCV13 serotypes was 66.5%  
266 (465/699) and 29.4% (5/17) respectively for period 1 and period 3. Serotype 3 was  
267 the commonest serotype in both periods, accounting for 41.3% (289/699) and 17.6%  
268 (3/17) of total, respectively. From period 1 to period 3, the monthly number of IPD  
269 caused by PCV13 serotypes declined by 95.1% (95%CI 93.4%-96.4%) while those  
270 for non-PCV13 serotypes declined by 83.0% (95%CI 78.8%-86.5%), and those for  
271 PPSV23 serotypes declined by 94.1% (95% CI 92.3%-95.5%). The small difference  
272 between declines in PCV13 and PPSV23 serotypes was mainly attributed to  
273 serotype 6A which was included in PCV13 but not in PPSV23.

274

275 Monthly number of IPD peaked in January-February each year except in 2016, with  
276 the peak in April (Figure 1A and Figure S1). Monthly average number of notified IPD  
277 episodes was  $11.7 \pm 6.2$  in period 1, with significant decrease to  $1 \pm 4.3$  in period 3  
278 ( $p < 0.0005$ ). By log-linear model segmented regression, relative risk of IPD in period  
279 3 was 0.85 (95%CI 0.75-0.96,  $p = 0.0089$ ) (Table S1). Further analysis on the relative  
280 risk of different age groups showed significant decline in relative risk of IPD in aged  
281  $\geq 65$  years (0.78, 95%CI 0.61-0.99,  $p = 0.041$ ). Estimated change in trend in the mean  
282 number of cases from period 1 to period 3 was -70% (95%CI -87% to -35%,  
283  $p = 0.0025$ ) (Figure 1A, Table S1).

284

285 Incidence rate per 100,000 person-years was 2.2 in period 1 and 0.2 in period 3, with  
286 an interval reduction of 88.9% (95%CI 79.8%-98.0%,  $p < 0.0005$ ). Incidence rate ratio  
287 between period 1 and period 3 was 0.11 (95%CI 0.07-0.18,  $p < 0.0005$ ) (Table 1). IPD  
288 is most prevalent in age  $\geq 65$ . The magnitude of reduction in incidence rate was  
289 similar across different age groups, ranging from 81.3% to 93.5% ( $p < 0.0005$  for all  
290 age groups) (Table 1).

291

1  
2  
3 292 The overall median LOS for IPD was 12 (Interquartile range, IQR 16) days in period  
4  
5 293 1 and 12 (IQR 11) days in period 3 (Table 2), with statistically insignificant difference  
6  
7 294 (p=0.89). Statistically insignificant variations in LOS of different age groups were  
8  
9 295 observed.

10 296

### 11 297 ***Pneumococcal pneumonia***

12 298 In the entire study period, there were 2,163 episodes of hospitalization for  
13  
14 299 pneumococcal pneumonia, with 1970 episodes in period 1 and 119 episodes in  
15  
16 300 period 3 (Table 1). Monthly number of pneumococcal pneumonia was peaked in  
17  
18 301 January-February each year except in 2016, with the peak in April (Figure 1B and  
19  
20 302 Figure S1). The average monthly hospitalizations was  $32.8 \pm 9.9$  episodes in period 1,  
21  
22 303 with significant drop to  $9.2 \pm 3.9$  episodes in period 3 ( $p < 0.0005$ ). By log-linear model  
23  
24 304 segmented regression, relative risk of pneumococcal pneumonia was 0.90 (95%CI  
25  
26 305 0.86-0.95,  $p < 0.005$ ) in period 3. Trend analysis revealed a change of -43% (95%CI -  
27  
28 306 59% to -19%,  $p = 0.0014$ , Figure 1B, Table S1) from period 1 to period 3. Age groups  
29  
30 307 analysis showed similar change in trend for all age groups, with statistically  
31  
32 308 significance in aged  $\geq 65$  years (-41%, 95%CI -61% to -12%,  $p = 0.010$ ) from period 1  
33  
34 309 to period 3 (Table S1, Figure S2).

35 310

36 311 Overall, the incidence rate of hospitalization for pneumococcal pneumonia  
37  
38 312 decreased significantly by 72.5% (95%CI 65.9%-79.1%,  $p < 0.0005$ ), from 6.2 per  
39  
40 313 100,000 person-years in period 1 to 1.7 per 100,000 person-years in period 3.  
41  
42 314 Incidence rate ratio between period 1 and period 3 was 0.28 (95%CI 0.23-0.33,  
43  
44 315  $p < 0.0005$ ) (Table 1). Incidence rate per 100,000 person year showed statistically  
45  
46 316 significant reduction in all age groups, ranging from 73.0% to 82.5%.

47 317

48 318 Majority of the patients with pneumococcal pneumonia were treated with in-patient  
49  
50 319 care. The total number of patients treated as outpatients and discharged from  
51  
52 320 emergency department was 30 in period 1 and 0 in period 3.

53 321

54  
55 322 The overall median LOS for pneumococcal pneumonia in period 1 and period 3 was  
56  
57 323 9 (IQR 14) days and 12 (IQR 17) days in all age group ( $p = 0.051$ ) (Table 2). Age  
58  
59 324 group stratification showed insignificant changes in length of stay in those aged 18-

1  
2  
3 325 49 years ( $p=0.8051$ ) and aged  $\geq 65$  years ( $p=0.226$ ). Increase in length of stay from 9  
4 326 (IQR 15) days to 13 (IQR 20) days was observed in age group 50-64 years, and was  
5 327 statistically significant ( $p=0.019$ ). Mortality rate for all ages was 13.1% (95% CI  
6 328 11.7%-14.8%) in period 1 and 22.7% (95%CI 15.5%-31.3%) in period 3 ( $p=0.0187$ ).  
7 329 Mortality rate was only statistically significant in aged 50-64 years ( $p=0.0007$ ) but not  
8 330 in aged 18-49 years ( $p=0.9917$ ) and aged  $\geq 65$  years ( $p=0.246$ ) (Table 2).  
9  
10  
11  
12  
13  
14

331

### 332 **All-cause pneumonia**

15 333 In the entire study period, total hospitalization episodes for all-cause pneumonia was  
16 334 453,999, of which 372,660 episodes in period 1 and 67,474 episodes in period 3.  
17 335 Among the 67,474 patients in period 3, 331 were diagnosed with COVID-19 and  
18 336 pneumonia. Monthly number of all-cause pneumonia peaked in January to March  
19 337 each year (Figure 1C and Figure S1). Mean monthly number of hospitalizations for  
20 338 all-cause pneumonia declined by 16.4% (95%CI 15.7%-17.1%,  $p<0.0005$ ) from  
21 339 6211 $\pm$ 845.0 episodes in period 1 to 5190.3 $\pm$ 593.8 episodes in period 3 ( $p<0.0005$ )  
22 340 (Figure 1C). Estimated change in trend in the mean number of cases in period 3 was  
23 341 -11% (95%CI -13% to -10%,  $p<0.0005$ ). By log-linear model segmented regression,  
24 342 relative risk of all-cause pneumonia in period 3 compared with period 1 was 0.98  
25 343 (95%CI 0.98-0.99,  $p<0.0005$ ) (Table S1).  
26  
27  
28  
29  
30  
31  
32  
33  
34  
35  
36  
37

344

38 345 Overall, the incidence rate per 100,000 person-years was 1,169.7 in period 1, with  
39 346 17.5% (95%CI 16.8%-18.2%,  $p<0.0005$ ) reduction in period 3 to 964.5 per 100,000  
40 347 person-years in period 3. Incidence rate ratio between period 1 and period 3 was  
41 348 0.83 (95%CI 0.82-0.83,  $p<0.0005$ ) (Table 1). The incidence rate decrease in period  
42 349 3 compared to period 1 in all age groups.  
43  
44  
45  
46  
47

350

48 351 The overall median LOS for all-cause pneumonia episodes was 6 (IQR 9) days in  
49 352 period 1 and 6 (IQR 10) days in period 3 ( $p<0.005$ ) (Table 2). Different age groups  
50 353 showed decrease in LOS but were only statistically significant in age 18-49 years  
51 354 and 50-64 years. The mortality rate increased from 20.5% (95% CI 20.4%-20.6%) in  
52 355 period 1 to 24.2% (95%CI 24.9%-25.6%) in period 3 ( $p<0.005$ ) for all-cause  
53 356 pneumonia. The increase in mortality rate was statistically significant in all age  
54 357 groups (Table 2).  
55  
56  
57  
58  
59  
60

1  
2  
3 358  
4  
5 359 For subgroup of aspiration pneumonia, total number of hospitalization in the entire  
6  
7 360 study period was 21,183, with 17990 episodes in period 1 and 2684 episodes in  
8  
9 361 period 3. Mean monthly number of aspiration pneumonia was  $299.8 \pm 31.3$  in period 1  
10  
11 362 and  $206.5 \pm 30.5$  in period 3 ( $p < 0.0005$ ).

12 363

13 364

### 15 365 **COVID-19**

17 366 In period 3, the total reported cases of COVID-19 infection at age 18 or above was  
18  
19 367 10,348 [15]. Among these patients, 331 were diagnosed with pneumonia. Majority of  
20  
21 368 them were in the age group 65 years old or above ( $n=175$ ). 58 of them were in age  
22  
23 369 group 18-49 while 98 patients in age group 50-64. None of the patients were  
24  
25 370 diagnosed with coinfection of COVID-19 and pneumococcal pneumonia.

26 371

27 372

### 29 373 **Influenza**

31 374 The total number of influenza A or B viruses detected from January 2015 to March  
32  
33 375 2021 in Hong Kong was 123,732. The monthly number of influenza detections  
34  
35 376 decreased drastically by 99.5% (95%CI 99.4%-99.5%,  $p < 0.0005$ ) from  $1,966 \pm 2179$   
36  
37 377 in period 1 to  $10 \pm 18$  in period 3 (Figure 1D and Figure S1). The monthly average  
38  
39 378 number of respiratory specimens tested was  $4313 \pm 1172$  in period 1 and  $3203 \pm 1868$   
40  
41 379 in period 3.

42 380 By log-linear model segmented regression, relative risk of influenza was 0.92  
43  
44 381 (95%CI 0.88-0.95,  $p < 0.0005$ ). Estimated change in trend in the mean number of  
45  
46 382 detections in period 3 was -99.0% (95%CI -99.3% to -98.7%,  $p < 0.0005$ ) of that in  
47  
48 383 period 1 (Figure 1D)

49 384

50 385

### 53 386 **Other diagnosis: acute kidney injury, PD peritonitis and fracture hip**

55 387 The monthly average number of hospitalization episodes for acute kidney injury in  
56  
57 388 period 1 and period 3 was  $807.8 \pm 87.5$  and  $911.7 \pm 62.6$ , respectively ( $p < 0.0005$ )

58  
59 389 (Figure 2) The monthly average number of hospitalization episodes for PD peritonitis

60

1  
2  
3 390 was 246.7±27.7 in period 1 and 255.9±31.9 in period 3 (p=0.23). The monthly  
4  
5 391 average number of hospitalization episodes for fracture hip was 432.9±53.1 in period  
6  
7 392 1 and 417.3±51.6 in period 3 (p=0.37)  
8  
9  
10  
11  
12  
13  
14  
15  
16  
17  
18  
19  
20  
21  
22  
23  
24  
25  
26  
27  
28  
29  
30  
31  
32  
33  
34  
35  
36  
37  
38  
39  
40  
41  
42  
43  
44  
45  
46  
47  
48  
49  
50  
51  
52  
53  
54  
55  
56  
57  
58  
59  
60

For peer review only

## 394 Discussion

395

396 Hong Kong is a city with population of 7.5 million where universal masking and social  
397 distancing were widely practiced during COVID-19 pandemic period. This study  
398 showed a drastic decrease in numbers of hospitalization for IPD and pneumococcal  
399 pneumonia and a lesser but still very significant decrease in all cause pneumonia  
400 after anti-COVID-19 measures in March 2020 to March 2021.

401

402 During COVID-19 period, decrease in incidence of IPD were observed in Taiwan and  
403 Singapore [31,32]. The decrease in IPD in Hong Kong was greater magnitude  
404 compare to other countries [33]. Our study added new information on the incidence  
405 and severity of IPD, pneumococcal pneumonia and all-cause pneumonia in terms of  
406 age-stratification.

407

408 In our COVID-19 patients, there was no pneumococcal co-infection. This may partly  
409 be contributed by the infrequent investigation of pneumonia with pneumococcal  
410 urinary tests and PCR assays. In an Italian study of 469 COVID-19 patients, 9% was  
411 found to be positive for urinary pneumococcal antigen. However, the positive result  
412 had no impact on clinical outcome [34]. In another study that investigated the  
413 respiratory specimens of COVID-19 patients using PCR assays, 60% were found to  
414 be positive for *Streptococcus pneumoniae* but it was unable to distinguish between  
415 colonization and infection [35]

416

417 Introduction of the current pneumococcal conjugate vaccines has been highly  
418 successful in reducing the incidence of pneumococcal diseases worldwide [36,37].  
419 Vaccine efficacy of PCV13 against vaccine type IPD in children aged  $\leq 5$  years was  
420 86%-96% [38]. In adults aged  $\geq 65$  years, the vaccine efficacy against vaccine type  
421 IPD was reported as 75% and against vaccine type community-acquired pneumonia  
422 were reported as 45.6% and 72.8% respectively [13,39]. In contrast, PPV23 only has  
423 vaccine efficacy of 24% against vaccine type community acquired pneumonia in  
424 aged  $\geq 65$  years [40]. In Hong Kong, a marked reduction in vaccine type IPD was  
425 observed in children few years after implementation of PCV in 2009 [10,12].  
426 However, the indirect effect on adult IPD was not evident. Annual number of adult  
427 IPD hospitalization remains static in period 1 (Figure 1A). Universal masking and



1  
2  
3 428 social distancing measures in Hong Kong was shown to have an association with  
4  
5 429 decrease in the incidence of SARS-CoV2 [41,42] and influenza [43] during the  
6  
7 430 COVID-19 pandemic. Our study showed 88.9% reduction in incidence of adult IPD.  
8  
9 431 The drastic decrease in incidence of IPD included both vaccine and non-vaccine  
10  
11 432 types and was comparable and greater than the reported figure after introduction of  
12  
13 433 pneumococcal vaccines [13,37]. IPD can lead to significant mortality and morbidity  
14  
15 434 [44]. Our study showed decrease in incidence and trend of IPD and were statistically  
16  
17 435 significant. The decrease in mortality of IPD during the COVID-19 pandemics was  
18  
19 436 statistically insignificant, which can be contributed by the relative small sample size.  
20

21 437  
22 438 Incidence of all-cause pneumonia showed a much lower magnitude of decrease with  
23  
24 439 the lesser decrease observed in those aged  $\geq 65$  years (supplementary file, Figure  
25  
26 440 S2C). In our study, patients with diagnosis of pneumonia during the hospital stay  
27  
28 441 were included. On review of data, majority of pneumonia patients in age group 65  
29  
30 442 years or above had other comorbidities including dementia, diabetes mellitus and  
31  
32 443 malignancy included in the same admission. The prevalence of chronic disease is  
33  
34 444 higher in elderly. The population of Hong Kong has been seeing an aging trend and  
35  
36 445 the population of 65 years old or above was 1,114,600 in 2015, and increased to  
37  
38 446 1,371,800 in 2020. The incidence of chronic disease, for example, malignancy  
39  
40 447 increased by 38.1% from 2008 to 2018 [17]. Patients with chronic diseases are at  
41  
42 448 higher risk of acquiring infection including pneumonia. Moreover, chronic disease  
43  
44 449 can be the cause leading to hospital admission with subsequent development of  
45  
46 450 hospital acquired pneumonia.  
47

48 451  
49 452 Pneumococcal pneumonia and IPD are debilitating diseases which have been  
50  
51 453 shown to require long length of hospital stay and high hospital cost [45,46]. The LOS  
52  
53 454 in pneumococcal pneumonia was slightly increased from 17.7 to 19.5 days but was  
54  
55 455 statistically insignificant. Looking into different age groups, only patients with age 50  
56  
57 456 to 64 years old showed statistically significant increase in LOS, while patients in age  
58  
59 457 group 18 to 49 years old and 65 years old or above showed slight decrease. The  
60  
61 458 severity of pneumococcal pneumonia were comparable in the two periods.  
62

63 459  
64 460 Health seeking behaviour was also evaluated in our study. Admissions of non-  
65  
66 461 communicable diseases revealed either statistically insignificant decrease in hospital

1  
2  
3 462 attendance or statistically significant increase in hospital attendance. The incidence  
4  
5 463 of AKI increased in our study from  $807.8 \pm 87.5$  in period 1 to  $911.7 \pm 62.6$  in period 3.  
6  
7 464 Drug induced AKI is an important cause in Asia [47]. Possible explanation can be  
8  
9 465 due to the health seeking behaviour of patients with intake of over-the counter  
10  
11 466 medication for mild diseases prior seeking help from the hospital. Yet the exact  
12  
13 467 cause of increase in incidence of AKI should be investigated. Our study covered  
14  
15 468 more than one year time for COVID-19 pandemics with a relatively stable number of  
16  
17 469 hospital attendance. Hence, the decrease in incidence of pneumococcal pneumonia,  
18  
19 470 IPD and all-cause pneumonia cannot be explained by health seeking behaviour  
20  
21 471 alone.

22  
23 472  
24 473 Collateral damages were observed during the COVID-19 pandemic [48-49], some of  
25  
26 474 which were contributed by the decrease in general medical services to concentrate  
27  
28 475 healthcare resources for the care of SARS-CoV-2 patients and the prevention of  
29  
30 476 possible viral spread. However, due to the relatively small number of COVID-19  
31  
32 477 cases in Hong Kong, provision of acute medical services was minimally disrupted. In  
33  
34 478 our study, the data on admissions for fractures, acute kidney injury and PD peritonitis  
35  
36 479 showed no decrease during the COVID-19 pandemic. Hence the observed  
37  
38 480 decrease in hospital admissions for pneumococcal pneumonia, IPD and all-cause  
39  
40 481 pneumonia should not be artefactual.

#### 41 482 42 483 43 484 **Limitations**

44 485 This is a retrospective observational study and the direct effect of universal masking,  
45  
46 486 social distancing (e.g. closure of schools, bars and pubs) and other strategies on  
47  
48 487 pneumococcal pneumonia, IPD and all-cause pneumonia cannot be ascertained.  
49  
50 488 However, our study covered a period of more than one year when infection control  
51  
52 489 related behavioral changes were made throughout, with a consistent observation of  
53  
54 490 decrease in hospitalization for these diseases seen. Other factors, namely ambient  
55  
56 491 temperature and AQHI, that might have possible effect on the hospitalization  
57  
58 492 numbers were also included in our analysis. However, the individual effects of  
59  
60 493 universal masking, social distancing and other strategies cannot be evaluated  
494  
separately. It is modelled by the effect of pandemic as a whole in our study.

1  
2  
3 495

4 496 Our study focused on hospital hospitalization numbers in the Hospital Authority. For  
5 497 IPD, the incidence was obtained from Central of Health Protection, HKSAR, which  
6 498 included data from both public and private hospitals data. The LOS and mortality  
7 499 data of IPD were retrieved from the database in Hospital Authority. Admissions to  
8 500 private hospital or those received out-patient treatment for pneumococcal pneumonia  
9 501 and all-cause pneumonia were not included in our study. However, Hospital  
10 502 Authority is the largest healthcare provider in Hong Kong which provides 90% of in-  
11 503 patient services in Hong Kong [26]. Data from Hospital Authority is representable for  
12 504 the general epidemiology of Hong Kong.  
13  
14  
15  
16  
17  
18  
19  
20  
21

22

### 23 506 **Conclusions**

24 507 The incidence of pneumococcal pneumonia, IPD and all-cause pneumonia  
25 508 decreased during COVID-19 pandemics compare to the data in previous five years.  
26 509 This was observed with widespread practice of universal masking and social  
27 510 distancing. While causality cannot be shown from our data, it is likely that the  
28 511 decrease could be attributed to universal masking and social distancing, which would  
29 512 have reduced the transmission of bacteria and viruses and related bacterial  
30 513 superinfection.  
31  
32  
33  
34  
35  
36  
37  
38  
39  
40  
41  
42  
43  
44  
45  
46  
47  
48  
49  
50  
51  
52  
53  
54  
55  
56  
57  
58  
59  
60

1  
2  
3 515 **Figure caption**  
4

5  
6 516 **Figure 1.** Trend analysis of monthly numbers of invasive pneumococcal disease  
7 517 (IPD), pneumococcal pneumonia, all-cause pneumonia, and influenza in Hong Kong,  
8 518 January 2015 to March 2021. Numbers of IPD were those obtained through  
9 519 mandatory notification. Numbers of pneumococcal pneumonia and all-cause  
10 520 pneumonia were territory-wide hospitalizations by discharge diagnoses. Numbers of  
11 521 influenza viruses were those detected in respiratory specimens in a territory-wide  
12 522 laboratory surveillance. The two vertical lines delineated the time intervals from  
13 523 January 2015 to December 2019 (period 1, prior to COVID-19), January to February  
14 524 2020 (period 2, excluded from analysis) and March 2020 to March 2021 (period 3,  
15 525 COVID-19 pandemic).  
16  
17  
18  
19  
20  
21  
22

23 526

24 527 **Figure 2.** Admission numbers of fracture hip, acute kidney injury and PD peritonitis.  
25  
26  
27  
28  
29  
30  
31  
32  
33  
34  
35  
36  
37  
38  
39  
40  
41  
42  
43  
44  
45  
46  
47  
48  
49  
50  
51  
52  
53  
54  
55  
56  
57  
58  
59  
60

529 **References**

- 530 1. Wu Z, McGoogan JM. Characteristics of and Important Lessons from the  
531 Coronavirus Disease 2019 (COVID-19) Outbreak in China: Summary of a Report  
532 of 72314 Cases From the Chinese Center for Disease Control and Prevention.  
533 *JAMA*. 2020.
- 534 2. World Health Organization statement on the second meeting of the International  
535 Health Regulations (2005) Emergency Committee regarding the outbreak of  
536 novel coronavirus (2019-nCoV. Available: [https://www.who.int/news/item/30-01-  
537 2020-statement-on-the-second-meeting-of-the-international-health-regulations-  
538 \(2005\)-emergency-committee-regarding-the-outbreak-of-novel-coronavirus-  
539 \(2019-ncov\)](https://www.who.int/news/item/30-01-2020-statement-on-the-second-meeting-of-the-international-health-regulations-(2005)-emergency-committee-regarding-the-outbreak-of-novel-coronavirus-(2019-ncov)). Accessed on 10th May 2021.
- 540 3. Ganaie F, Saad JS, McGee L, et al. A New Pneumococcal Capsule Type, 10D, is  
541 the 100th Serotype and Has a Large *cps* Fragment from an Oral Streptococcus.  
542 *mBio*. 2020 May 19;11(3):e00937-20.
- 543 4. Ludwig E, Bonanni P, Rohde G, et al. The remaining challenges of  
544 pneumococcal disease in adults. *Eur Respir Rev*. 2012 Mar 1;21(123):57-65.
- 545 5. Drijkoningen JJ, Rohde GG. Pneumococcal infection in adults: burden of disease.  
546 *Clin Microbiol Infect*. 2014 May;20 Suppl 5:45-51.
- 547 6. World Health Organization Pneumococcal Disease. Available:  
548 <https://www.who.int/ith/diseases/pneumococcal/en/>; Accessed on 7th June 2021.
- 549 7. Burgos J, Luján M, Larrosa MN, et al. The problem of early mortality in  
550 pneumococcal pneumonia: a study of risk factors. *Eur Respir J*. 2015  
551 Aug;46(2):561-4.
- 552 8. Chi RC, Jackson LA, Neuzil KM. Characteristics and outcomes of older adults  
553 with community-acquired pneumococcal bacteremia. *J Am Geriatr Soc*. 2006  
554 Jan;54(1):115-20.
- 555 9. Ho PL, Chiu SS, Chow FK, et al. Pediatric hospitalization for pneumococcal  
556 diseases preventable by 7-valent pneumococcal conjugate vaccine in Hong Kong.  
557 *Vaccine*. 2007 Sep 28;25(39-40):6837-41.
- 558 10. Ho PL, Chiu SS, Ang I, et al. Serotypes and antimicrobial susceptibilities of  
559 invasive Streptococcus pneumoniae before and after introduction of 7-valent  
560 pneumococcal conjugate vaccine, Hong Kong, 1995-2009. *Vaccine*. 2011 Apr  
561 12;29(17):3270-5.

- 1  
2  
3 562 11. Deloria, K.M., Bennett, J.C., Garcia, Q.M., et al. Global Landscape Review of  
4 563 Serotype-Specific Invasive Pneumococcal Disease Surveillance among  
5 564 Countries Using PCV10/13: The Pneumococcal Serotype Replacement and  
6 565 Distribution Estimation (PSERENADE) Project. *Microorganisms*. 9.  
7  
8  
9 566 12. Ho, P.L., Law, P.Y., and Chiu, S.S., 2019. Increase in incidence of invasive  
10 567 pneumococcal disease caused by serotype 3 in children eight years after the  
11 568 introduction of the pneumococcal conjugate vaccine in Hong Kong. *Hum. Vaccin.*  
12 569 *Immunother.* 15: 455-458.  
13  
14 570 13. Bonten MJ, Huijts SM, Bolkenbaas M, et al. Polysaccharide conjugate vaccine  
15 571 against pneumococcal pneumonia in adults. *N Engl J Med*. 2015 Mar  
16 572 19;372(12):1114-25.  
17  
18 573 14. López EL, Glatstein E, Ezcurra GC, et al. Rapid Decrease in Rates of  
19 574 Hospitalization Resulting From Invasive Pneumococcal Disease and Community-  
20 575 Acquired Pneumonia in Children Aged <60 Months After 13-Valent  
21 576 Pneumococcal Conjugate Vaccine Introduction in Argentina. *J Pediatric Infect Dis*  
22 577 *Soc*. 2018 Feb 19;7(1):30-35.  
23  
24 578 15. Nieto Guevara J, Daza C, Smith R. Decrease in Hospitalizations for Pneumonia  
25 579 in Children under Five Years of Age in an Indian Reservation in Panama after the  
26 580 Introduction of the Heptavalent Pneumococcal Conjugate Vaccine (PCV7). *Int J*  
27 581 *Pediatr*. 2013;2013:514578.  
28  
29 582 16. Maruyama T, Taguchi O, Niederman MS, et al. Efficacy of 23-valent  
30 583 pneumococcal vaccine in preventing pneumonia and improving survival in  
31 584 nursing home residents: double blind, randomised and placebo controlled trial.  
32 585 *BMJ*. 2010 Mar 8;340:c1004.  
33  
34 586 17. Centre for Health Protection, Department of Health, Hong Kong Special  
35 587 Administrative Region. Available: <https://www.chp.gov.hk/> Accessed on 5th May  
36 588 2021.  
37  
38 589 18. Department of Health Public Health Information System (PHIS). Available:  
39 590 [https://www.healthyhk.gov.hk/phishweb/en/chart\\_detail/26/](https://www.healthyhk.gov.hk/phishweb/en/chart_detail/26/) Accessed on 5th May  
40 591 2021.  
41  
42 592 19. Cucchiari D, Pericàs JM, Riera J, et al.; Hospital Clínic 4H Team. Pneumococcal  
43 593 superinfection in COVID-19 patients: A series of 5 cases. *Med Clin (Barc)*. 2020  
44 594 Dec 11;155(11):502-505.  
45  
46  
47  
48  
49  
50  
51  
52  
53  
54  
55  
56  
57  
58  
59  
60

- 1  
2  
3 595 20. Karami Z, Knoop BT, Dofferhoff ASM, et al. Few bacterial co-infections but  
4 596 frequent empiric antibiotic use in the early phase of hospitalized patients with  
5 597 COVID-19: results from a multicentre retrospective cohort study in The  
6 598 Netherlands. *Infect Dis (Lond)*. 2021 Feb;53(2):102-110.  
7  
8  
9 599 21. Hughes S, Troise O, Donaldson H, et al. Bacterial and fungal coinfection among  
10 600 hospitalized patients with COVID-19: a retrospective cohort study in a UK  
11 601 secondary-care setting. *Clin Microbiol Infect*. 2020 Oct;26(10):1395-1399.  
12  
13 602 22. Community Health Module Research Reports, Hong Kong Public Opinion  
14 603 Research Institute. Available: <https://www.pori.hk/research-reports>. Accessed on  
15 604 10th April 2021.  
16  
17 605 23. Chan KH, Lee PW, Chan CY, et al. Monitoring respiratory infections in covid-19  
18 606 epidemics. *BMJ*. 2020;369:m1628.  
19  
20 607 24. Chan KPF, Ma TF, Kwok WC, et al. Significant reduction in hospital admissions  
21 608 for acute exacerbation of chronic obstructive pulmonary disease in Hong Kong  
22 609 during coronavirus disease 2019 pandemic. *Respir Med*. 2020 Sep;171:106085.  
23  
24 610 25. Chan KPF, Kwok WC, Ma TF, et al. Territory-wide Study on Hospital Admissions  
25 611 for Asthma exacerbation in COVID-19 Pandemic. *Ann Am Thorac Soc*. 2021 Feb  
26 612 26.  
27  
28 613 26. Hospital Authority Statistical Report. Available:  
29 614 <https://www3.ha.org.hk/Data/HASStatistics/StatisticalReport>. Accessed on 12th  
30 615 April 2021.  
31  
32 616 27. Hong Kong Observatory.  
33 617 Available: <https://www.hko.gov.hk/en/wxinfo/pastwx/mws/mws.htm>. Accessed on  
34 618 18th April 2021.  
35  
36 619 28. Air Quality Health Index monthly summary.  
37 620 Available: [https://www.aqhi.gov.hk/en/aqhi/statistics-of-aqhi/aqhi-monthly-](https://www.aqhi.gov.hk/en/aqhi/statistics-of-aqhi/aqhi-monthly-summary.html)  
38 621 [summary.html](https://www.aqhi.gov.hk/en/aqhi/statistics-of-aqhi/aqhi-monthly-summary.html). Accessed on 18th April 2021.  
39  
40 622 29. Wagner AK, Soumerai SB, Zhang F, et al. Segmented regression analysis of  
41 623 interrupted time series studies in medication use research. *J Clin Pharm Ther*.  
42 624 2002 Aug;27(4):299-309.  
43  
44 625 30. A. Agresti. *Categorical Data Analysis, 3rd Edition*. Wiley, 2012.  
45  
46 626 31. Lim RH, Chow A, Ho HJ. Decline in pneumococcal disease incidence in the time  
47 627 of COVID-19 in Singapore. *J Infect*. 2020;81(6):e19-e21.  
48  
49  
50  
51  
52  
53  
54  
55  
56  
57  
58  
59  
60



- 1  
2  
3 628 32. Juan HC, Chao CM, Lai CC, et al. Decline in invasive pneumococcal disease  
4 629 during COVID-19 pandemic in Taiwan. *J Infect.* 2021 Feb;82(2):282-327.
- 5  
6 630 33. Teng JLL, Fok KMN, Lin KPK, et al. Substantial decline in invasive  
7 631 pneumococcal disease (IPD) during COVID-19 pandemic in Hong Kong. *Clin*  
8 632 *Infect Dis.* 2021 Apr 27:ciab382.
- 9  
10 633 34. Valsecchi P, Colaneri M, Zuccaro V, et al. Impact of Pneumococcal Urinary  
11 634 Antigen Testing in COVID-19 Patients: Outcomes from the San Matteo COVID-  
12 635 19 Registry (SMACORE). *J Pers Med.* 2021 Jul 31;11(8):762.
- 13  
14 636 35. Zhu X, Ge Y, Wu T, Zhao K, Chen Y, Wu B, Zhu F, Zhu B, Cui L. Co-infection  
15 637 with respiratory pathogens among COVID-2019 cases. *Virus Res.* 2020  
16 638 Aug;285:198005.
- 17  
18 639 36. Bennett JC, Hetrich MK, Garcia Quesada M, et al. Changes in Invasive  
19 640 Pneumococcal Disease Caused by *Streptococcus pneumoniae* Serotype 1  
20 641 Following Introduction of PCV10 and PCV13: Findings from the PSERENADE  
21 642 Project. *Microorganisms.* 2021 Mar 27;9(4):696.
- 22  
23 643 37. Waight PA, Andrews NJ, Ladhani SN, et al. Effect of the 13-valent pneumococcal  
24 644 conjugate vaccine on invasive pneumococcal disease in England and Wales 4  
25 645 years after its introduction: an observational cohort study. *Lancet Infect Dis.* 2015  
26 646 May;15(5):535-43.
- 27  
28 647 38. Berman-Rosa M, O'Donnell S, Barker M, et al. Efficacy and Effectiveness of the  
29 648 PCV-10 and PCV-13 Vaccines Against Invasive Pneumococcal Disease.  
30 649 *Pediatrics.* 2020 Apr;145(4):e20190377.
- 31  
32 650 39. McLaughlin JM, Jiang Q, Isturiz RE, et al. Effectiveness of 13-Valent  
33 651 Pneumococcal Conjugate Vaccine Against Hospitalization for Community-  
34 652 Acquired Pneumonia in Older US Adults: A Test-Negative Design. *Clin Infect Dis.*  
35 653 2018 Oct 30;67(10):1498-1506.
- 36  
37 654 40. Lawrence H, Pick H, Baskaran V, et al. Effectiveness of the 23-valent  
38 655 pneumococcal polysaccharide vaccine against vaccine serotype pneumococcal  
39 656 pneumonia in adults: A case-control test-negative design study. *PLoS Med.* 2020  
40 657 Oct 23;17(10):e1003326.
- 41  
42 658 41. Cheng VC, Wong SC, Chuang VW, et al. The role of community-wide wearing of  
43 659 face mask for control of coronavirus disease 2019 (COVID-19) epidemic due to  
44 660 SARS-CoV-2. *J Infect.* 2020 Jul;81(1):107-114.
- 45  
46  
47  
48  
49  
50  
51  
52  
53  
54  
55  
56  
57  
58  
59  
60

- 1  
2  
3 661 42. Chan JF, Yuan S, Zhang AJ, et al. Surgical Mask Partition Reduces the Risk of  
4 662 Noncontact Transmission in a Golden Syrian Hamster Model for Coronavirus  
5 663 Disease 2019 (COVID-19). *Clin Infect Dis*. 2020 Nov 19;71(16):2139-2149.  
6  
7 664 43. Wong SC, Lam GK, AuYeung CH, et al. Absence of nosocomial influenza and  
8 665 respiratory syncytial virus infection in the coronavirus disease 2019 (COVID-19)  
9 666 era: Implication of universal masking in hospitals. *Infect Control Hosp Epidemiol*.  
10 667 2021 Feb;42(2):218-221.  
11  
12 668 44. Chan T, Tay MZ, Kyaw WM, et al. Epidemiology, vaccine effectiveness, and risk  
13 669 factors for mortality for pneumococcal disease among hospitalised adults in  
14 670 Singapore: a case-control study. *BMC Infect Dis*. 2020 Jun 17;20(1):423.  
15  
16 671 45. Darbà J, Marsà A. Hospital incidence, in-hospital mortality and medical costs of  
17 672 pneumococcal disease in Spain (2008-2017): a retrospective multicentre study.  
18 673 *Curr Med Res Opin*. 2021 Mar;37(3):523-530.  
19  
20 674 46. Brotons P, Gelabert G, Launes C, et al. Cost of hospitalizing children with  
21 675 invasive pneumococcal pneumonia. *Vaccine*. 2013 Feb 4;31(7):1117-22.  
22  
23 676 47. Yang L. Acute Kidney Injury in Asia. *Kidney Dis (Basel)*. 2016;2(3):95-102.  
24  
25 677 48. Bersano A, Kraemer M, Touzé E, et al. Stroke care during the COVID-19  
26 678 pandemic: experience from three large European countries. *Eur J Neurol*. 2020  
27 679 Sep;27(9):1794-1800.  
28  
29 680 49. Del Vecchio Blanco G, Calabrese E, et al. The impact of COVID-19 pandemic in  
30 681 the colorectal cancer prevention. *Int J Colorectal Dis*. 2020 Oct;35(10):1951-1  
31  
32  
33  
34  
35  
36  
37  
38  
39  
40  
41  
42  
43  
44  
45  
46  
47  
48  
49  
50  
51  
52  
53  
54  
55  
56  
57  
58  
59  
60

**Table 1.** Incidence and number per 100,000 person year of pneumococcal pneumonia, invasive pneumococcal disease (IPD) and pneumonia

|                          | All ages        |                                         | 18-49 years     |                                         | 50-64 years     |                                         | ≥65 years    |                                         |
|--------------------------|-----------------|-----------------------------------------|-----------------|-----------------------------------------|-----------------|-----------------------------------------|--------------|-----------------------------------------|
| Disease <sup>a</sup>     | No. of episodes | Incidence rate per 100,000 person-years | No. of episodes | Incidence rate per 100,000 person-years | No. of episodes | Incidence rate per 100,000 person-years | No. of cases | Incidence rate per 100,000 person-years |
| IPD                      |                 |                                         |                 |                                         |                 |                                         |              |                                         |
| Period 1                 | 699             | 2.2                                     | 125             | 0.7                                     | 195             | 2.2                                     | 379          | 6.2                                     |
| Period 2                 | 26              | 2.4                                     | 5               | 0.9                                     | 6               | 2.0                                     | 15           | 6.6                                     |
| Period 3                 | 17              | 0.2                                     | 3               | 0.08                                    | 8               | 0.4                                     | 6            | 0.4                                     |
| % reduction <sup>b</sup> |                 | 88.9% (79.8%-98.0%) <sup>***</sup>      |                 | 88.6% (66.8%-110.4%) <sup>***</sup>     |                 | 81.3% (62.1%-100.4%) <sup>***</sup>     |              | 93.5% (82.2%-104.8%) <sup>***</sup>     |
| IRR <sup>c</sup>         |                 | 0.11(0.07-0.18) <sup>***</sup>          |                 | 0.11(0.04-0.36) <sup>***</sup>          |                 | 0.19(0.09-0.38) <sup>***</sup>          |              | 0.07(0.03-0.15) <sup>***</sup>          |
| Pneumococcal pneumonia   |                 |                                         |                 |                                         |                 |                                         |              |                                         |
| Period 1                 | 1,970           | 6.2                                     | 217             | 1.3                                     | 435             | 4.9                                     | 1,318        | 21.7                                    |
| Period 2                 | 74              | 6.9                                     | 11              | 2.0                                     | 14              | 4.7                                     | 49           | 32.4                                    |
| Period 3                 | 119             | 1.7                                     | 8               | 0.2                                     | 24              | 1.2                                     | 87           | 5.9                                     |
| % reduction              |                 | 72.5% (65.9%-79.1%) <sup>***</sup>      |                 | 82.5% (64.5%-100.5%) <sup>***</sup>     |                 | 74.8% (61.0%-88.6%) <sup>***</sup>      |              | 73.0% (65.2%-80.8%) <sup>***</sup>      |
| IRR <sup>c</sup>         |                 | 0.28(0.23-0.33) <sup>***</sup>          |                 | 0.18(0.09-0.35) <sup>***</sup>          |                 | 0.25(0.17-0.38) <sup>***</sup>          |              | 0.27(0.22-0.34) <sup>***</sup>          |
| All-cause pneumonia      |                 |                                         |                 |                                         |                 |                                         |              |                                         |
| Period 1                 | 372,660         | 1169.7                                  | 19,502          | 115.3                                   | 38,360          | 432.4                                   | 314,798      | 5177.1                                  |
| Period 2                 | 13,865          | 1288.2                                  | 843             | 153.6                                   | 1,448           | 484.6                                   | 11,574       | 5062.3                                  |
| Period 3                 | 67,474          | 964.5                                   | 2,473           | 69.3                                    | 6,181           | 318.3                                   | 58,820       | 3958.0                                  |
| % reduction              |                 | 17.5% (16.8%-18.2%) <sup>***</sup>      |                 | 39.9% (37.1%-42.7%) <sup>***</sup>      |                 | 26.4% (24.3%-28.5%) <sup>***</sup>      |              | 23.5% (22.8%-24.3%) <sup>***</sup>      |
| IRR <sup>c</sup>         |                 | 0.83(0.82-0.83) <sup>***</sup>          |                 | 0.60(0.58-0.63) <sup>***</sup>          |                 | 0.74(0.72-0.76) <sup>***</sup>          |              | 0.77(0.76-0.77) <sup>***</sup>          |

<sup>a</sup> Period 1, January 2015 to December 2019 (before covid-19); period 2, January 2020 to February 2020 (transition period); period 3 March 2020 to March 2021 (post-COVID-19).

<sup>b</sup> Percentage reduction in period 3 relative to period 1 as the baseline

<sup>c</sup> Incidence rate ratio between period 1 and period 3

\*p <0.05 to 0.01, \*\*p <0.01 to 0.005, \*\*\*p <0.005

**Table 2.** Median length of stay and mortality rate of pneumococcal pneumonia, invasive pneumococcal disease (IPD) and pneumonia in the periods

|                               | Median length of stay; days (IQR)# |             |             |           | Mortality rate; % (95%CI) |                |                     |                     |
|-------------------------------|------------------------------------|-------------|-------------|-----------|---------------------------|----------------|---------------------|---------------------|
|                               | All ages                           | 18-49 years | 50-64 years | ≥65 years | All ages                  | 18-49 years    | 50-64 years         | ≥65 years           |
| <b>IPD</b>                    |                                    |             |             |           |                           |                |                     |                     |
| Period 1                      | 12 (16)                            | 13 (19)     | 13 (17)     | 12 (13)   | 12.1 (8.8-16.1)           | 9.1 (3.4-18.7) | 8.4 (3.7-15.9)      | 15.3 (10.3-21.4)    |
| Period 3                      | 12 (11)                            | 4 (3)       | 16 (19)     | 12 (6)    | 6.3 (1.6-30.2)            | 0.0            | 0.0                 | 14.3 (3.6-57.9)     |
| <b>Pneumococcal Pneumonia</b> |                                    |             |             |           |                           |                |                     |                     |
| Period 1                      | 9 (14)                             | 7 (14)      | 9 (15)*     | 10 (14)   | 13.1 (11.7-14.8)*         | 4.2 (1.9-7.7)  | 7.5 (5.3-10.5)**    | 16.3 (13.6-18.7)    |
| Period 3                      | 12 (17)                            | 7 (13)      | 13 (20)*    | 12 (16)   | 22.7 (15.5-31.3)*         | 0.0            | 29.2 (12.6-51.1)**  | 23.0 (14.6-33.2)    |
| <b>All-cause pneumonia</b>    |                                    |             |             |           |                           |                |                     |                     |
| Period 1                      | 6 (9)***                           | 4 (6)***    | 6 (9)**     | 6 (10)    | 20.5 (20.4-20.6)***       | 5.3 (4.9-5.6)* | 13.0 (11.4-12.0)*** | 22.4 (22.2-22.4)*** |
| Period 3                      | 6 (10)***                          | 4 (8)***    | 6 (10)**    | 6 (10)    | 24.2 (24.9-25.6)***       | 6.8 (5.9-7.9)* | 16.1 (5.2-17.0)***  | 27.0 (26.6-27.3)*** |

\*p &lt;0.05 to 0.01, \*\*p &lt;0.01 to 0.005, \*\*\*p&lt;0.005

# IQR= interquartile range



Figure 1. Trend analysis of monthly numbers of invasive pneumococcal disease (IPD), pneumococcal pneumonia, all-cause pneumonia, and influenza in Hong Kong, January 2015 to March 2021. Numbers of IPD were those obtained through mandatory notification. Numbers of pneumococcal pneumonia and all-cause pneumonia were territory-wide hospitalizations by discharge diagnoses. Numbers of influenza viruses were those detected in respiratory specimens in a territory-wide laboratory surveillance. The two vertical lines delineated the time intervals from January 2015 to December 2019 (period 1, prior to COVID-19), January to February 2020 (period 2, excluded from analysis) and March 2020 to March 2021 (period 3, COVID-19 pandemic).

352x218mm (144 x 144 DPI)



Figure 2. Admission numbers of fracture hip, acute kidney injury and PD peritonitis.

419x237mm (144 x 144 DPI)

Supplementary file.

Figure S1. Monthly incidence of (A) Invasive pneumococcal disease (IPD), (B) Pneumococcal pneumonia, (C) All-cause pneumonia and (D) Influenza in January 2015 to March 2021.

(A) Invasive pneumococcal disease

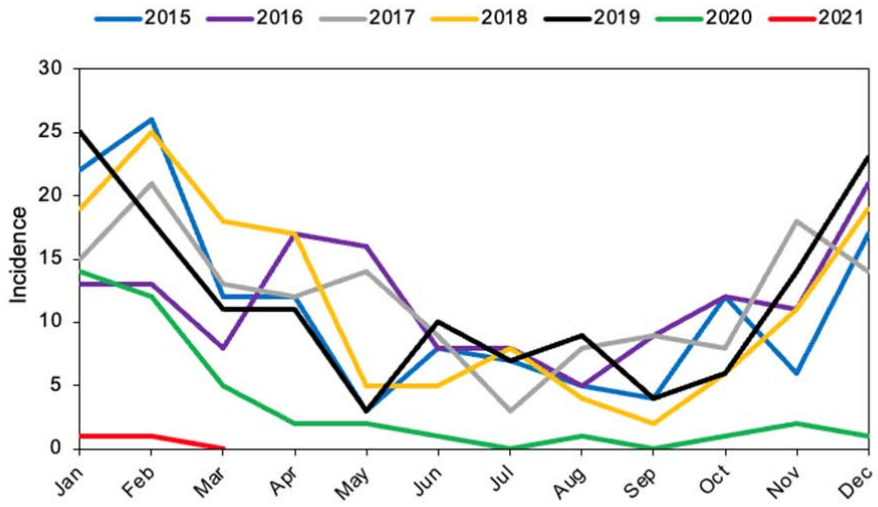

(B) Pneumococcal pneumonia

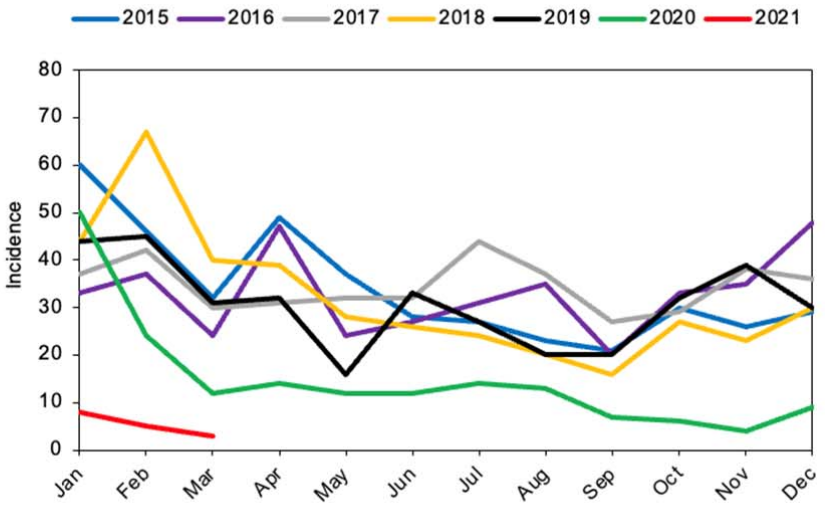

(C) All-cause pneumonia

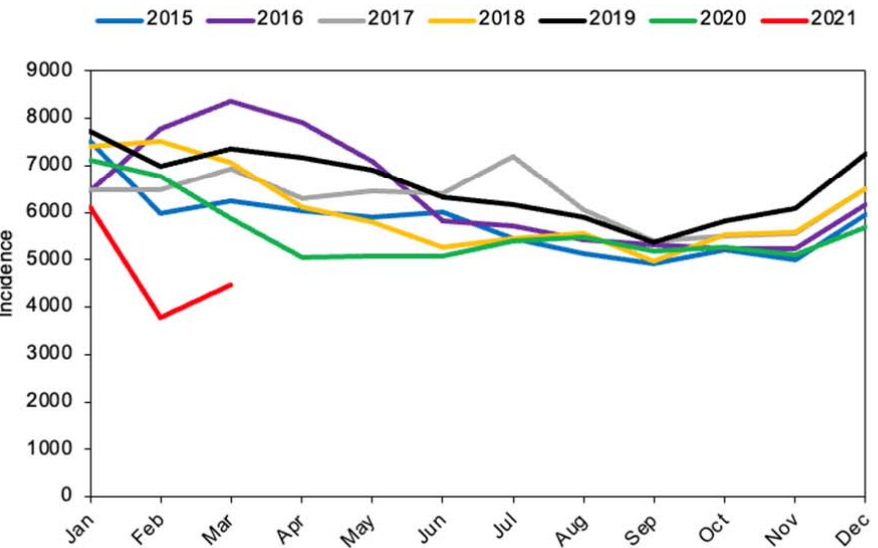

(D) Influenza

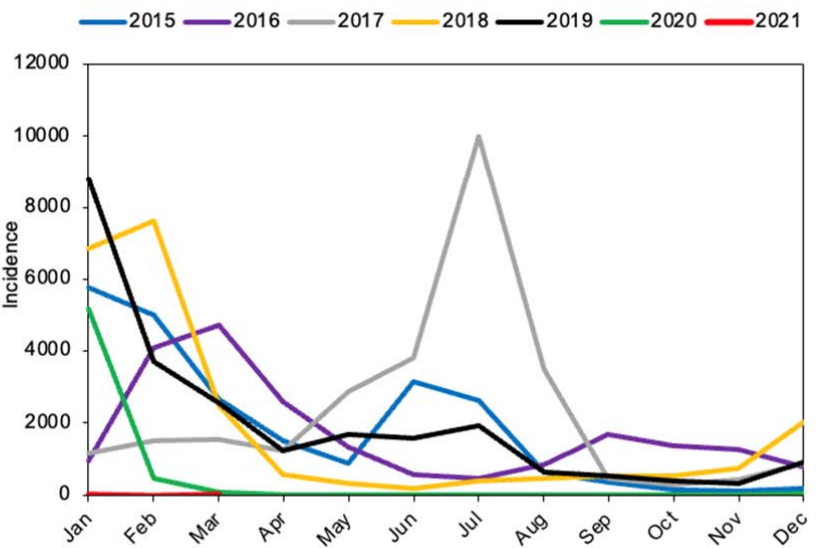



**Figure S2.** Trend analysis of monthly number of (A) age-stratified hospitalizations for invasive pneumococcal disease, (B) age-stratified hospitalizations for pneumococcal pneumonia, (C) age-stratified hospitalizations for and (D) monthly percentage of air quality health index (AQHI) high to serious and (E) monthly average ambient temperature.

(A) Invasive pneumococcal disease

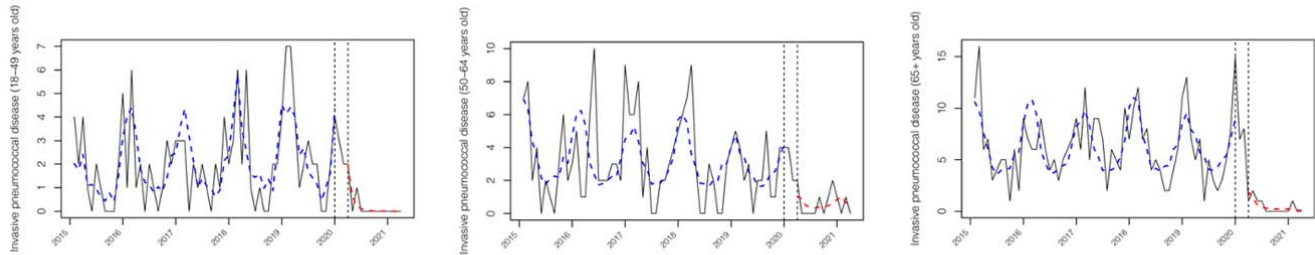

(B) Pneumococcal pneumonia

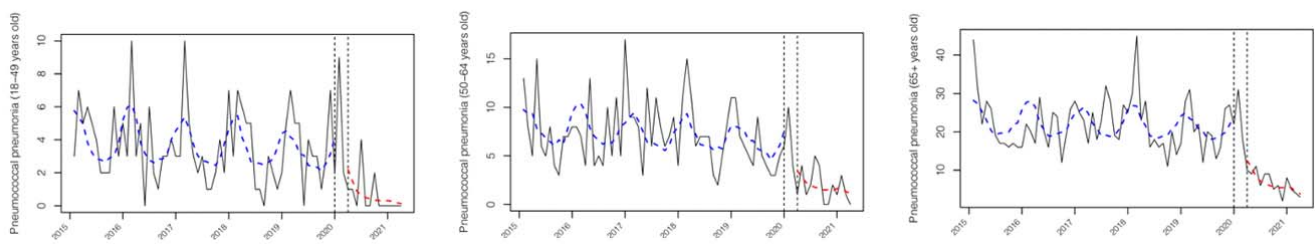

(C) All cause pneumonia

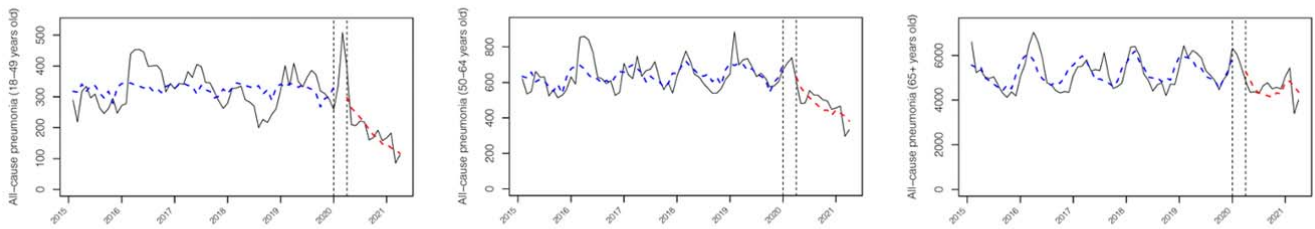

(D) Monthly % of AQHI high to serious

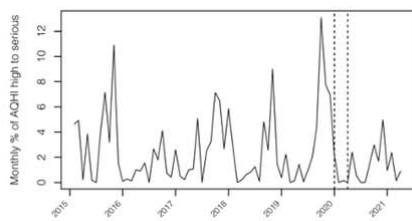

(E) Monthly average temperature

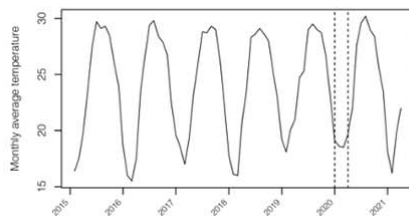

**Table S1.** Trend analysis of monthly number of hospitalization by age groups in periods before and after the COVID-19 pandemic

|                                   | Relative risk (95% CI)   |                          | Change in trend#               |
|-----------------------------------|--------------------------|--------------------------|--------------------------------|
|                                   | Period 1 ^               | Period 3^                |                                |
| <b>IPD</b>                        |                          |                          |                                |
| All ages                          | 1.0020 (0.9977-1.064)    | 0.8484 (0.7501-0.9597)** | -70.39% (-86.55% to -34.73%)** |
| 18-49 years                       | 1.0129 (1.0022-1.0238)   | 0.5272 (0.2176-1.2772)   | -31.27% (-89.72% to 359.72%)   |
| 50-64 years                       | 0.9969 (0.9888-1.0051)   | 0.9585 (0.8087-1.1362)   | -70.43% (-92.80% to 21.42%)    |
| 65 years or above                 | 1.0012 (0.9953-1.0071)   | 0.7777 (0.6111-0.9897)*  | -70.83% (-91.59% to 1.12%)     |
|                                   |                          |                          |                                |
| <b>Pneumococcal<br/>Pneumonia</b> |                          |                          |                                |
| All ages                          | 0.9978(0.9953-1.0004)    | 0.9042(0.8621-0.9483)*** | -42.79% (-59.36% to -19.48%)*  |
| 18-49 years                       | 0.9964(0.9887-1.0042)    | 0.6768(0.2171-2.1093)    | -32.32% (-78.29% to 110.93%)   |
| 50-64 years                       | 0.9962(0.9907-1.0017)    | 0.9174(0.8260-1.0189)    | -50.21% (-76.93% to 7.48%)     |
| 65 years or above                 | 0.9986(0.9954-1.0017)    | 0.9107(0.8612-0.9640)*   | -41.19% (-60.82% to -11.73%)*  |
|                                   |                          |                          |                                |
| <b>All-cause pneumonia</b>        |                          |                          |                                |
| All ages                          | 1.0014(1.0012-1.0016)*** | 0.9835(0.9815-0.9855)*** | -11.24% (-12.76% to -9.7%)***  |
| 18-49 years                       | 1.0000(0.9992-1.0008)    | 0.9263(0.9164-0.9364)*** | -6.05% (-13.41% to 1.94%)      |
| 50-64 years                       | 1.0015(1.0009-1.0021)*** | 0.9620(0.9556-0.9684)*** | -9.32% (-14.14% to -4.22%)***  |
| 65 years or above                 | 1.0011(1.0009-1.0013)*** | 0.9879(0.9858-0.9901)*** | -13.30% (-12.94% to -9.64%)*** |

^Trend in period 1 (January 2015 to December 2019) and 3 (March 2020 to March 2021), the relative risk expressed the month-to-month change in hospitalization numbers of period 3 compared to period 1

#Estimate the change in trend in the mean monthly number of cases in period 3, compare with the monthly trend in period 1

\*p <0.05 to 0.01, \*\*p <0.01 to 0.005, \*\*\*p<0.005

## STROBE Statement—checklist of items that should be included in reports of observational studies

|                              | Item No | Recommendation                                                                                                                                                                                                                                                                                                                                                                                                                                                         | Page No |
|------------------------------|---------|------------------------------------------------------------------------------------------------------------------------------------------------------------------------------------------------------------------------------------------------------------------------------------------------------------------------------------------------------------------------------------------------------------------------------------------------------------------------|---------|
| <b>Title and abstract</b>    | 1       | (a) Indicate the study's design with a commonly used term in the title or the abstract                                                                                                                                                                                                                                                                                                                                                                                 | 1-2     |
|                              |         | (b) Provide in the abstract an informative and balanced summary of what was done and what was found                                                                                                                                                                                                                                                                                                                                                                    | 2-3     |
| <b>Introduction</b>          |         |                                                                                                                                                                                                                                                                                                                                                                                                                                                                        |         |
| Background/rationale         | 2       | Explain the scientific background and rationale for the investigation being reported                                                                                                                                                                                                                                                                                                                                                                                   | 5-6     |
| Objectives                   | 3       | State specific objectives, including any prespecified hypotheses                                                                                                                                                                                                                                                                                                                                                                                                       | 6       |
| <b>Methods</b>               |         |                                                                                                                                                                                                                                                                                                                                                                                                                                                                        |         |
| Study design                 | 4       | Present key elements of study design early in the paper                                                                                                                                                                                                                                                                                                                                                                                                                | 7-8     |
| Setting                      | 5       | Describe the setting, locations, and relevant dates, including periods of recruitment, exposure, follow-up, and data collection                                                                                                                                                                                                                                                                                                                                        | 7-8     |
| Participants                 | 6       | (a) <i>Cohort study</i> —Give the eligibility criteria, and the sources and methods of selection of participants. Describe methods of follow-up<br><i>Case-control study</i> —Give the eligibility criteria, and the sources and methods of case ascertainment and control selection. Give the rationale for the choice of cases and controls<br><i>Cross-sectional study</i> —Give the eligibility criteria, and the sources and methods of selection of participants | 7-8     |
|                              |         | (b) <i>Cohort study</i> —For matched studies, give matching criteria and number of exposed and unexposed<br><i>Case-control study</i> —For matched studies, give matching criteria and the number of controls per case                                                                                                                                                                                                                                                 | 7-8     |
| Variables                    | 7       | Clearly define all outcomes, exposures, predictors, potential confounders, and effect modifiers. Give diagnostic criteria, if applicable                                                                                                                                                                                                                                                                                                                               | 7-8     |
| Data sources/<br>measurement | 8*      | For each variable of interest, give sources of data and details of methods of assessment (measurement). Describe comparability of assessment methods if there is more than one group                                                                                                                                                                                                                                                                                   | 7-8     |
| Bias                         | 9       | Describe any efforts to address potential sources of bias                                                                                                                                                                                                                                                                                                                                                                                                              | 8       |
| Study size                   | 10      | Explain how the study size was arrived at                                                                                                                                                                                                                                                                                                                                                                                                                              | 7-8     |
| Quantitative variables       | 11      | Explain how quantitative variables were handled in the analyses. If applicable, describe which groupings were chosen and why                                                                                                                                                                                                                                                                                                                                           | 7-9     |
| Statistical methods          | 12      | (a) Describe all statistical methods, including those used to control for confounding                                                                                                                                                                                                                                                                                                                                                                                  | 8-9     |
|                              |         | (b) Describe any methods used to examine subgroups and interactions                                                                                                                                                                                                                                                                                                                                                                                                    | 8-9     |
|                              |         | (c) Explain how missing data were addressed                                                                                                                                                                                                                                                                                                                                                                                                                            | N/A     |
|                              |         | (d) <i>Cohort study</i> —If applicable, explain how loss to follow-up was addressed<br><i>Case-control study</i> —If applicable, explain how matching of cases and controls was addressed<br><i>Cross-sectional study</i> —If applicable, describe analytical methods taking account of sampling strategy                                                                                                                                                              | N/A     |
|                              |         | (e) Describe any sensitivity analyses                                                                                                                                                                                                                                                                                                                                                                                                                                  | 8-9     |

Continued on next page

1  
2  
3  
4  
5  
6  
7  
8  
9  
10  
11  
12  
13  
14  
15  
16  
17  
18  
19  
20  
21  
22  
23  
24  
25  
26  
27  
28  
29  
30  
31  
32  
33  
34  
35  
36  
37  
38  
39  
40  
41  
42  
43  
44  
45  
46  
47  
48  
49  
50  
51  
52  
53  
54  
55  
56  
57  
58  
59  
60**Results**

|                  |     |                                                                                                                                                                                                              |       |
|------------------|-----|--------------------------------------------------------------------------------------------------------------------------------------------------------------------------------------------------------------|-------|
| Participants     | 13* | (a) Report numbers of individuals at each stage of study—eg numbers potentially eligible, examined for eligibility, confirmed eligible, included in the study, completing follow-up, and analysed            | 11-15 |
|                  |     | (b) Give reasons for non-participation at each stage                                                                                                                                                         | N/A   |
|                  |     | (c) Consider use of a flow diagram                                                                                                                                                                           | N/A   |
| Descriptive data | 14* | (a) Give characteristics of study participants (eg demographic, clinical, social) and information on exposures and potential confounders                                                                     | 11-15 |
|                  |     | (b) Indicate number of participants with missing data for each variable of interest                                                                                                                          | N/A   |
|                  |     | (c) <i>Cohort study</i> —Summarise follow-up time (eg, average and total amount)                                                                                                                             |       |
| Outcome data     | 15* | <i>Cohort study</i> —Report numbers of outcome events or summary measures over time                                                                                                                          | 11-15 |
|                  |     | <i>Case-control study</i> —Report numbers in each exposure category, or summary measures of exposure                                                                                                         |       |
|                  |     | <i>Cross-sectional study</i> —Report numbers of outcome events or summary measures                                                                                                                           |       |
| Main results     | 16  | (a) Give unadjusted estimates and, if applicable, confounder-adjusted estimates and their precision (eg, 95% confidence interval). Make clear which confounders were adjusted for and why they were included | 11-15 |
|                  |     | (b) Report category boundaries when continuous variables were categorized                                                                                                                                    |       |
|                  |     | (c) If relevant, consider translating estimates of relative risk into absolute risk for a meaningful time period                                                                                             |       |
| Other analyses   | 17  | Report other analyses done—eg analyses of subgroups and interactions, and sensitivity analyses                                                                                                               | 11-15 |

**Discussion**

|                  |    |                                                                                                                                                                            |       |
|------------------|----|----------------------------------------------------------------------------------------------------------------------------------------------------------------------------|-------|
| Key results      | 18 | Summarise key results with reference to study objectives                                                                                                                   | 16-17 |
| Limitations      | 19 | Discuss limitations of the study, taking into account sources of potential bias or imprecision. Discuss both direction and magnitude of any potential bias                 | 18-19 |
| Interpretation   | 20 | Give a cautious overall interpretation of results considering objectives, limitations, multiplicity of analyses, results from similar studies, and other relevant evidence | 16-19 |
| Generalisability | 21 | Discuss the generalisability (external validity) of the study results                                                                                                      | 16-18 |

**Other information**

|         |    |                                                                                                                                                               |   |
|---------|----|---------------------------------------------------------------------------------------------------------------------------------------------------------------|---|
| Funding | 22 | Give the source of funding and the role of the funders for the present study and, if applicable, for the original study on which the present article is based | 3 |
|---------|----|---------------------------------------------------------------------------------------------------------------------------------------------------------------|---|

\*Give information separately for cases and controls in case-control studies and, if applicable, for exposed and unexposed groups in cohort and cross-sectional studies.

**Note:** An Explanation and Elaboration article discusses each checklist item and gives methodological background and published examples of transparent reporting. The STROBE checklist is best used in conjunction with this article (freely available on the Web sites of PLoS Medicine at <http://www.plosmedicine.org/>, Annals of Internal Medicine at <http://www.annals.org/>, and Epidemiology at <http://www.epidem.com/>). Information on the STROBE Initiative is available at [www.strobe-statement.org](http://www.strobe-statement.org).
